# Supplementary material for: Synthesis, Biological Evaluation and Docking Studies of Ring-Opened Analogues of Ipomoeassin F
Source: MDPI journal article supplement (doi:10.3390/molecules27144419), 2022-07-10

## **Supplementary Material S1:**

### **Synthesis, Biological Evaluation and Docking Studies of Ring-Opened Analogues of Ipomoeassin F**

Sarah O'Keefe, Pratiti Bhadra, Kwabena B. Duah, Guanghui Zong, Levis Tenay, Lauren Andrews, Hayden Schneider, Ashley Anderson, Zhijian Hu, Hazim S. Aljewari, Belinda S. Hall, *Rachel E. Simmonds*, Volkhard Helms, Stephen High and Wei Q. Shi

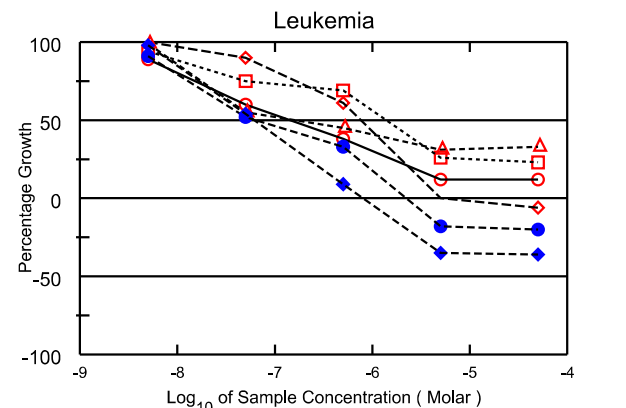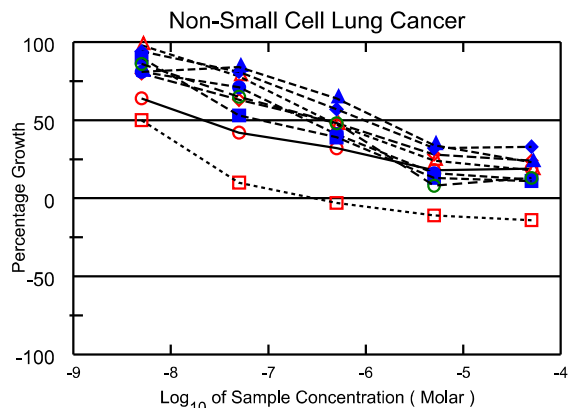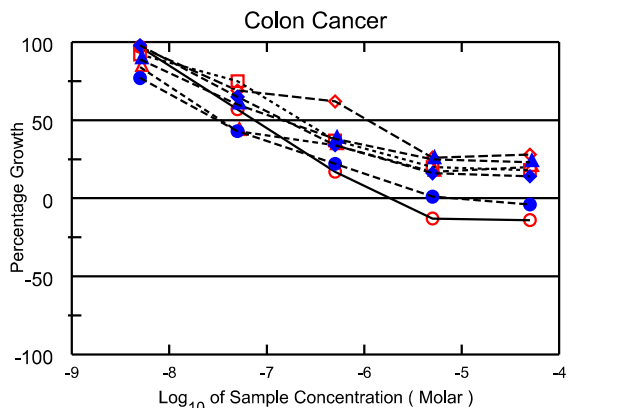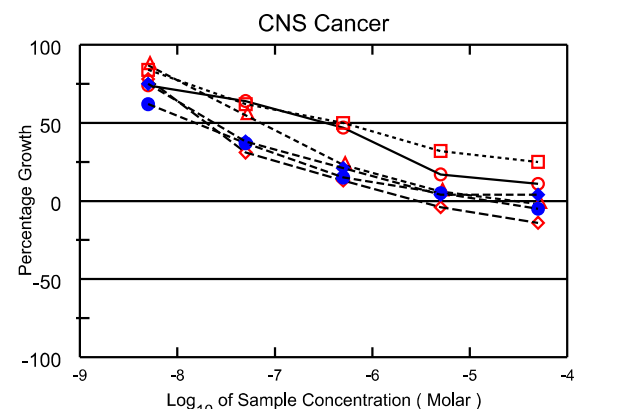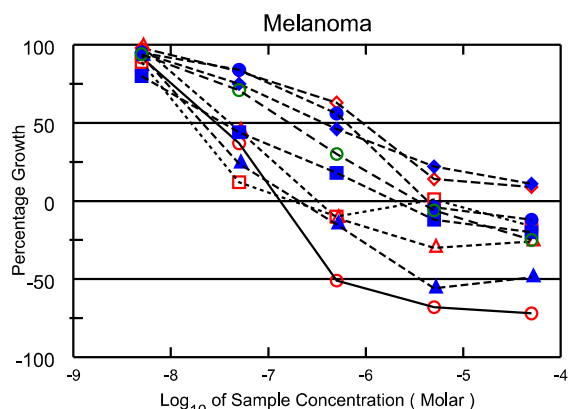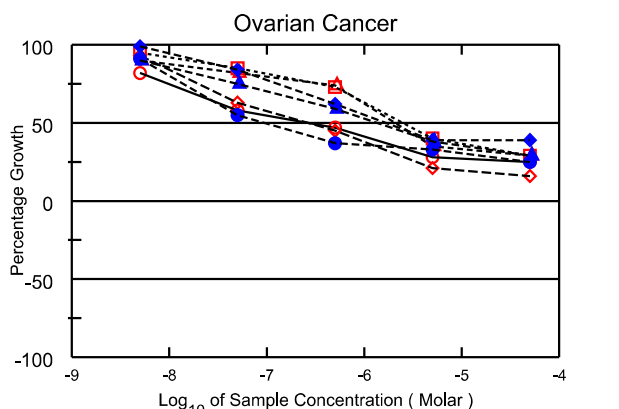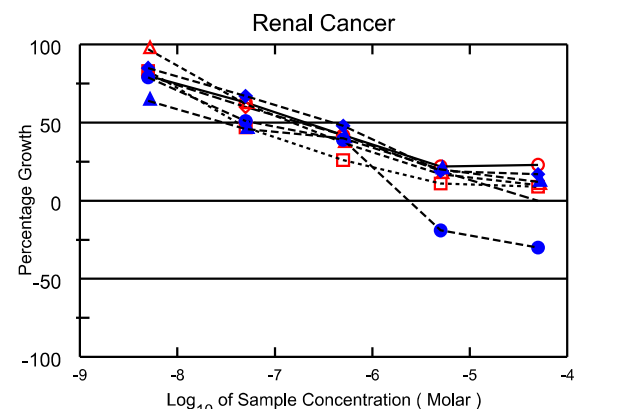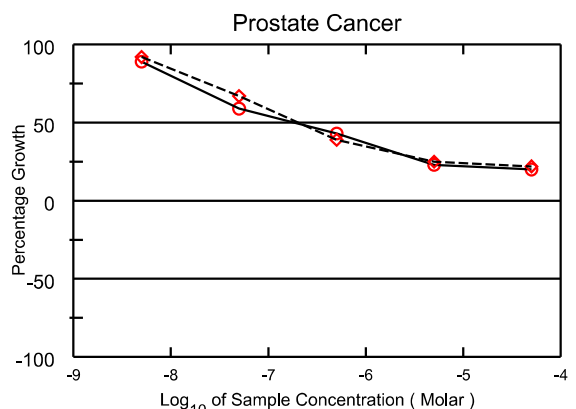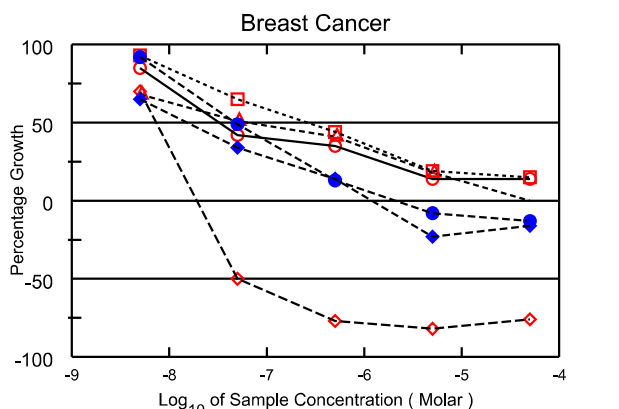

National Cancer Institute Developmental Therapeutics Program  
In-Vitro Testing Results

|                                |  |                                       |  |                |  |               |  |
|--------------------------------|--|---------------------------------------|--|----------------|--|---------------|--|
| NSC : D - 791001 / 1           |  | Experiment ID : 1606NS35              |  | Test Type : 08 |  | Units : Molar |  |
| Report Date : October 22, 2016 |  | Test Date : June 27, 2016             |  | QNS :          |  | MC :          |  |
| COM1 : ZIF-3                   |  | Stain Reagent : SRB Dual-Pass Related |  | SSPL : 1A0E    |  |               |  |

| Panel/Cell Line | Time<br>Zero               | Ctrl  | Log10 Concentration    |       |       |       |       |       |      |      |      |      | Percent Growth | GI50      | TGI       | LC50      |
|-----------------|----------------------------|-------|------------------------|-------|-------|-------|-------|-------|------|------|------|------|----------------|-----------|-----------|-----------|
|                 |                            |       | Mean Optical Densities |       |       |       |       |       |      |      |      |      |                |           |           |           |
|                 |                            |       | -8.3                   | -7.3  | -6.3  | -5.3  | -4.3  | -8.3  | -7.3 | -6.3 | -5.3 | -4.3 |                |           |           |           |
| Leukemia        | CCRF-CEM                   | 0.461 | 2.206                  | 2.022 | 1.513 | 1.123 | 0.679 | 0.667 | 89   | 60   | 38   | 12   | 12             | 1.44E-7   | > 5.00E-5 | > 5.00E-5 |
|                 | HL-60(TB)                  | 1.083 | 3.227                  | 3.236 | 3.021 | 2.398 | 1.079 | 1.021 | 100  | 90   | 61   | 31   | -6             | 7.63E-7   | > 4.92E-6 | > 5.00E-5 |
|                 | K-562                      | 0.291 | 2.158                  | 2.134 | 1.313 | 1.135 | 0.869 | 0.900 | 99   | 55   | 45   | 26   | 23             | 1.57E-7   | > 5.00E-5 | > 5.00E-5 |
|                 | MOLT-4                     | 0.724 | 2.775                  | 2.662 | 2.261 | 2.146 | 1.253 | 1.206 | 94   | 75   | 69   | 26   | 23             | 1.39E-6   | > 5.00E-5 | > 5.00E-5 |
|                 | RPMI-8226                  | 0.958 | 2.741                  | 2.573 | 1.886 | 1.546 | 0.784 | 0.763 | 91   | 52   | 33   | -18  | -20            | 6.39E-8   | > 2.20E-6 | > 5.00E-5 |
|                 | SR                         | 0.525 | 1.822                  | 1.793 | 1.222 | 0.637 | 0.340 | 0.334 | 98   | 54   | 9    | -35  | -36            | 6.06E-8   | > 7.86E-7 | > 5.00E-5 |
|                 | Non-Small Cell Lung Cancer |       |                        |       |       |       |       |       |      |      |      |      |                |           |           |           |
| A549/ATCC       | 0.394                      | 1.610 | 1.172                  | 0.899 | 0.778 | 0.607 | 0.629 | 64    | 42   | 32   | 18   | 19   | 2.09E-8        | > 5.00E-5 | > 5.00E-5 |           |
| EKVX            | 0.601                      | 1.848 | 1.593                  | 1.383 | 1.205 | 0.954 | 0.901 | 80    | 63   | 48   | 28   | 24   | 3.90E-7        | > 5.00E-5 | > 5.00E-5 |           |
| HOP-62          | 0.716                      | 1.525 | 1.509                  | 1.348 | 1.096 | 0.907 | 0.861 | 98    | 78   | 47   | 24   | 18   | 3.99E-7        | > 5.00E-5 | > 5.00E-5 |           |
| HOP-92          | 1.270                      | 1.783 | 1.525                  | 1.319 | 1.227 | 1.125 | 1.098 | 50    | 10   | -3   | -11  | -14  | <              | 5.00E-9   | > 5.00E-5 |           |
| NCI-H226        | 1.017                      | 1.773 | 1.630                  | 1.550 | 1.330 | 1.139 | 1.109 | 81    | 71   | 41   | 16   | 12   | 2.53E-7        | > 5.00E-5 | > 5.00E-5 |           |
| NCI-H23         | 0.524                      | 1.771 | 1.697                  | 1.531 | 1.241 | 0.928 | 0.930 | 94    | 81   | 57   | 32   | 33   | 9.93E-7        | > 5.00E-5 | > 5.00E-5 |           |
| NCI-H322M       | 0.885                      | 2.177 | 1.927                  | 1.969 | 1.713 | 1.319 | 1.177 | 81    | 84   | 64   | 34   | 23   | 1.45E-6        | > 5.00E-5 | > 5.00E-5 |           |
| NCI-H460        | 0.306                      | 2.670 | 2.433                  | 1.550 | 1.230 | 0.620 | 0.565 | 90    | 53   | 39   | 13   | 11   | 7.81E-8        | > 5.00E-5 | > 5.00E-5 |           |
| NCI-H522        | 0.925                      | 1.968 | 1.822                  | 1.604 | 1.424 | 1.008 | 1.057 | 86    | 65   | 48   | 8    | 13   | 3.74E-7        | > 5.00E-5 | > 5.00E-5 |           |
| Colon Cancer    |                            |       |                        |       |       |       |       |       |      |      |      |      |                |           |           |           |
| COLO 205        | 0.469                      | 1.640 | 1.602                  | 1.133 | 0.665 | 0.408 | 0.405 | 97    | 57   | 17   | -13  | -14  | 7.35E-8        | > 5.00E-5 | > 5.00E-5 |           |
| HCC-2998        | 0.837                      | 2.837 | 2.771                  | 2.213 | 2.077 | 1.352 | 1.392 | 97    | 69   | 62   | 26   | 28   | 1.07E-6        | > 5.00E-5 | > 5.00E-5 |           |
| HCT-116         | 0.561                      | 2.999 | 2.612                  | 1.612 | 1.400 | 0.970 | 1.047 | 84    | 43   | 34   | 17   | 20   | 3.39E-8        | > 5.00E-5 | > 5.00E-5 |           |
| HCT-15          | 0.384                      | 2.346 | 2.191                  | 1.848 | 1.119 | 0.783 | 0.731 | 92    | 75   | 37   | 20   | 18   | 2.30E-7        | > 5.00E-5 | > 5.00E-5 |           |
| HT29            | 0.313                      | 1.685 | 1.372                  | 0.904 | 0.610 | 0.326 | 0.302 | 77    | 43   | 22   | 1    | -4   | 3.13E-8        | > 7.90E-6 | > 5.00E-5 |           |
| KM12            | 0.500                      | 2.842 | 2.792                  | 2.020 | 1.300 | 0.869 | 0.828 | 98    | 65   | 34   | 16   | 14   | 1.53E-7        | > 5.00E-5 | > 5.00E-5 |           |
| SW-620          | 0.291                      | 1.770 | 1.603                  | 1.179 | 0.846 | 0.656 | 0.631 | 89    | 60   | 38   | 25   | 23   | 1.40E-7        | > 5.00E-5 | > 5.00E-5 |           |
| CNS Cancer      |                            |       |                        |       |       |       |       |       |      |      |      |      |                |           |           |           |
| SF-268          | 0.578                      | 1.988 | 1.618                  | 1.474 | 1.242 | 0.814 | 0.739 | 74    | 64   | 47   | 17   | 11   | 3.31E-7        | > 5.00E-5 | > 5.00E-5 |           |
| SF-295          | 0.996                      | 2.800 | 2.406                  | 1.550 | 1.232 | 0.956 | 0.860 | 78    | 31   | 13   | -4   | -14  | 1.96E-8        | > 2.89E-6 | > 5.00E-5 |           |
| SF-539          | 1.027                      | 2.912 | 2.670                  | 2.063 | 1.468 | 1.146 | 1.010 | 87    | 55   | 23   | 6    | -2   | 7.16E-8        | > 3.09E-5 | > 5.00E-5 |           |
| SNB-19          | 0.423                      | 1.651 | 1.455                  | 1.183 | 1.035 | 0.810 | 0.727 | 84    | 62   | 50   | 32   | 25   | 4.87E-7        | > 5.00E-5 | > 5.00E-5 |           |
| SNB-75          | 0.868                      | 1.733 | 1.401                  | 1.187 | 0.999 | 0.907 | 0.829 | 62    | 37   | 15   | 5    | -5   | 1.47E-8        | > 1.57E-5 | > 5.00E-5 |           |
| U251            | 0.434                      | 1.737 | 1.408                  | 0.923 | 0.708 | 0.488 | 0.490 | 75    | 38   | 21   | 4    | 4    | 2.31E-8        | > 5.00E-5 | > 5.00E-5 |           |
| Melanoma        |                            |       |                        |       |       |       |       |       |      |      |      |      |                |           |           |           |
| LOX IMVI        | 0.380                      | 2.415 | 2.243                  | 1.129 | 0.186 | 0.124 | 0.106 | 92    | 37   | -51  | -68  | -72  | 2.87E-8        | > 1.31E-7 | > 4.85E-7 |           |
| MALME-3M        | 0.623                      | 1.130 | 1.119                  | 1.043 | 0.941 | 0.694 | 0.669 | 98    | 83   | 63   | 14   | 9    | 9.10E-7        | > 5.00E-5 | > 5.00E-5 |           |
| M14             | 0.574                      | 2.045 | 2.035                  | 1.239 | 0.509 | 0.399 | 0.423 | 99    | 45   | -11  | -30  | -26  | 4.08E-8        | > 3.14E-7 | > 5.00E-5 |           |
| MDA-MB-435      | 0.465                      | 2.368 | 2.165                  | 0.697 | 0.420 | 0.486 | 0.393 | 89    | 12   | -10  | 1    | -16  | 1.62E-8        | > 5.00E-5 | > 5.00E-5 |           |
| SK-MEL-2        | 0.978                      | 1.909 | 1.866                  | 1.758 | 1.502 | 0.939 | 0.861 | 95    | 84   | 56   | -4   | -12  | 6.35E-7        | > 4.29E-6 | > 5.00E-5 |           |
| SK-MEL-28       | 0.742                      | 2.207 | 2.135                  | 1.839 | 1.423 | 1.057 | 0.909 | 95    | 75   | 46   | 22   | 11   | 3.75E-7        | > 5.00E-5 | > 5.00E-5 |           |
| SK-MEL-5        | 0.770                      | 2.691 | 2.554                  | 1.230 | 0.652 | 0.339 | 0.396 | 93    | 24   | -15  | -56  | -49  | 2.09E-8        | > 2.03E-7 | > 5.00E-5 |           |
| UACC-257        | 1.062                      | 2.002 | 1.815                  | 1.473 | 1.230 | 0.934 | 0.851 | 80    | 44   | 18   | -12  | -20  | 3.36E-8        | > 1.98E-6 | > 5.00E-5 |           |
| UACC-62         | 0.761                      | 2.871 | 2.739                  | 2.254 | 1.391 | 0.718 | 0.567 | 94    | 71   | 30   | -6   | -25  | 1.61E-7        | > 3.45E-6 | > 5.00E-5 |           |
| Ovarian Cancer  |                            |       |                        |       |       |       |       |       |      |      |      |      |                |           |           |           |
| IGROV1          | 0.585                      | 2.011 | 1.758                  | 1.408 | 1.254 | 0.989 | 0.940 | 82    | 58   | 47   | 28   | 25   | 2.58E-7        | > 5.00E-5 | > 5.00E-5 |           |
| OVCA3-3         | 0.533                      | 1.990 | 1.892                  | 1.456 | 1.186 | 0.843 | 0.769 | 93    | 63   | 45   | 21   | 16   | 2.62E-7        | > 5.00E-5 | > 5.00E-5 |           |
| OVCA4-4         | 0.776                      | 1.673 | 1.581                  | 1.514 | 1.437 | 1.094 | 1.034 | 90    | 82   | 74   | 35   | 29   | 2.08E-6        | > 5.00E-5 | > 5.00E-5 |           |
| OVCA5-5         | 0.742                      | 1.903 | 1.845                  | 1.729 | 1.587 | 1.211 | 1.077 | 95    | 85   | 73   | 40   | 29   | 2.53E-6        | > 5.00E-5 | > 5.00E-5 |           |
| OVCA8-8         | 0.509                      | 1.908 | 1.775                  | 1.276 | 1.030 | 0.965 | 0.863 | 91    | 55   | 37   | 33   | 25   | 9.42E-8        | > 5.00E-5 | > 5.00E-5 |           |
| NCI/ADR-RES     | 0.502                      | 1.732 | 1.723                  | 1.538 | 1.268 | 0.982 | 0.977 | 99    | 84   | 62   | 39   | 39   | 1.68E-6        | > 5.00E-5 | > 5.00E-5 |           |
| SK-OV-3         | 0.912                      | 2.092 | 1.970                  | 1.791 | 1.604 | 1.355 | 1.252 | 90    | 75   | 59   | 38   | 29   | 1.28E-6        | > 5.00E-5 | > 5.00E-5 |           |
| Renal Cancer    |                            |       |                        |       |       |       |       |       |      |      |      |      |                |           |           |           |
| 786-0           | 0.656                      | 2.211 | 1.904                  | 1.629 | 1.310 | 0.996 | 1.008 | 80    | 63   | 42   | 22   | 23   | 2.05E-7        | > 5.00E-5 | > 5.00E-5 |           |
| A498            | 1.368                      | 2.033 | 1.897                  | 1.768 | 1.645 | 1.498 | 1.368 | 80    | 60   | 42   | 19   | 19   | 1.76E-7        | > 5.00E-5 | > 5.00E-5 |           |
| ACHN            | 0.446                      | 1.962 | 1.922                  | 1.380 | 1.013 | 0.708 | 0.593 | 97    | 62   | 37   | 17   | 10   | 1.51E-7        | > 5.00E-5 | > 5.00E-5 |           |
| RXF 393         | 0.773                      | 1.646 | 1.495                  | 1.184 | 1.003 | 0.870 | 0.851 | 83    | 47   | 26   | 11   | 9    | 4.13E-8        | > 5.00E-5 | > 5.00E-5 |           |
| SN12C           | 0.516                      | 2.184 | 1.840                  | 1.365 | 1.159 | 0.421 | 0.363 | 79    | 51   | 39   | -19  | -30  | 5.92E-8        | > 2.37E-6 | > 5.00E-5 |           |
| TK-10           | 1.079                      | 2.163 | 1.998                  | 1.804 | 1.594 | 1.283 | 1.262 | 85    | 67   | 48   | 19   | 17   | 3.73E-7        | > 3.00E-5 | > 5.00E-5 |           |
| UO-31           | 0.629                      | 1.749 | 1.350                  | 1.147 | 1.080 | 0.857 | 0.768 | 64    | 46   | 40   | 20   | 12   | 3.11E-8        | > 5.00E-5 | > 5.00E-5 |           |
| Prostate Cancer |                            |       |                        |       |       |       |       |       |      |      |      |      |                |           |           |           |
| PC-3            | 0.617                      | 1.662 | 1.547                  | 1.234 | 1.067 | 0.862 | 0.830 | 89    | 59   | 43   | 23   | 20   | 1.83E-7        | > 5.00E-5 | > 5.00E-5 |           |
| DU-145          | 0.388                      | 1.689 | 1.581                  | 1.254 | 0.894 | 0.715 | 0.674 | 92    | 67   | 39   | 25   | 22   | 1.98E-7        | > 5.00E-5 | > 5.00E-5 |           |
| Breast Cancer   |                            |       |                        |       |       |       |       |       |      |      |      |      |                |           |           |           |
| MCF7            | 0.444                      | 2.051 | 1.817                  | 1.117 | 1.014 | 0.673 | 0.661 | 85    | 42   | 35   | 14   | 14   | 3.25E-8        | > 5.00E-5 | > 5.00E-5 |           |
| MDA-MB-231/ATCC | 0.547                      | 1.366 | 1.121                  | 0.273 | 0.127 | 0.096 | 0.130 | 70    | -50  | -77  | -82  | -76  | 7.34E-9        | > 1.91E-8 | > 4.99E-8 |           |
| HS 578T         | 1.100                      | 2.018 | 1.725                  | 1.565 | 1.472 | 1.265 | 1.104 | 68    | 51   | 41   | 18   | 18   | 5.82E-8        | > 5.00E-5 | > 5.00E-5 |           |
| BT-549          | 1.182                      | 2.274 | 2.195                  | 1.888 | 1.663 | 1.388 | 1.348 | 93    | 65   | 44   | 19   | 15   | 2.56E-7        | > 5.00E-5 | > 5.00E-5 |           |
| T-47D           | 0.873                      | 1.607 | 1.547                  | 1.231 | 0.965 | 0.803 | 0.757 | 92    | 49   | 13   | -8   | -13  | 4.67E-8        | > 2.04E-6 | > 5.00E-5 |           |
| MDA-MB-468      | 0.706                      | 1.423 | 1.172                  | 0.949 | 0.807 | 0.546 | 0.593 | 65    | 34   | 14   | -23  | -16  | 1.51E-8        | > 1.21E-6 | > 5.00E-5 |           |



All Cell Lines

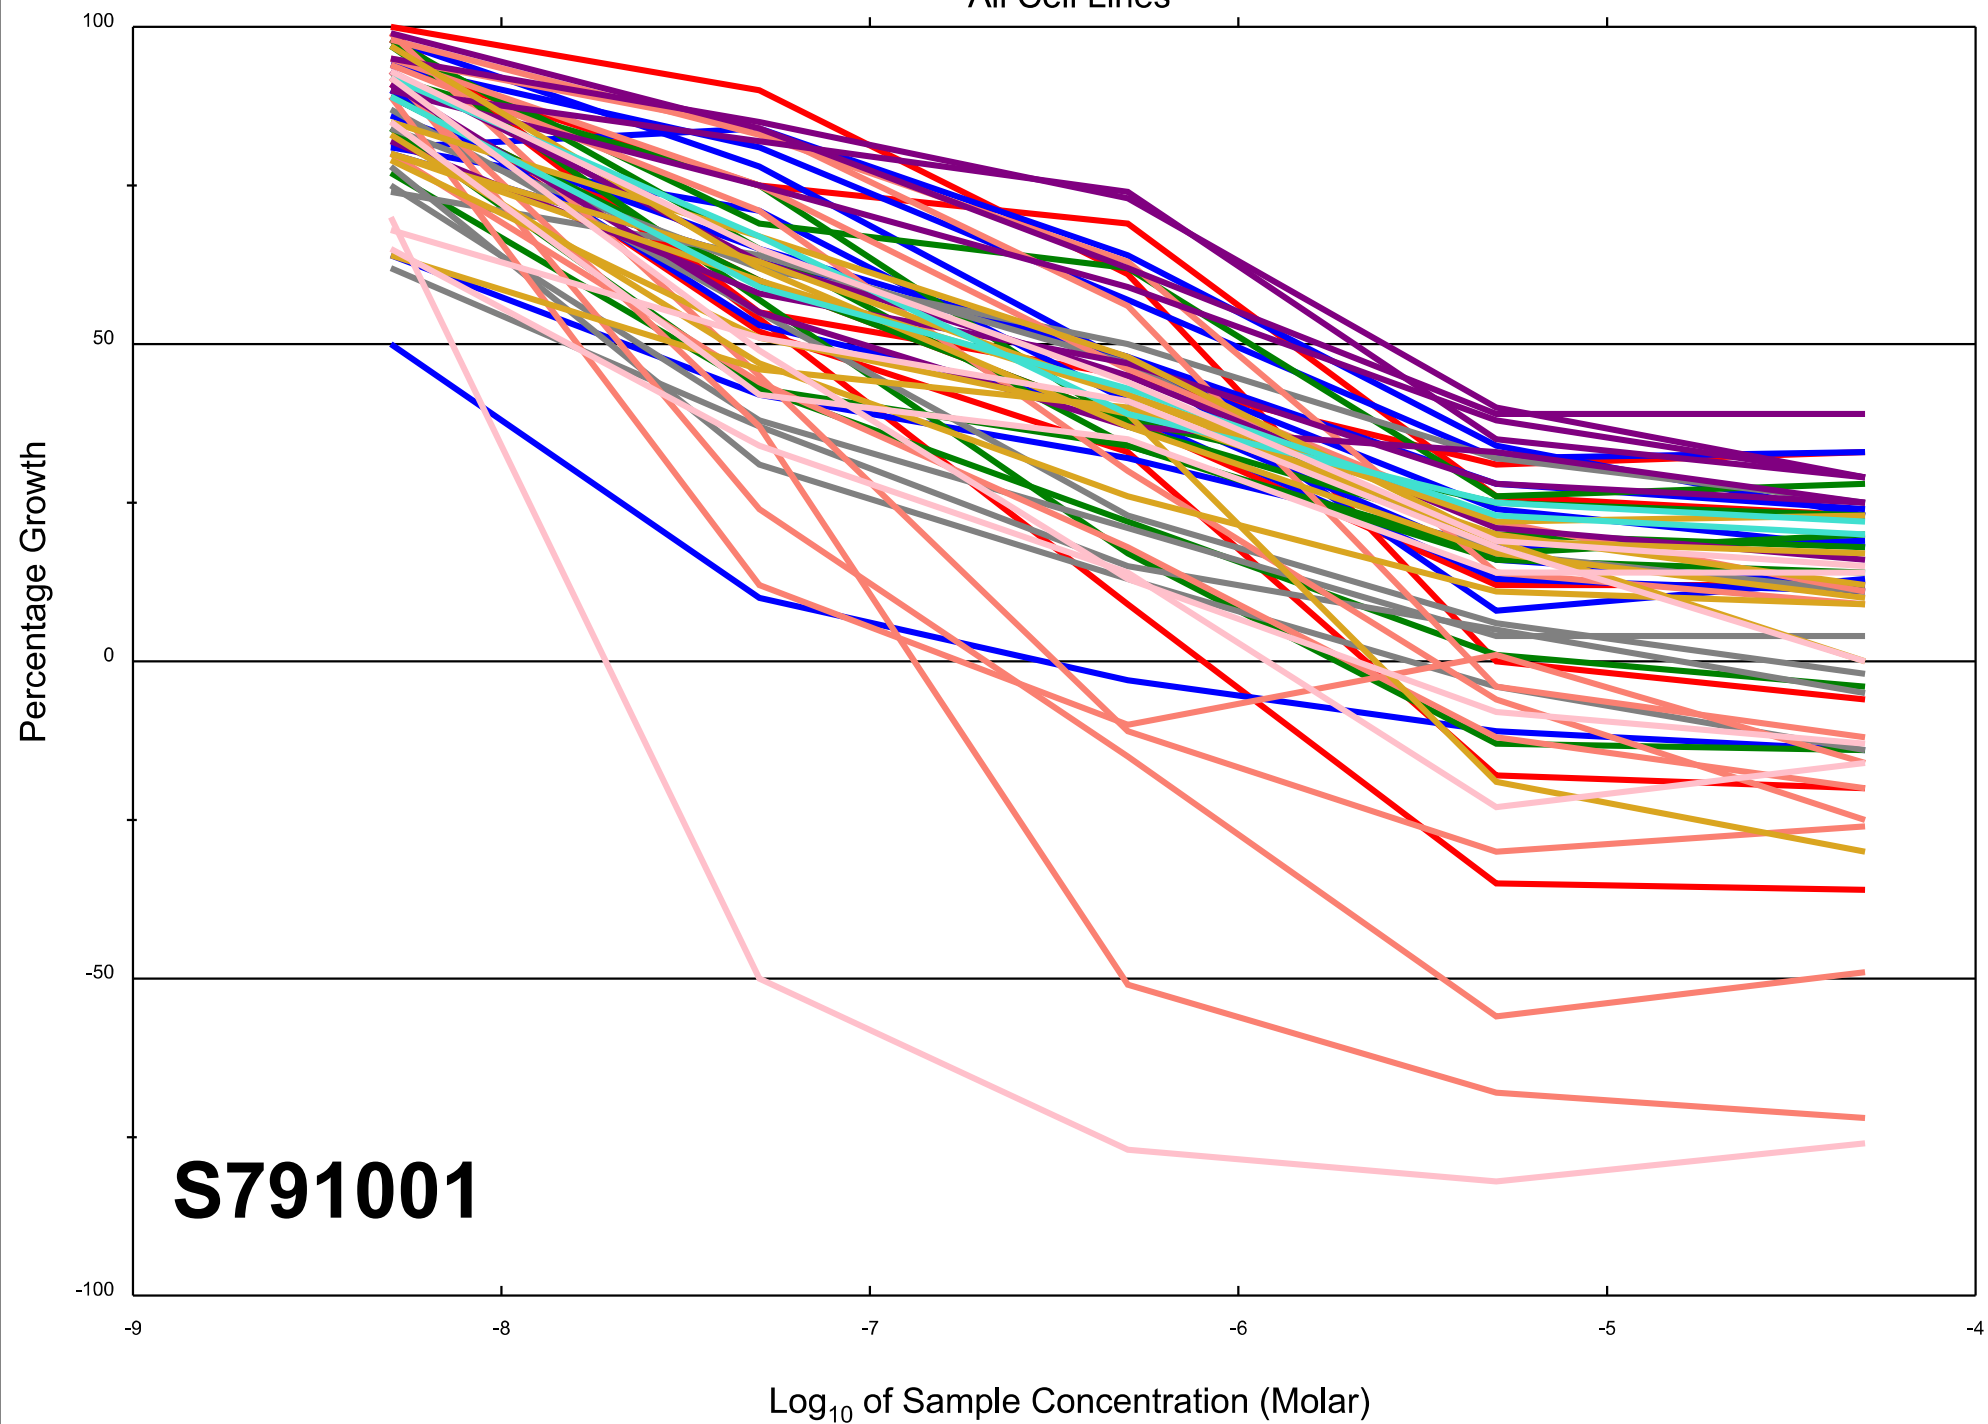

Supplement: s1 [file s1]
