# Supplementary material for: Synthesis, Biological Evaluation and Docking Studies of Ring-Opened Analogues of Ipomoeassin F
Source: MDPI journal article supplement (doi:10.3390/molecules27144419), 2022-07-10

## **Supplementary Material S3:**

### **Synthesis, Biological Evaluation and Docking Studies of Ring-Opened Analogues of Ipomoeassin F**

Sarah O'Keefe, Pratiti Bhadra, Kwabena B. Duah, Guanghui Zong, Levis Tenay, Lauren Andrews, Hayden Schneider, Ashley Anderson, Zhijian Hu, Hazim S. Aljewari, Belinda S. Hall, *Rachel E. Simmonds*, Volkhard Helms, Stephen High and Wei Q. Shi

## Table of Contents

|    |                                           |     |
|----|-------------------------------------------|-----|
| 1  | <sup>1</sup> H NMR spectrum of <b>S2</b>  | S4  |
| 2  | <sup>13</sup> C NMR spectrum of <b>S2</b> | S4  |
| 3  | COSY NMR spectrum of <b>S2</b>            | S5  |
| 4  | HSQC NMR spectrum of <b>S2</b>            | S5  |
| 5  | <sup>1</sup> H NMR spectrum of <b>S3</b>  | S6  |
| 6  | <sup>13</sup> C NMR spectrum of <b>S3</b> | S6  |
| 7  | COSY NMR spectrum of <b>S3</b>            | S7  |
| 8  | HSQC NMR spectrum of <b>S3</b>            | S7  |
| 9  | HMBC NMR spectrum of <b>S3</b>            | S8  |
| 10 | <sup>1</sup> H NMR spectrum of <b>4</b>   | S8  |
| 11 | <sup>13</sup> C NMR spectrum of <b>4</b>  | S9  |
| 12 | COSY NMR spectrum of <b>4</b>             | S9  |
| 13 | HSQC NMR spectrum of <b>4</b>             | S10 |
| 14 | HMBC NMR spectrum of <b>4</b>             | S10 |
| 15 | <sup>1</sup> H NMR spectrum of <b>5</b>   | S11 |
| 16 | <sup>13</sup> C NMR spectrum of <b>5</b>  | S11 |
| 17 | COSY NMR spectrum of <b>5</b>             | S12 |
| 18 | HSQC NMR spectrum of <b>5</b>             | S12 |
| 19 | <sup>1</sup> H NMR spectrum of <b>6</b>   | S13 |
| 20 | <sup>13</sup> C NMR spectrum of <b>6</b>  | S13 |
| 21 | COSY NMR spectrum of <b>6</b>             | S14 |
| 22 | HSQC NMR spectrum of <b>6</b>             | S14 |
| 23 | HMBC NMR spectrum of <b>6</b>             | S15 |
| 24 | <sup>1</sup> H NMR spectrum of <b>7</b>   | S15 |
| 25 | <sup>13</sup> C NMR spectrum of <b>7</b>  | S16 |
| 26 | COSY NMR spectrum of <b>7</b>             | S16 |
| 27 | HSQC NMR spectrum of <b>7</b>             | S17 |

|    |                                           |     |
|----|-------------------------------------------|-----|
| 28 | <sup>1</sup> H NMR spectrum of <b>8</b>   | S17 |
| 29 | <sup>13</sup> C NMR spectrum of <b>8</b>  | S18 |
| 30 | COSY NMR spectrum of <b>8</b>             | S18 |
| 31 | HSQC NMR spectrum of <b>8</b>             | S19 |
| 32 | HMBC NMR spectrum of <b>8</b>             | S19 |
| 33 | <sup>1</sup> H NMR spectrum of <b>9</b>   | S20 |
| 34 | <sup>13</sup> C NMR spectrum of <b>9</b>  | S20 |
| 35 | COSY NMR spectrum of <b>9</b>             | S21 |
| 36 | HSQC NMR spectrum of <b>9</b>             | S21 |
| 37 | HMBC NMR spectrum of <b>9</b>             | S22 |
| 38 | <sup>1</sup> H NMR spectrum of <b>10</b>  | S22 |
| 39 | <sup>13</sup> C NMR spectrum of <b>10</b> | S23 |
| 40 | COSY NMR spectrum of <b>10</b>            | S23 |
| 41 | HSQC NMR spectrum of <b>10</b>            | S24 |
| 42 | HMBC NMR spectrum of <b>10</b>            | S24 |
| 43 | <sup>1</sup> H NMR spectrum of <b>11</b>  | S25 |
| 44 | <sup>13</sup> C NMR spectrum of <b>11</b> | S25 |
| 45 | COSY NMR spectrum of <b>11</b>            | S26 |
| 46 | HSQC NMR spectrum of <b>11</b>            | S26 |
| 47 | HMBC NMR spectrum of <b>11</b>            | S27 |
| 48 | <sup>1</sup> H NMR spectrum of <b>12</b>  | S27 |
| 49 | <sup>13</sup> C NMR spectrum of <b>12</b> | S28 |
| 50 | COSY NMR spectrum of <b>12</b>            | S28 |
| 51 | HSQC NMR spectrum of <b>12</b>            | S29 |
| 52 | <sup>1</sup> H NMR spectrum of <b>28</b>  | S30 |
| 53 | <sup>13</sup> C NMR spectrum of <b>28</b> | S30 |
| 54 | <sup>1</sup> H NMR spectrum of <b>S8</b>  | S31 |

|    |                                           |     |
|----|-------------------------------------------|-----|
| 55 | <sup>13</sup> C NMR spectrum of <b>S8</b> | S31 |
| 56 | COSY NMR spectrum of <b>S8</b>            | S32 |
| 57 | HMQC NMR spectrum of <b>S8</b>            | S32 |
| 58 | <sup>1</sup> H NMR spectrum of <b>S9</b>  | S33 |
| 59 | <sup>13</sup> C NMR spectrum of <b>S9</b> | S33 |
| 60 | COSY NMR spectrum of <b>S9</b>            | S34 |
| 61 | HMQC NMR spectrum of <b>S9</b>            | S34 |
| 62 | <sup>1</sup> H NMR spectrum of <b>24</b>  | S35 |
| 63 | <sup>13</sup> C NMR spectrum of <b>24</b> | S35 |
| 64 | COSY NMR spectrum of <b>24</b>            | S36 |
| 65 | HMQC NMR spectrum of <b>24</b>            | S36 |
| 66 | <sup>1</sup> H NMR spectrum of <b>25</b>  | S37 |
| 67 | <sup>13</sup> C NMR spectrum of <b>25</b> | S37 |
| 68 | COSY NMR spectrum of <b>25</b>            | S38 |
| 69 | HMQC NMR spectrum of <b>25</b>            | S38 |
| 70 | <sup>1</sup> H NMR spectrum of <b>26</b>  | S39 |
| 71 | <sup>13</sup> C NMR spectrum of <b>26</b> | S39 |
| 72 | COSY NMR spectrum of <b>26</b>            | S40 |
| 73 | HMQC NMR spectrum of <b>26</b>            | S40 |
| 74 | <sup>1</sup> H NMR spectrum of <b>27</b>  | S41 |
| 75 | <sup>13</sup> C NMR spectrum of <b>27</b> | S41 |
| 76 | COSY NMR spectrum of <b>27</b>            | S42 |

|    |                                           |     |
|----|-------------------------------------------|-----|
| 77 | HMQC NMR spectrum of <b>27</b>            | S42 |
| 78 | <sup>1</sup> H NMR spectrum of <b>29</b>  | S43 |
| 79 | <sup>13</sup> C NMR spectrum of <b>29</b> | S43 |
| 80 | COSY NMR spectrum of <b>29</b>            | S44 |
| 81 | HMQC NMR spectrum of <b>29</b>            | S44 |
| 82 | <sup>1</sup> H NMR spectrum of <b>30</b>  | S45 |
| 83 | <sup>13</sup> C NMR spectrum of <b>30</b> | S45 |
| 84 | COSY NMR spectrum of <b>30</b>            | S46 |
| 85 | HMQC NMR spectrum of <b>30</b>            | S46 |
| 86 | <sup>1</sup> H NMR spectrum of <b>31</b>  | S47 |
| 87 | <sup>13</sup> C NMR spectrum of <b>31</b> | S47 |
| 88 | COSY NMR spectrum of <b>31</b>            | S48 |
| 89 | HMQC NMR spectrum of <b>31</b>            | S48 |
| 90 | <sup>1</sup> H NMR spectrum of <b>32</b>  | S49 |
| 91 | <sup>13</sup> C NMR spectrum of <b>32</b> | S49 |
| 92 | COSY NMR spectrum of <b>32</b>            | S50 |
| 93 | HMQC NMR spectrum of <b>32</b>            | S50 |
| 94 | <sup>1</sup> H NMR spectrum of <b>3</b>   | S51 |
| 95 | <sup>13</sup> C NMR spectrum of <b>3</b>  | S51 |
| 96 | COSY NMR spectrum of <b>3</b>             | S52 |
| 97 | HMQC NMR spectrum of <b>3</b>             | S52 |
| 98 | HMBC NMR spectrum of <b>3</b>             | S53 |

$^1\text{H}$  NMR spectrum of **S2** ( $\text{CDCl}_3$ , 400 MHz)

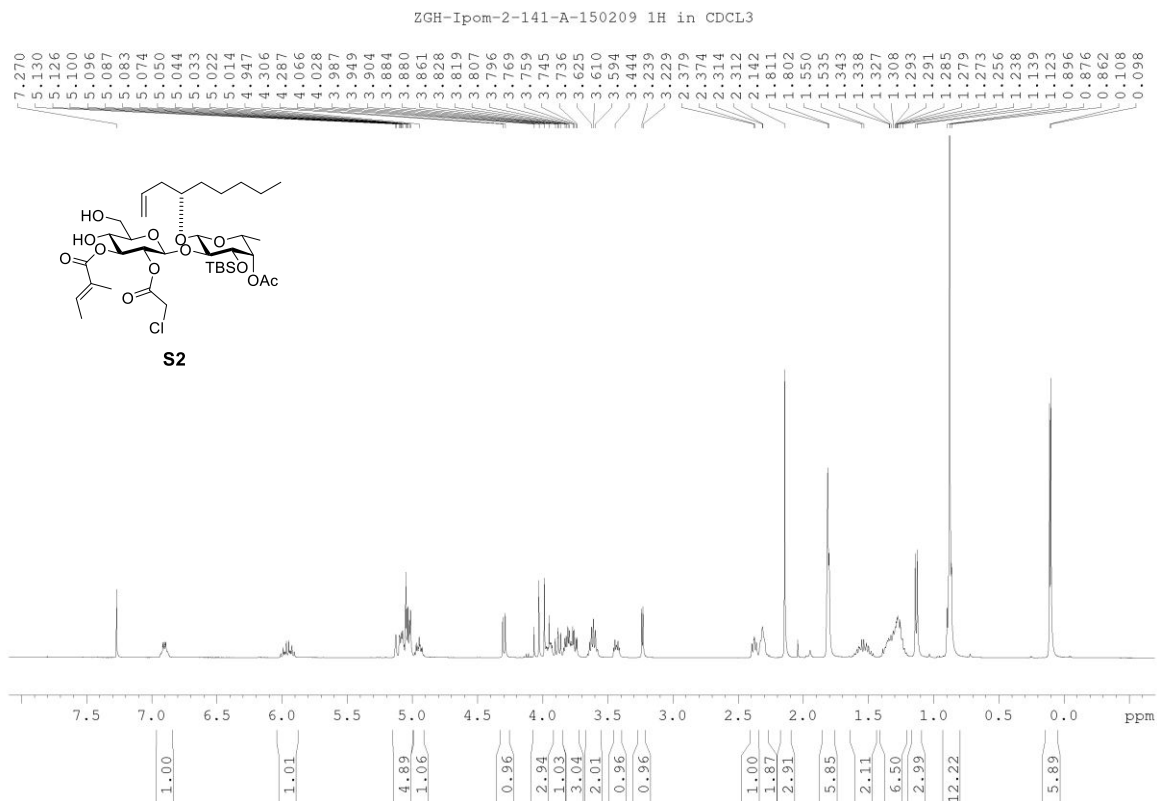

$^{13}\text{C}$  NMR spectrum of **S2** ( $\text{CDCl}_3$ , 400 MHz)

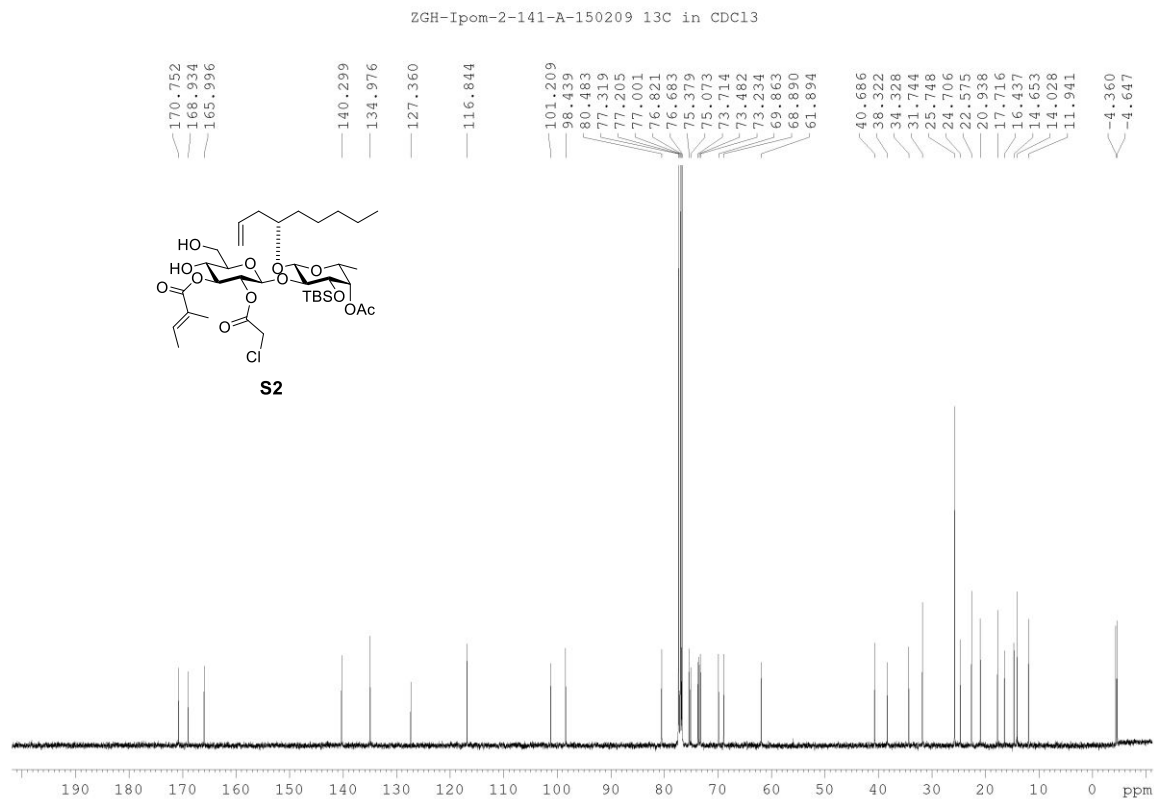



# COSY NMR spectrum of **S2** (CDCl<sub>3</sub>, 400 MHz)

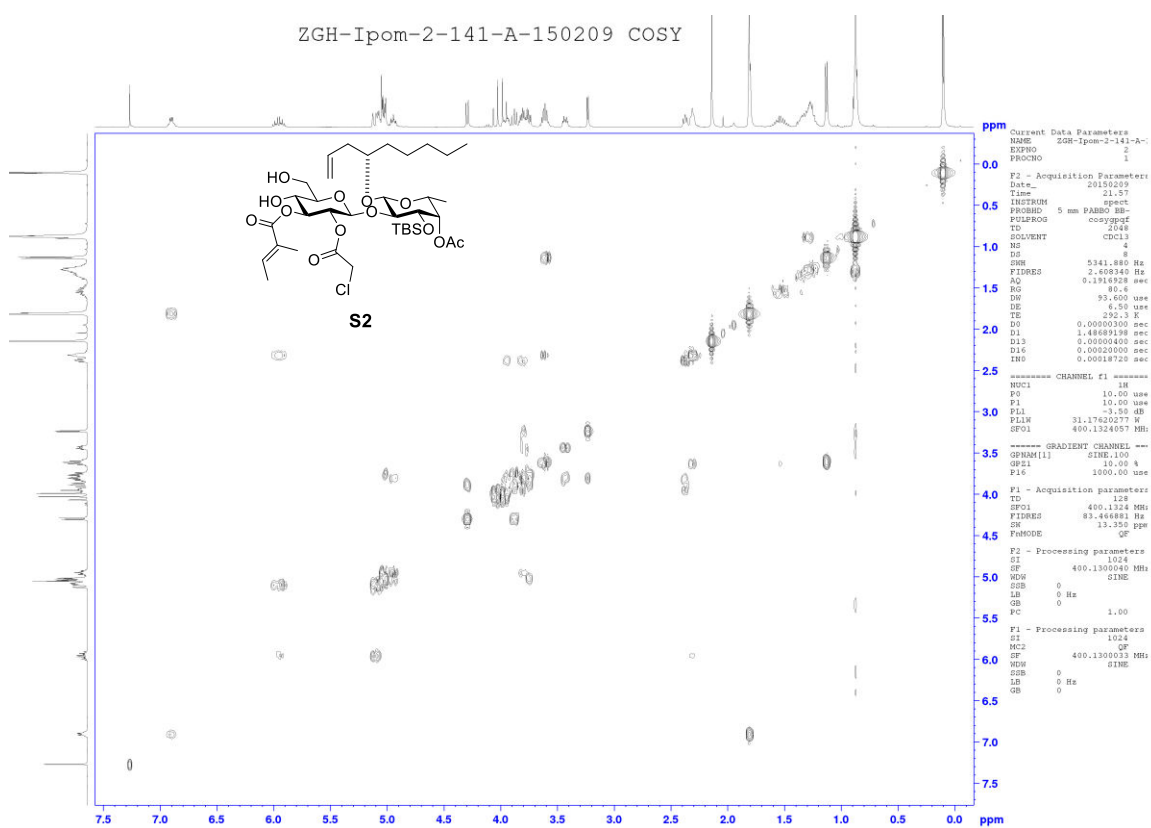

# HSQC NMR spectrum of **S2** (CDCl<sub>3</sub>, 400 MHz)

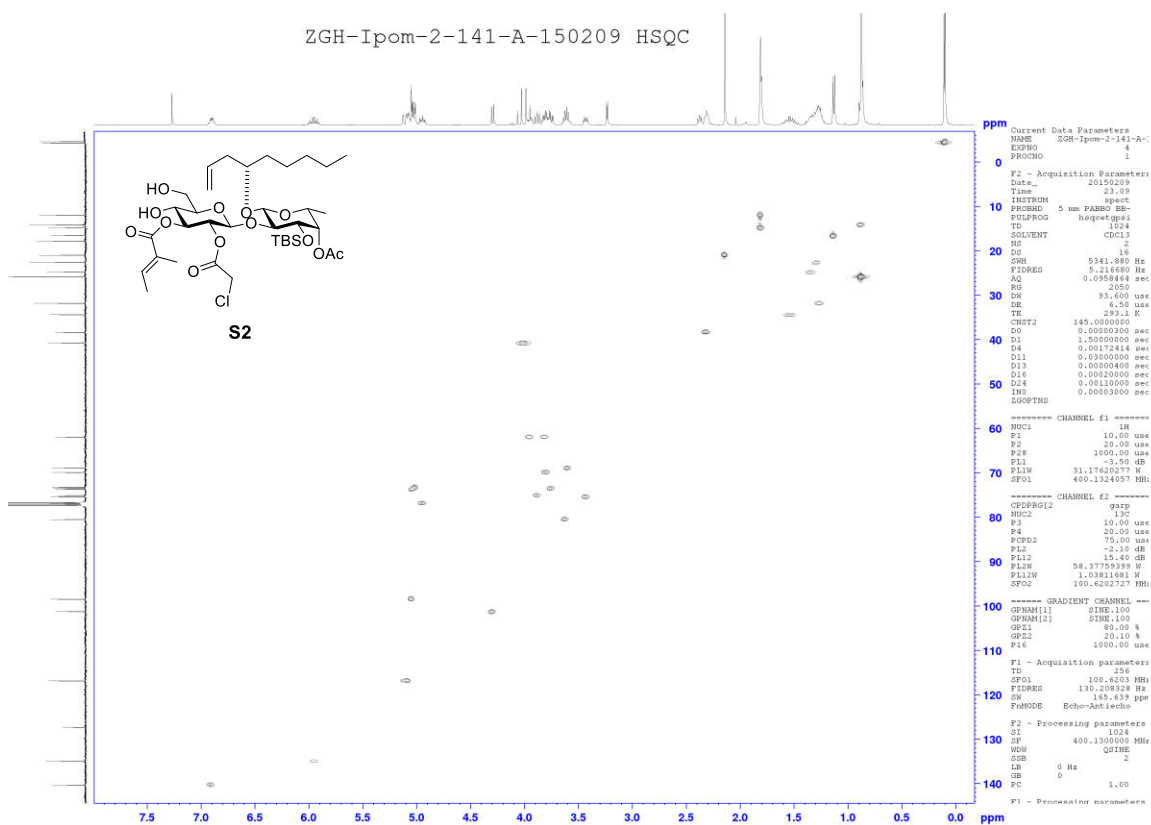

$^1\text{H}$  NMR spectrum of **S3** ( $\text{CDCl}_3$ , 400 MHz)

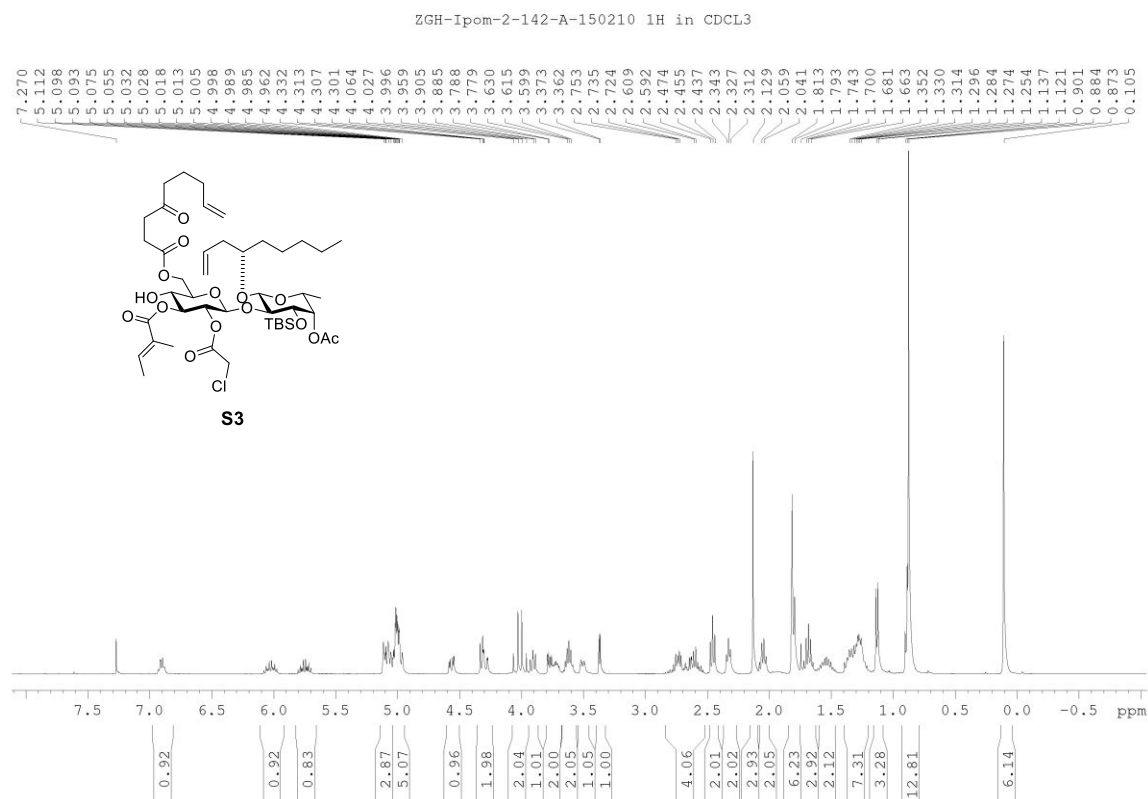

$^{13}\text{C}$  NMR spectrum of **S3** ( $\text{CDCl}_3$ , 400 MHz)

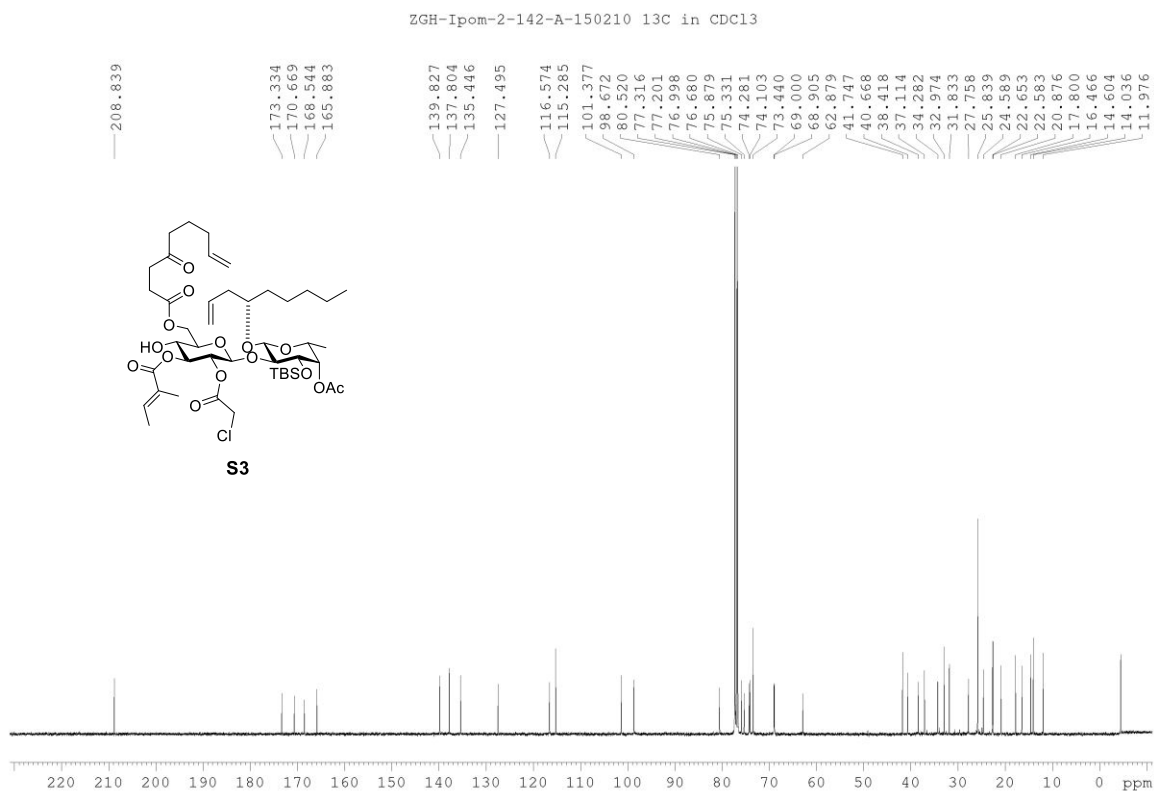

# COSY NMR spectrum of **S3** (CDCl<sub>3</sub>, 400 MHz)

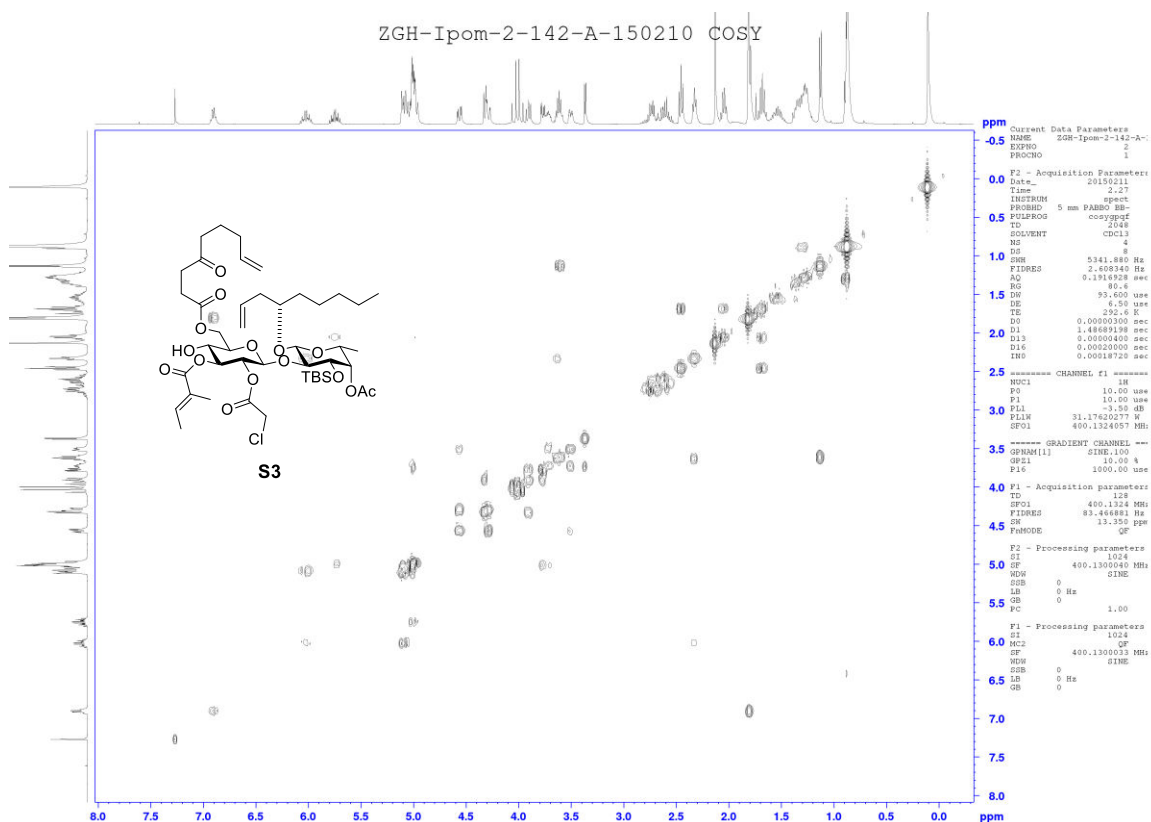

# HSQC NMR spectrum of **S3** (CDCl<sub>3</sub>, 400 MHz)

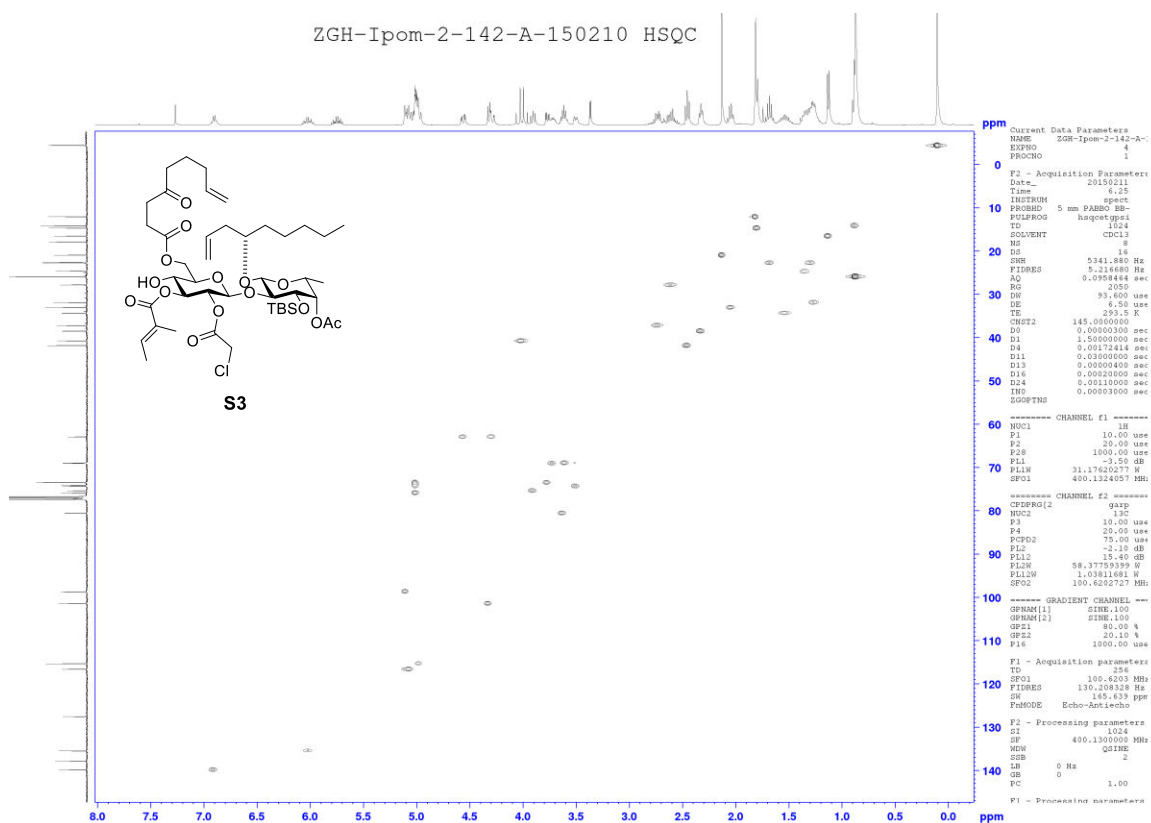

# HMBC NMR spectrum of **S3** (CDCl<sub>3</sub>, 400 MHz)

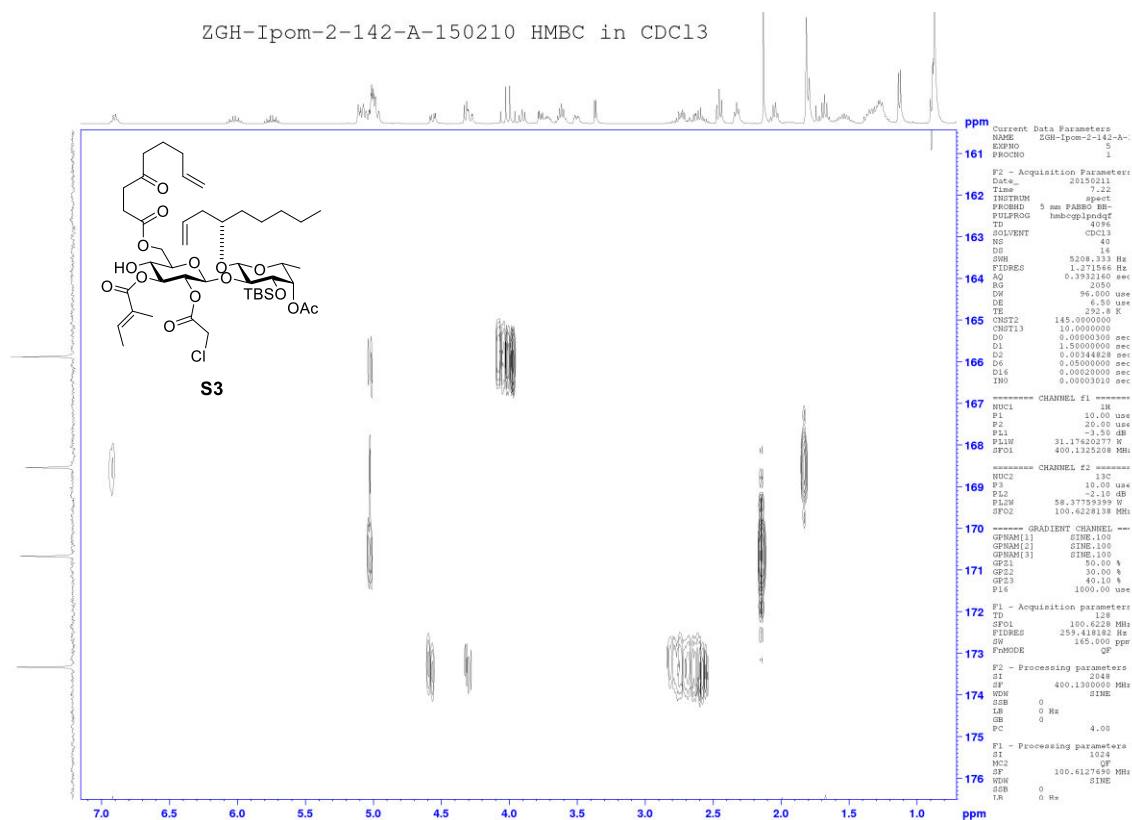

# <sup>1</sup>H NMR spectrum of **4** (CDCl<sub>3</sub>, 400 MHz)

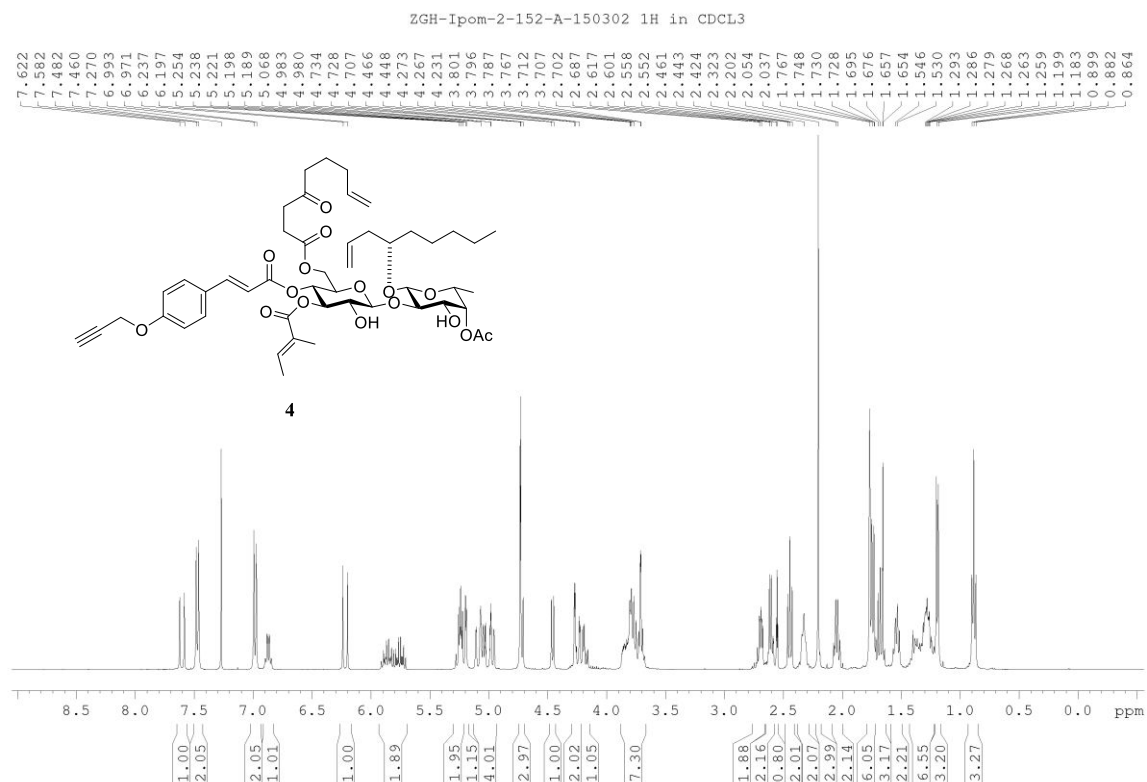

$^{13}\text{C}$  NMR spectrum of **4** ( $\text{CDCl}_3$ , 400 MHz)

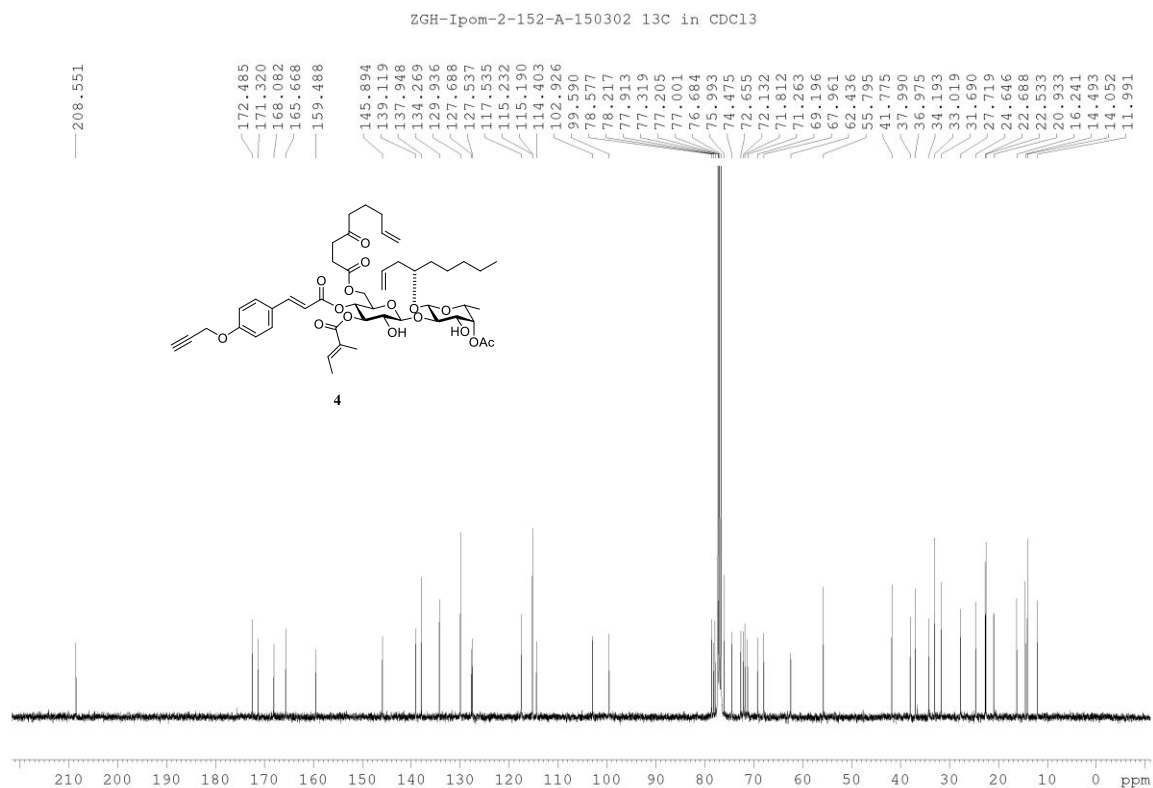

COSY NMR spectrum of **4** ( $\text{CDCl}_3$ , 400 MHz)

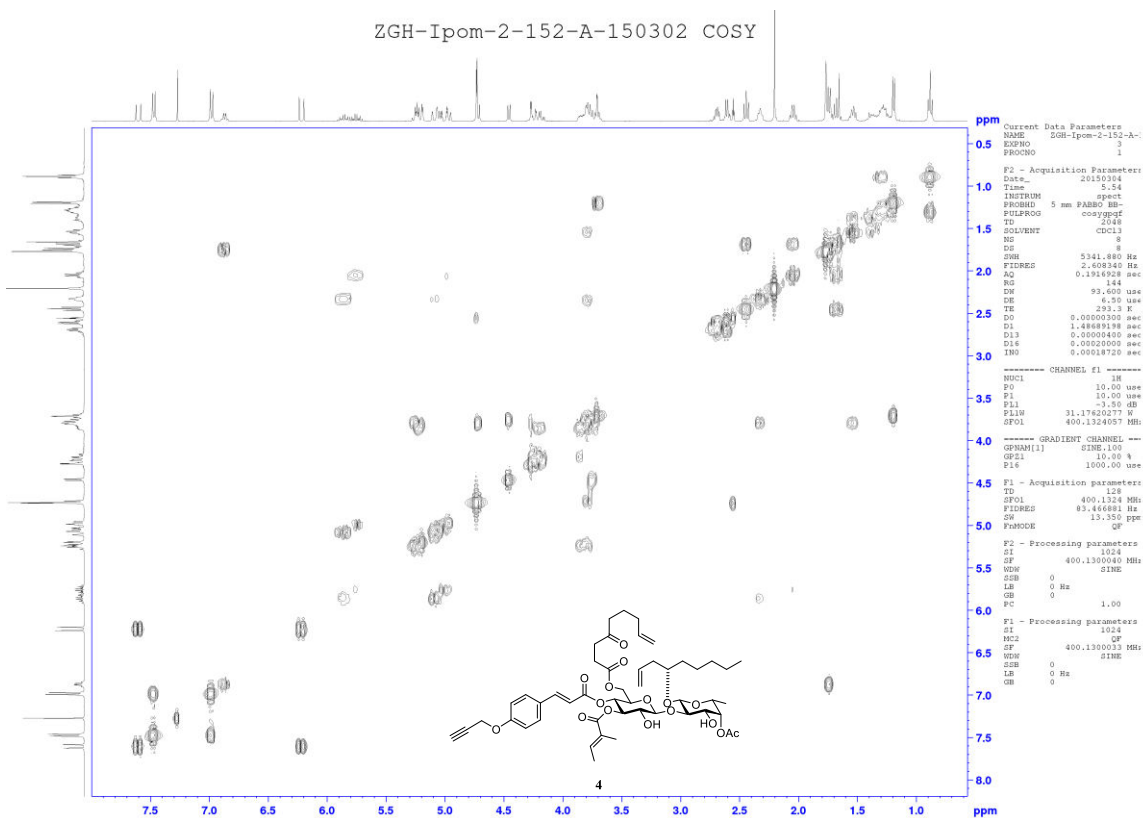

# HSQC NMR spectrum of **4** (CDCl<sub>3</sub>, 400 MHz)

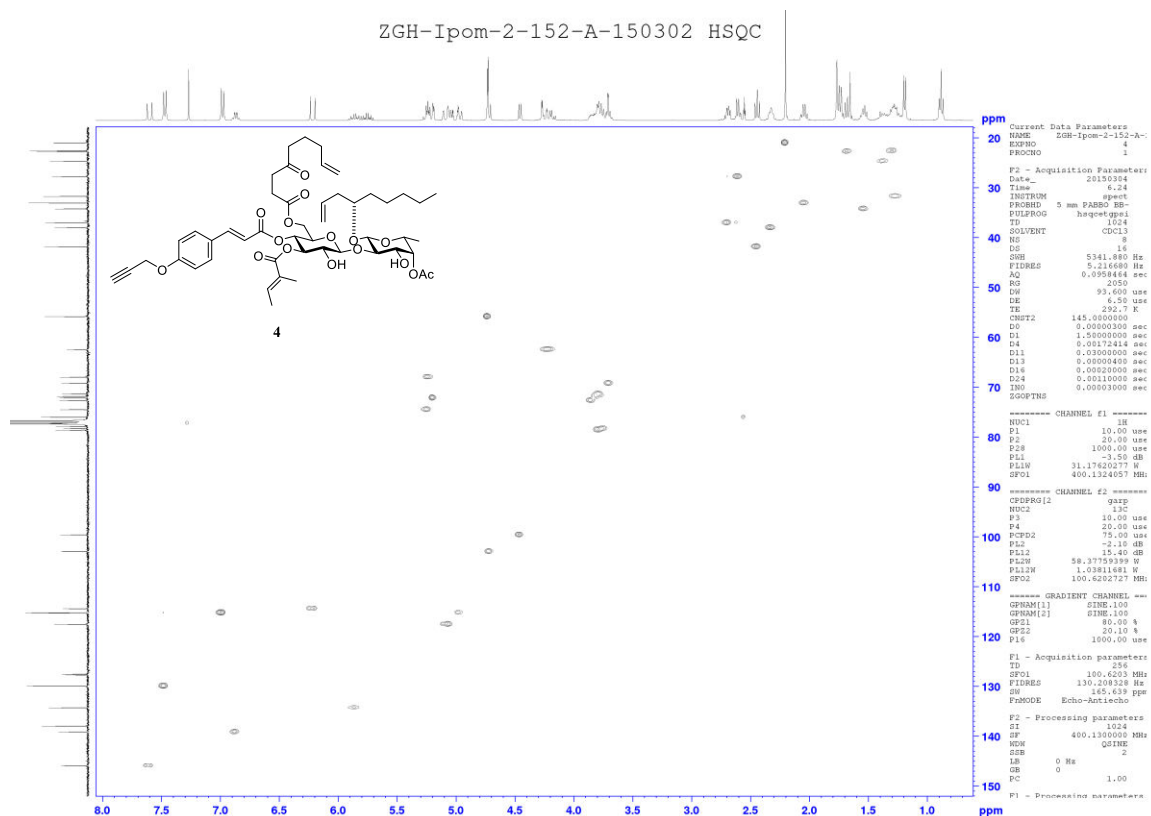

# HMBC NMR spectrum of **4** (CDCl<sub>3</sub>, 400 MHz)

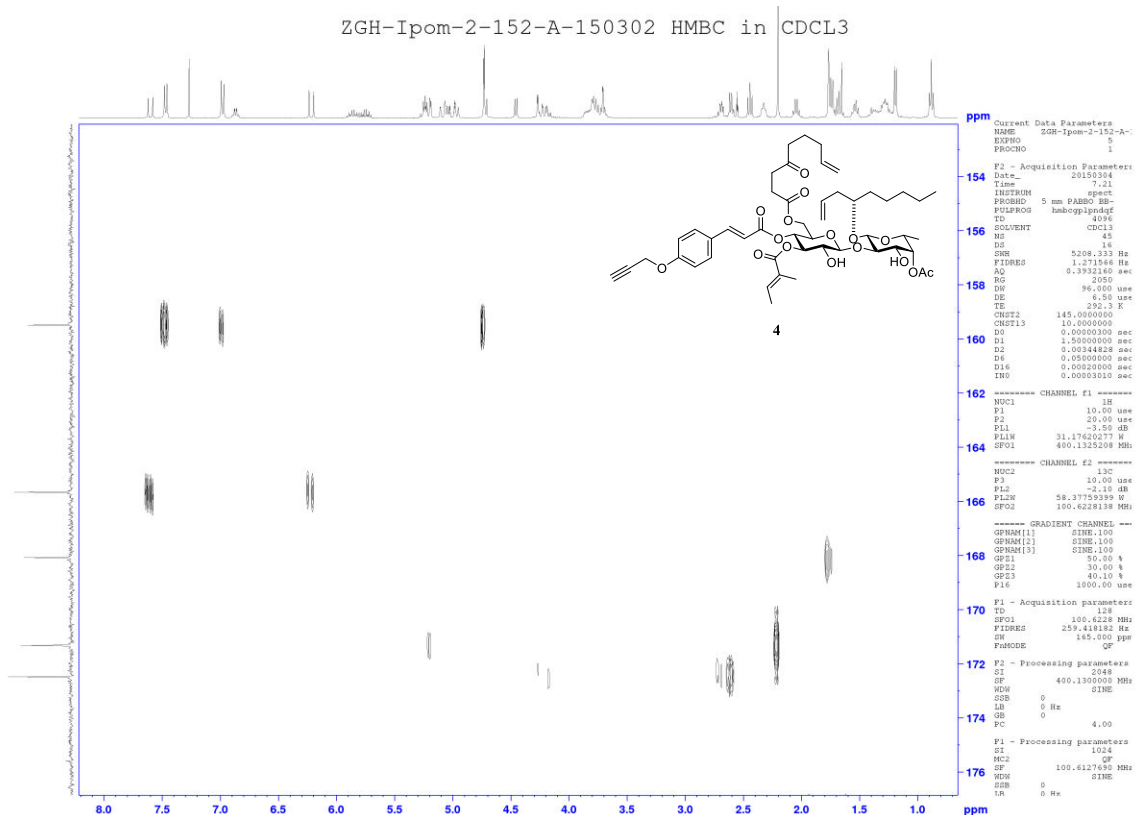

$^1\text{H}$  NMR spectrum of **5** ( $\text{CDCl}_3$ , 400 MHz)

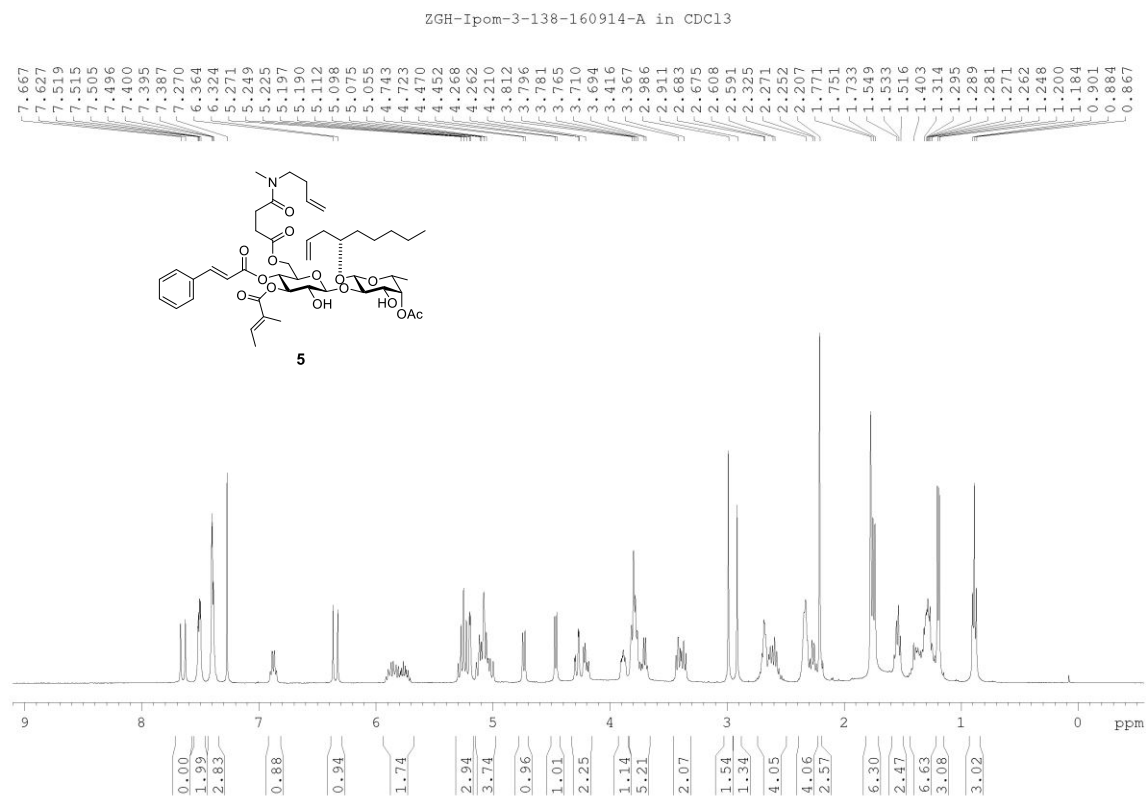

$^{13}\text{C}$  NMR spectrum of **5** ( $\text{CDCl}_3$ , 400 MHz)

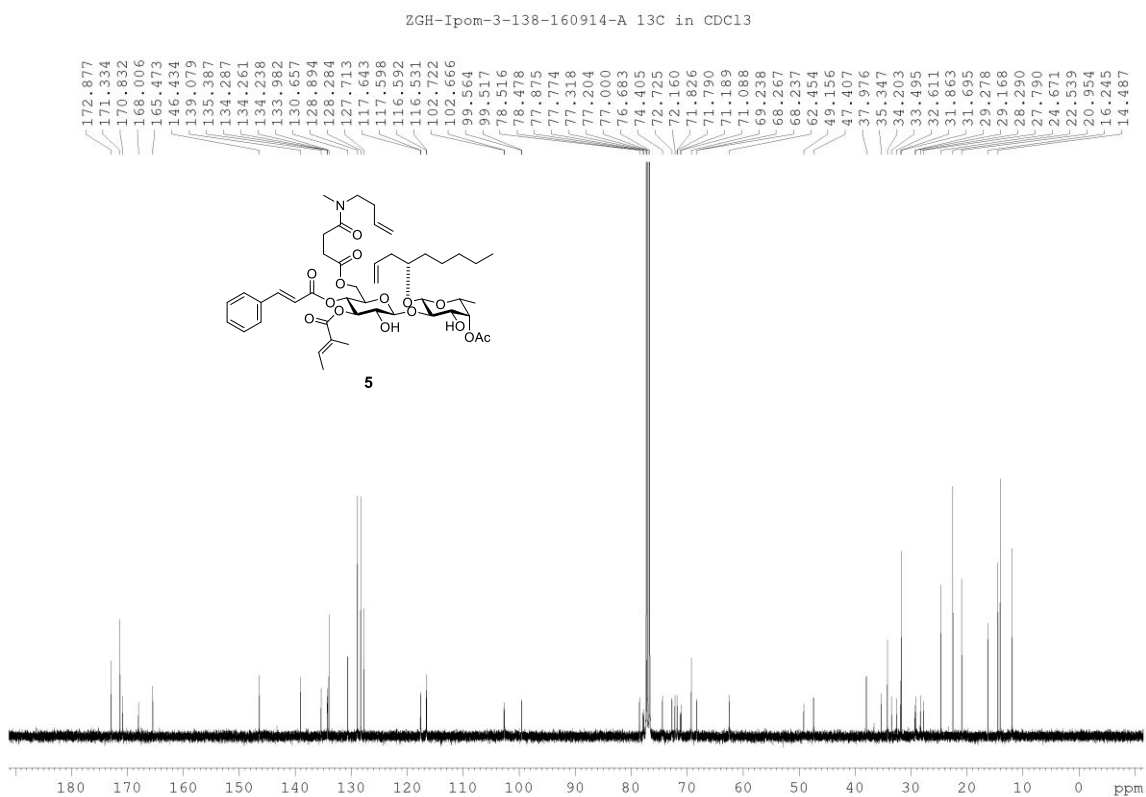

# COSY NMR spectrum of **5** (CDCl<sub>3</sub>, 400 MHz)

ZGH-Ipom-3-138-160914-A in CDCl<sub>3</sub>

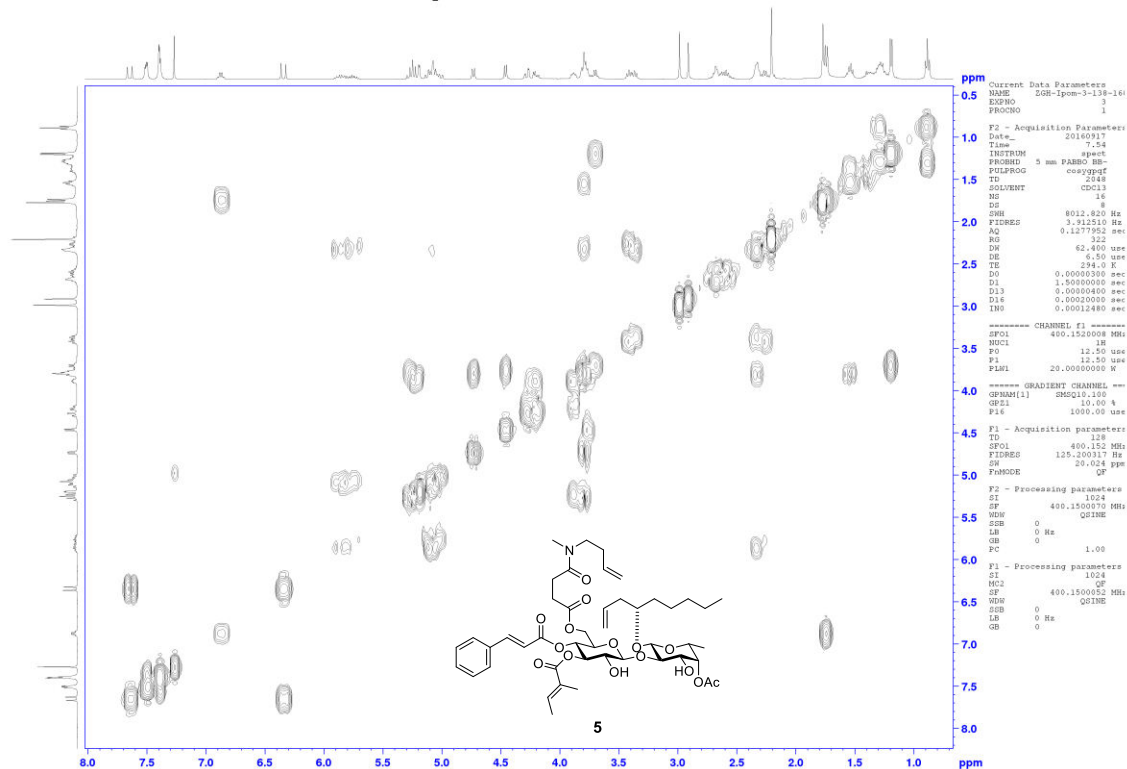

# HSQC NMR spectrum of **5** (CDCl<sub>3</sub>, 400 MHz)

ZGH-Ipom-3-138-160914-A HSQC in CDCl<sub>3</sub>

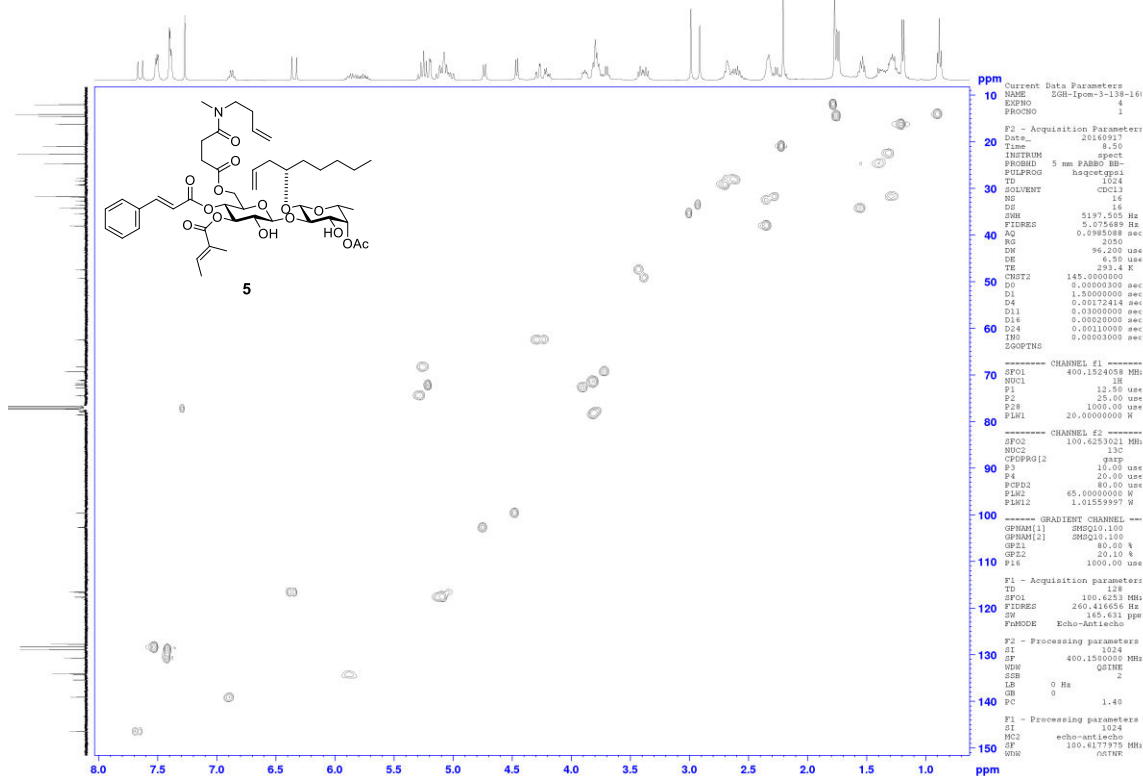



$^1\text{H}$  NMR spectrum of **6** ( $\text{CDCl}_3$ , 400 MHz)

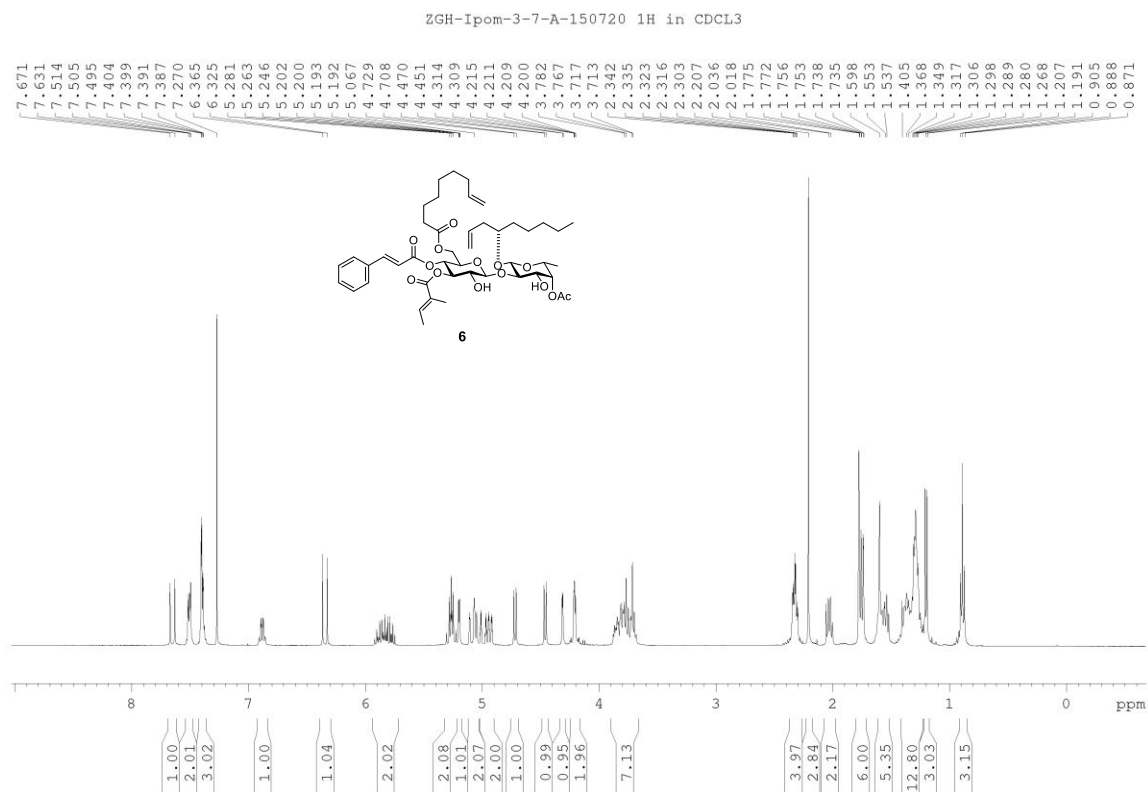

$^{13}\text{C}$  NMR spectrum of **6** ( $\text{CDCl}_3$ , 400 MHz)

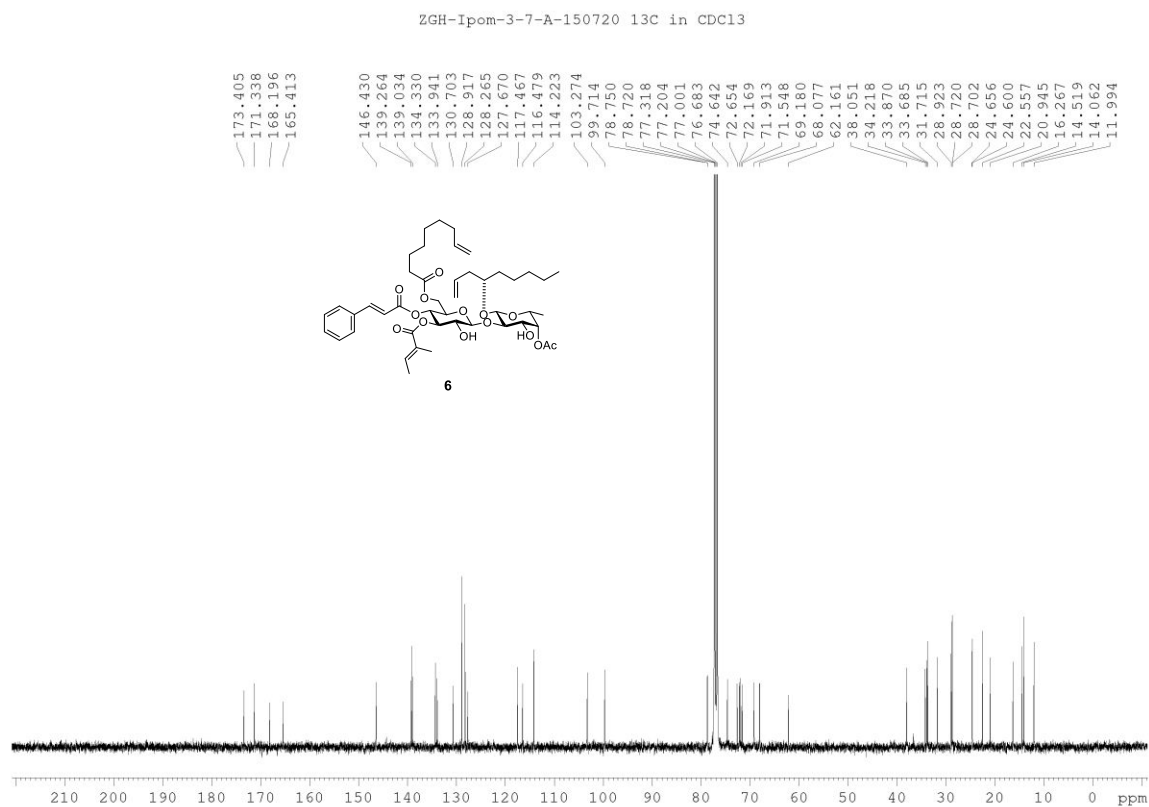

# COSY NMR spectrum of **6** (CDCl<sub>3</sub>, 400 MHz)

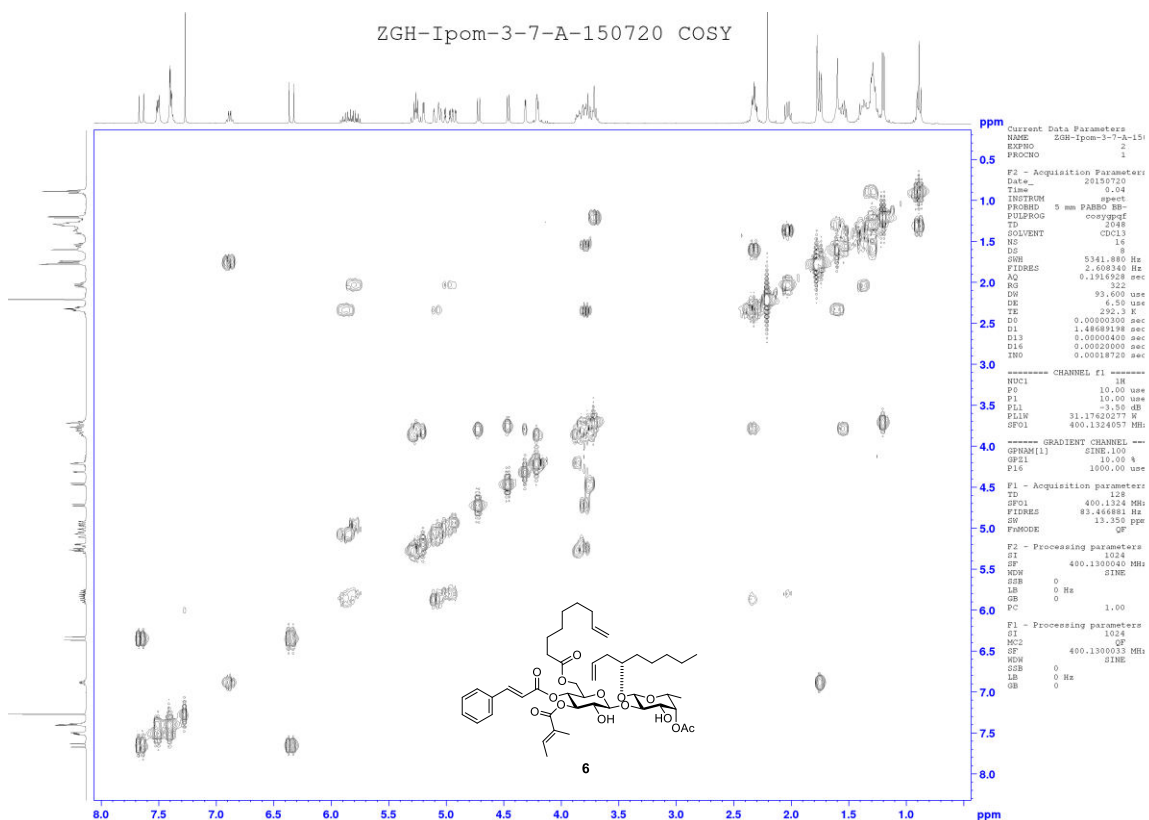

# HSQC NMR spectrum of **6** (CDCl<sub>3</sub>, 400 MHz)

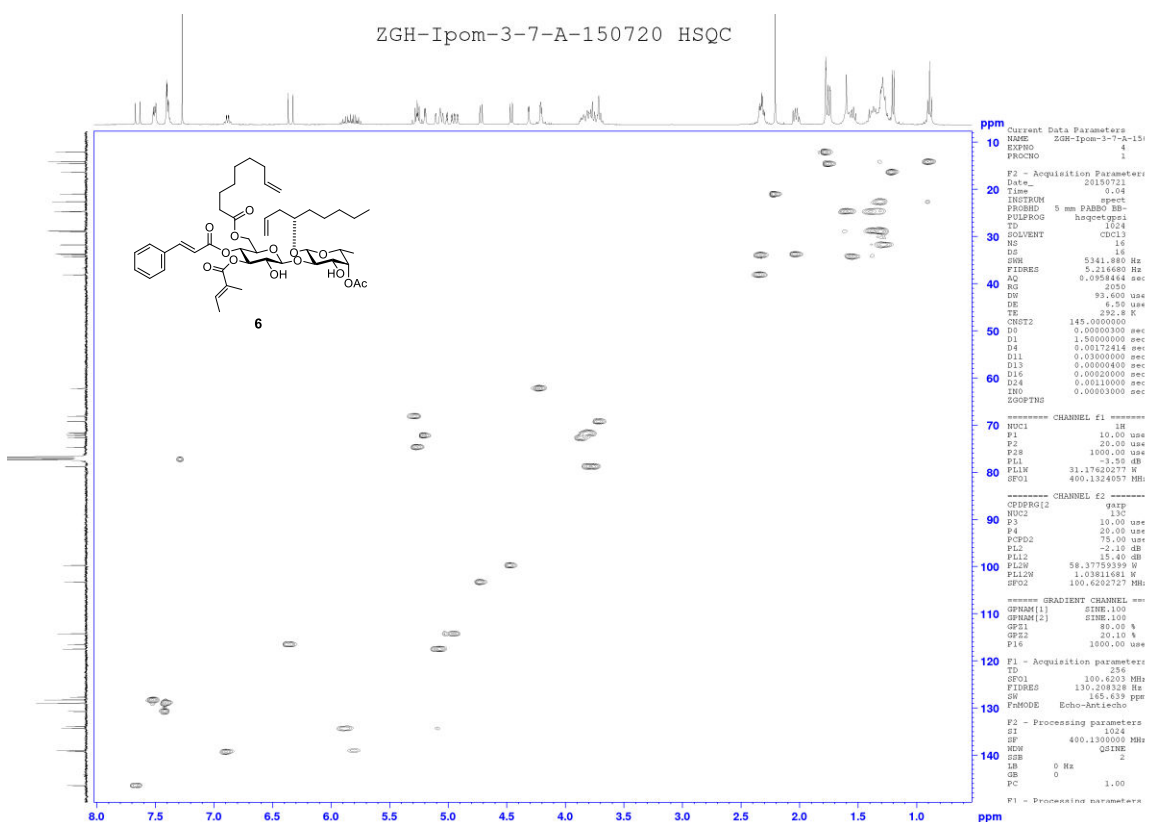

# HMBC NMR spectrum of **6** (CDCl<sub>3</sub>, 400 MHz)

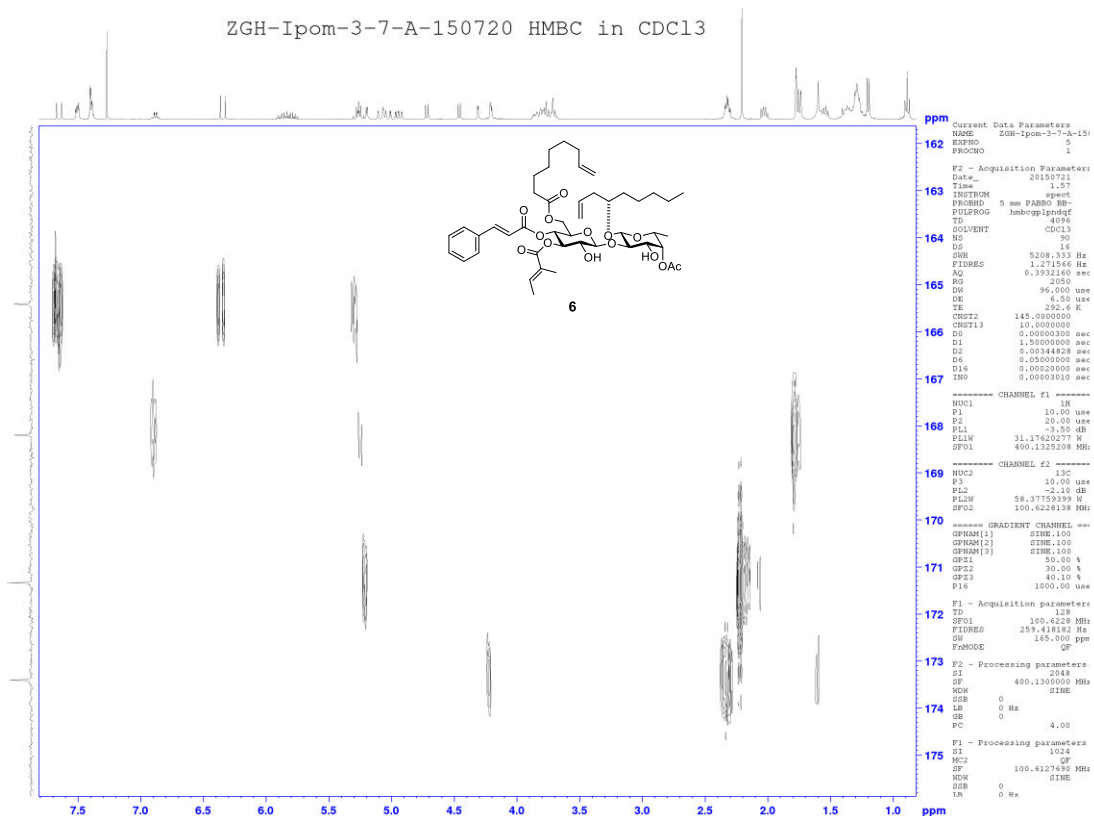

# <sup>1</sup>H NMR spectrum of **7** (CDCl<sub>3</sub>, 400 MHz)

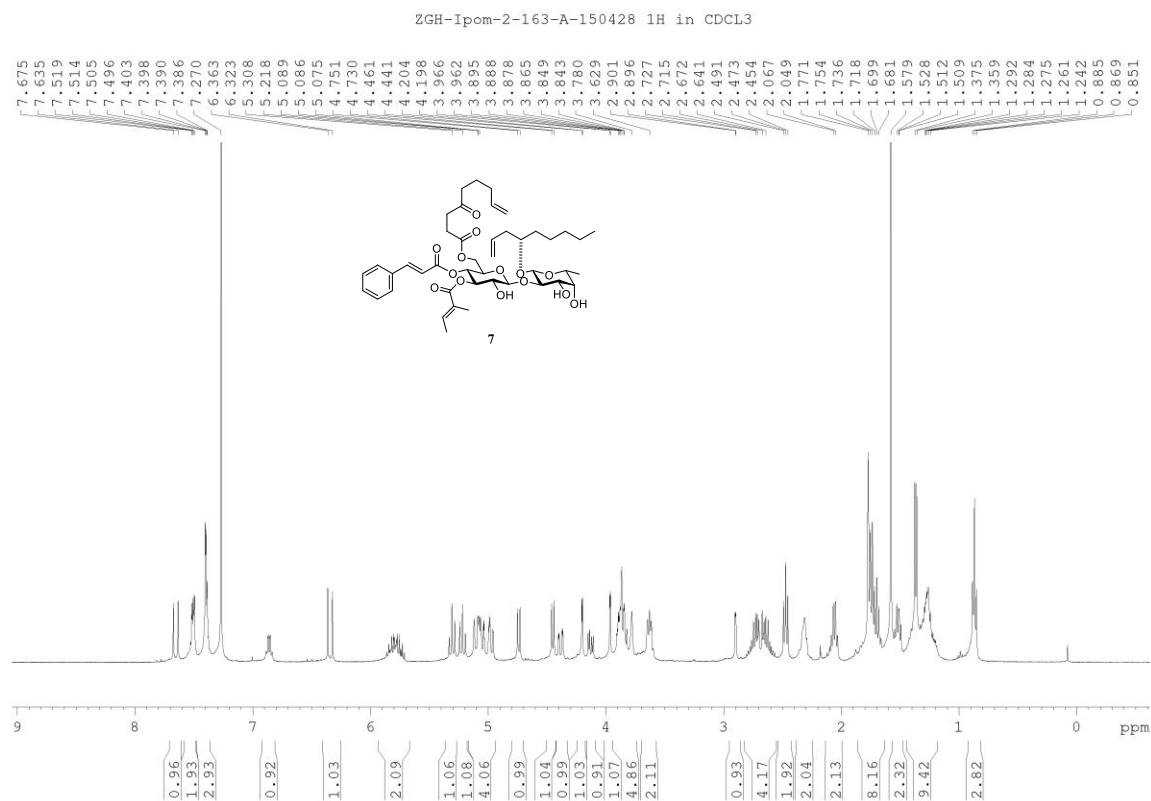

$^{13}\text{C}$  NMR spectrum of **7** ( $\text{CDCl}_3$ , 400 MHz)

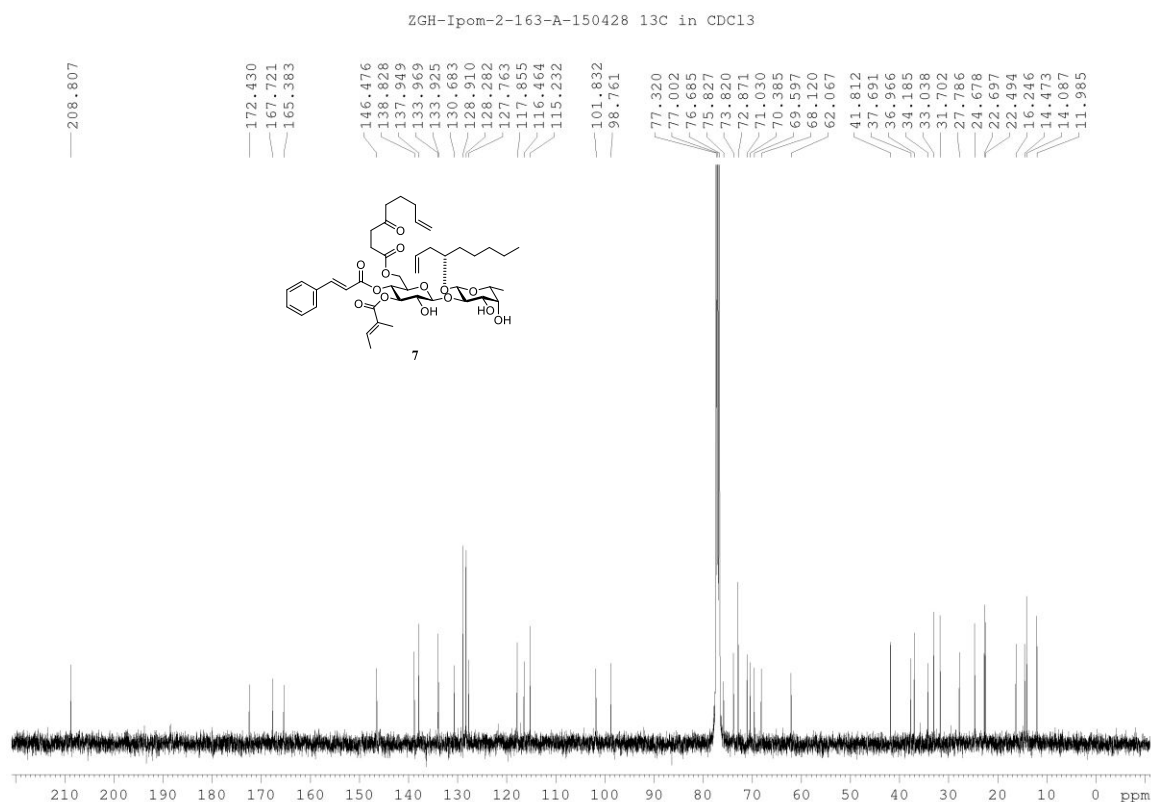

COSY NMR spectrum of **7** ( $\text{CDCl}_3$ , 400 MHz)

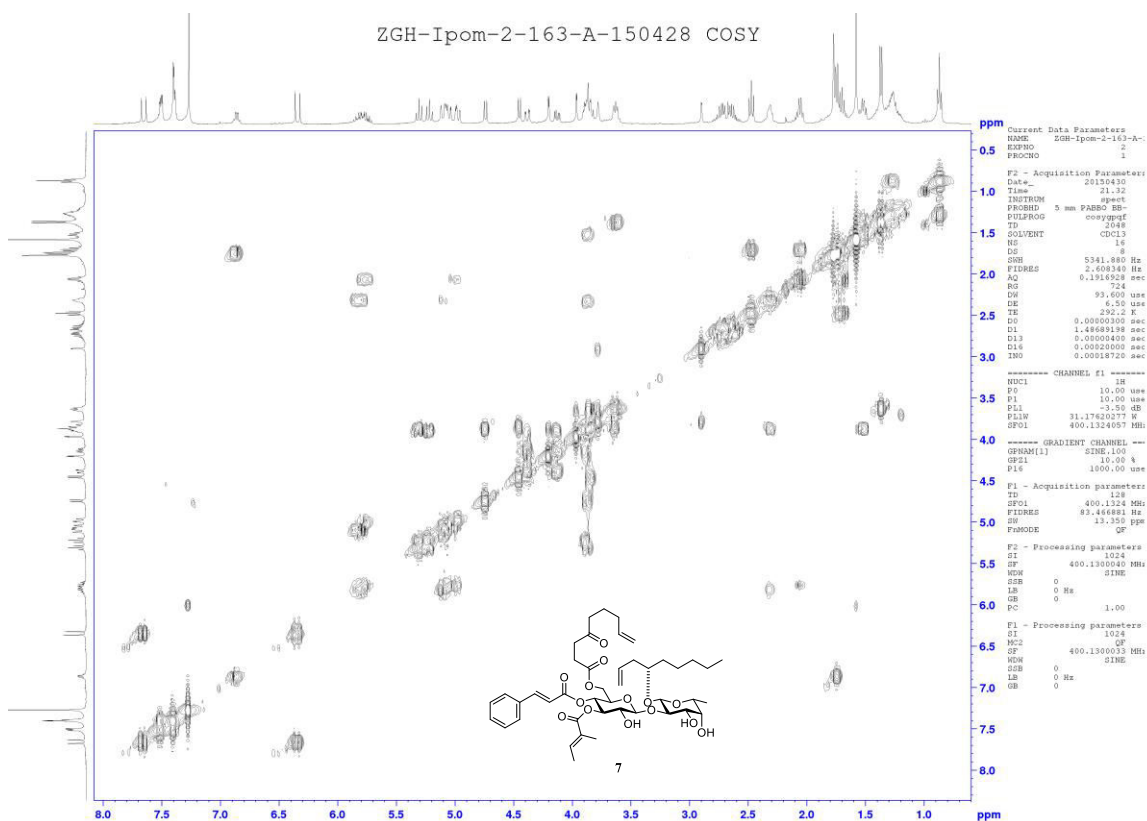

# HSQC NMR spectrum of **7** (CDCl<sub>3</sub>, 400 MHz)

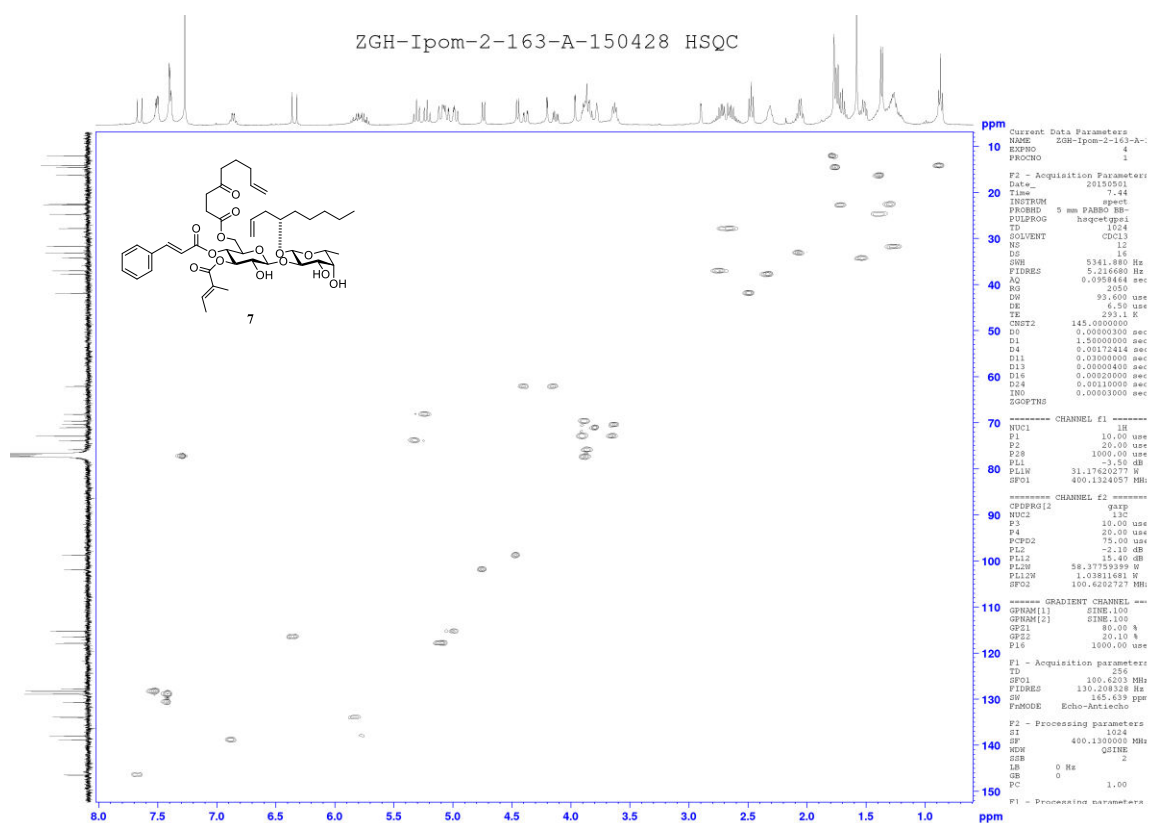

# <sup>1</sup>H NMR spectrum of **8** (CDCl<sub>3</sub>, 400 MHz)

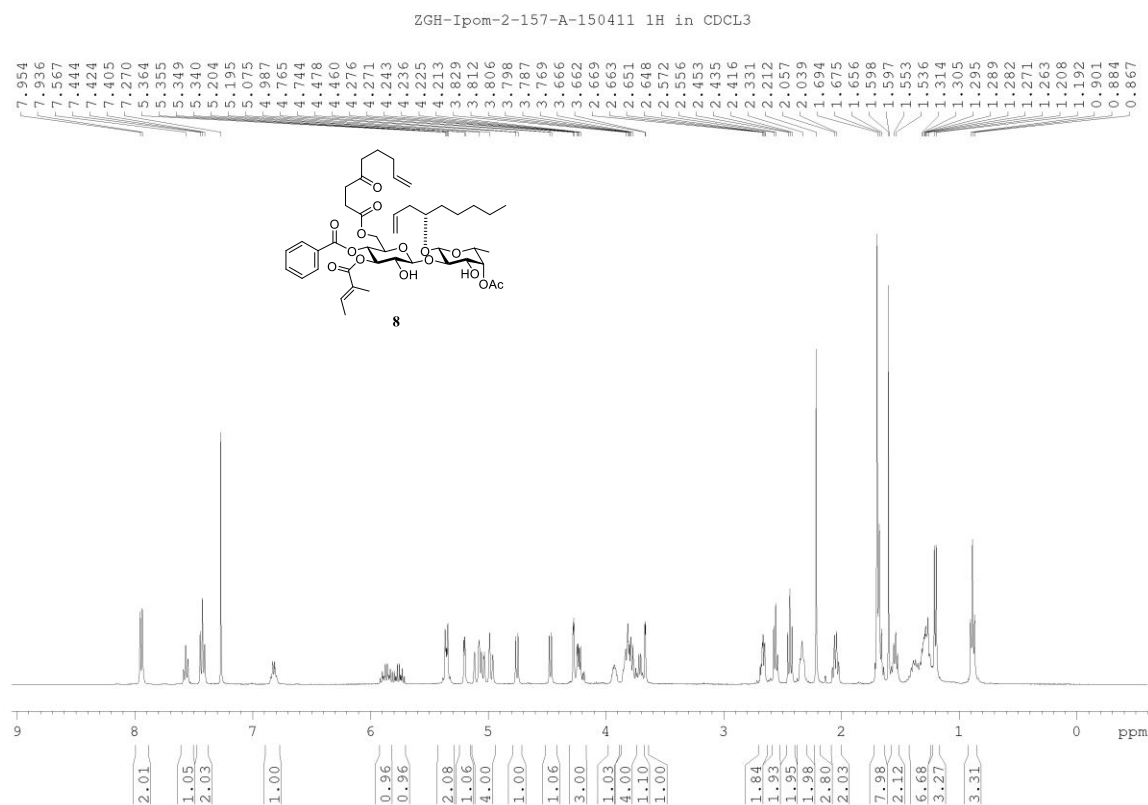

$^{13}\text{C}$  NMR spectrum of **8** ( $\text{CDCl}_3$ , 400 MHz)

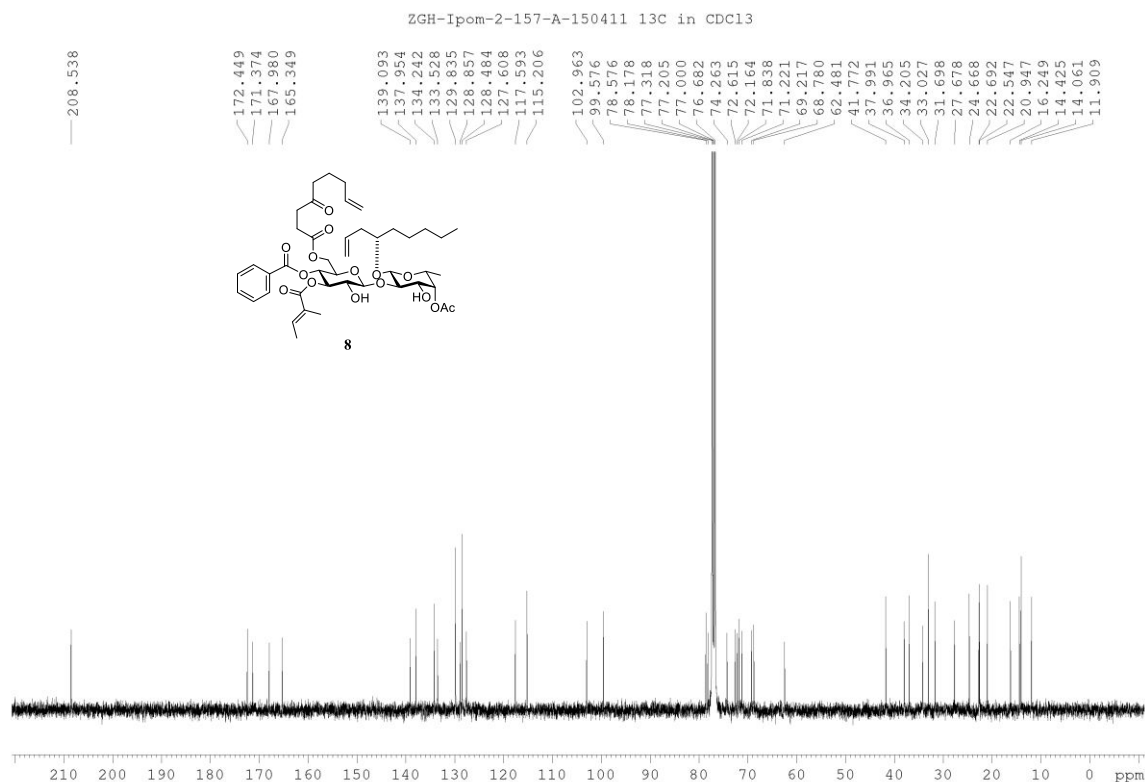

COSY NMR spectrum of **8** ( $\text{CDCl}_3$ , 400 MHz)

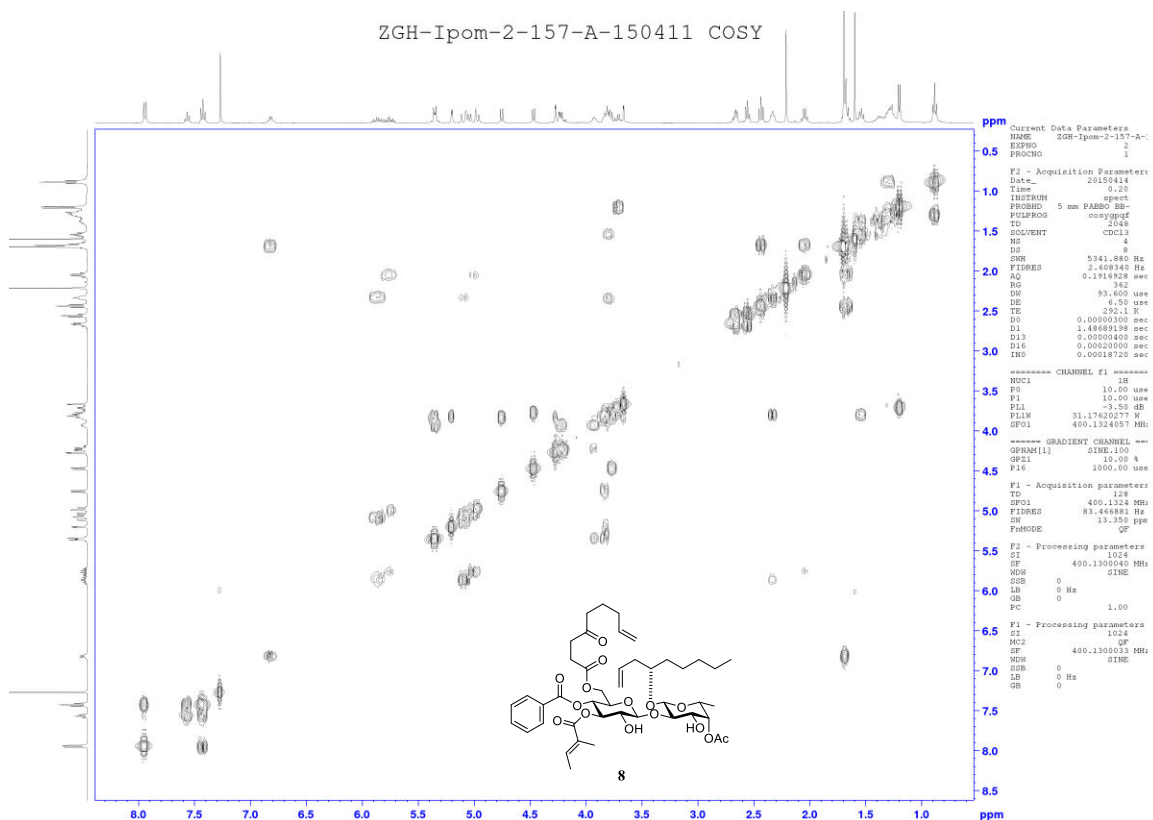

# HSQC NMR spectrum of **8** (CDCl<sub>3</sub>, 400 MHz)

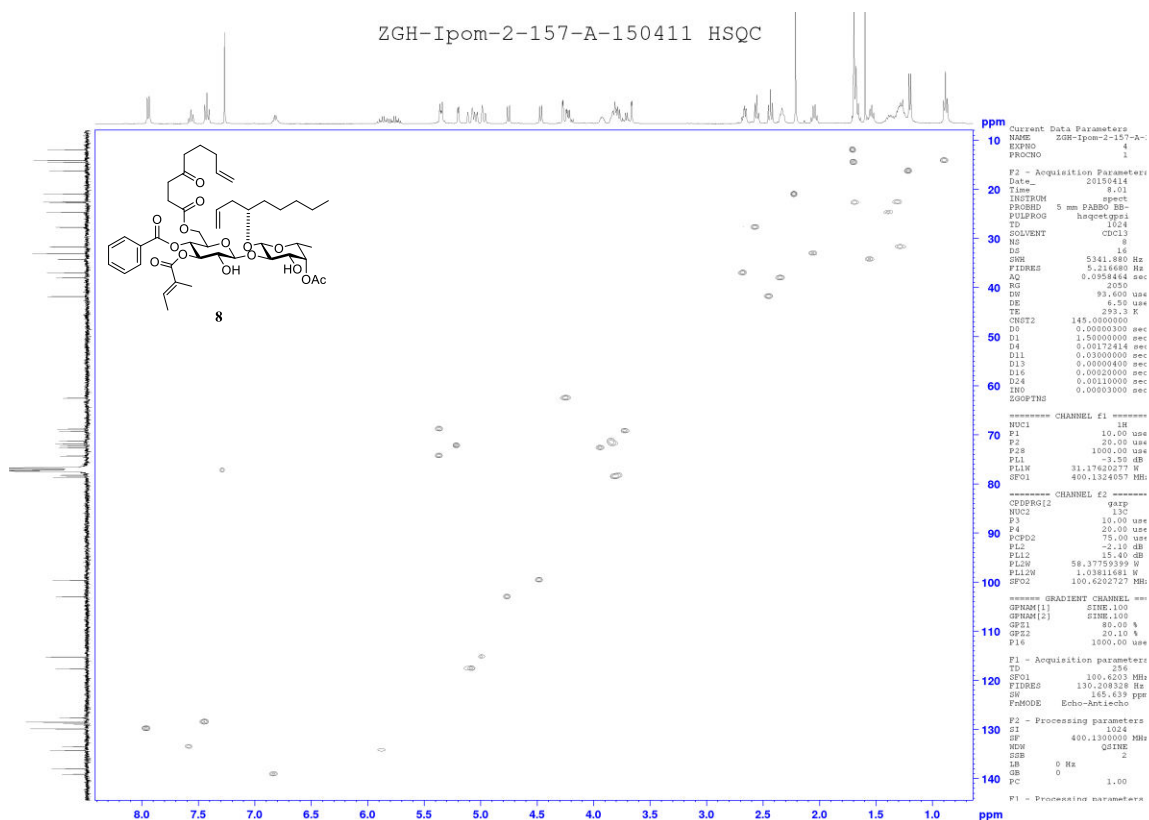

# HMBC NMR spectrum of **8** (ZIF-20) (CDCl<sub>3</sub>, 400 MHz)

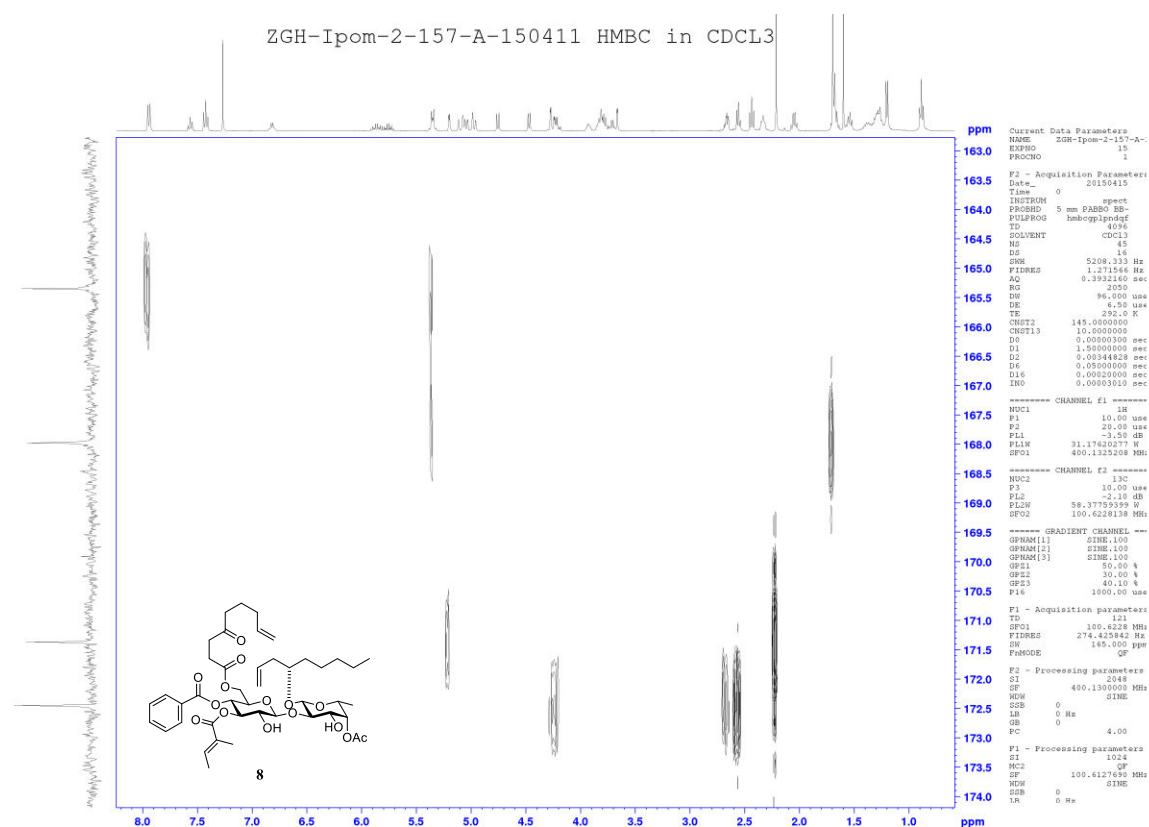

$^1\text{H}$  NMR spectrum of **9** ( $\text{CDCl}_3$ , 400 MHz)

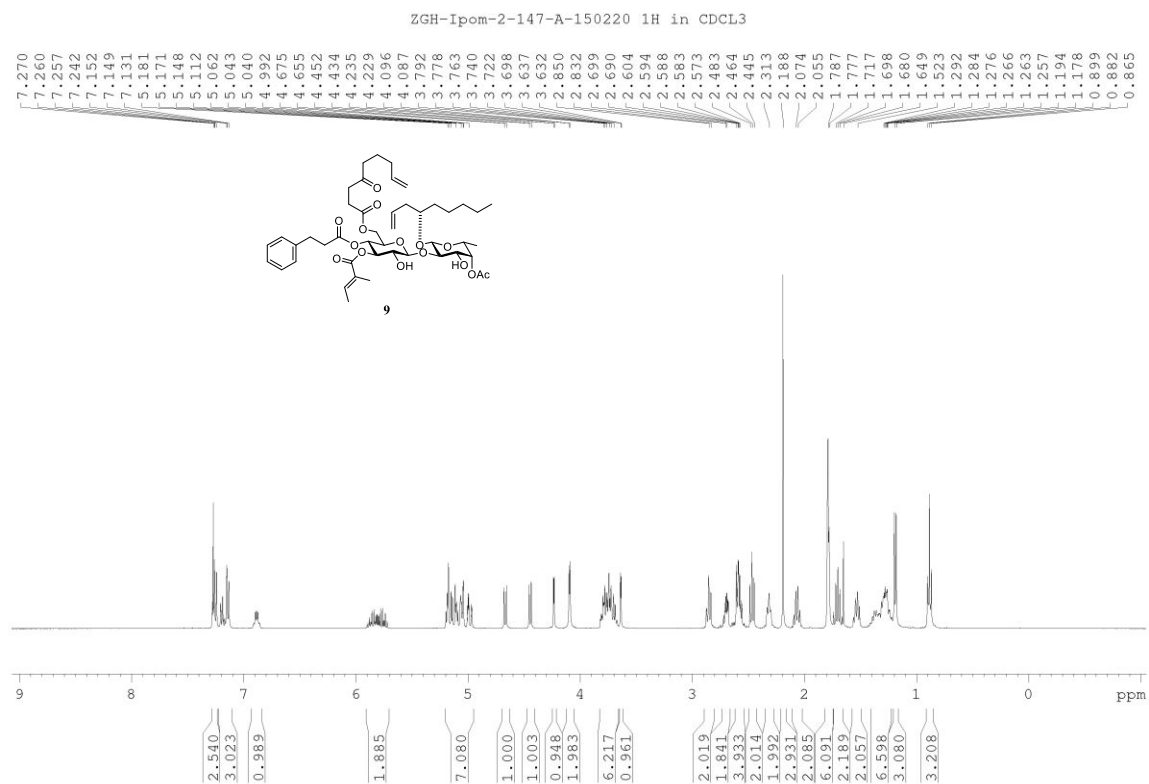

$^{13}\text{C}$  NMR spectrum of **9** ( $\text{CDCl}_3$ , 400 MHz)

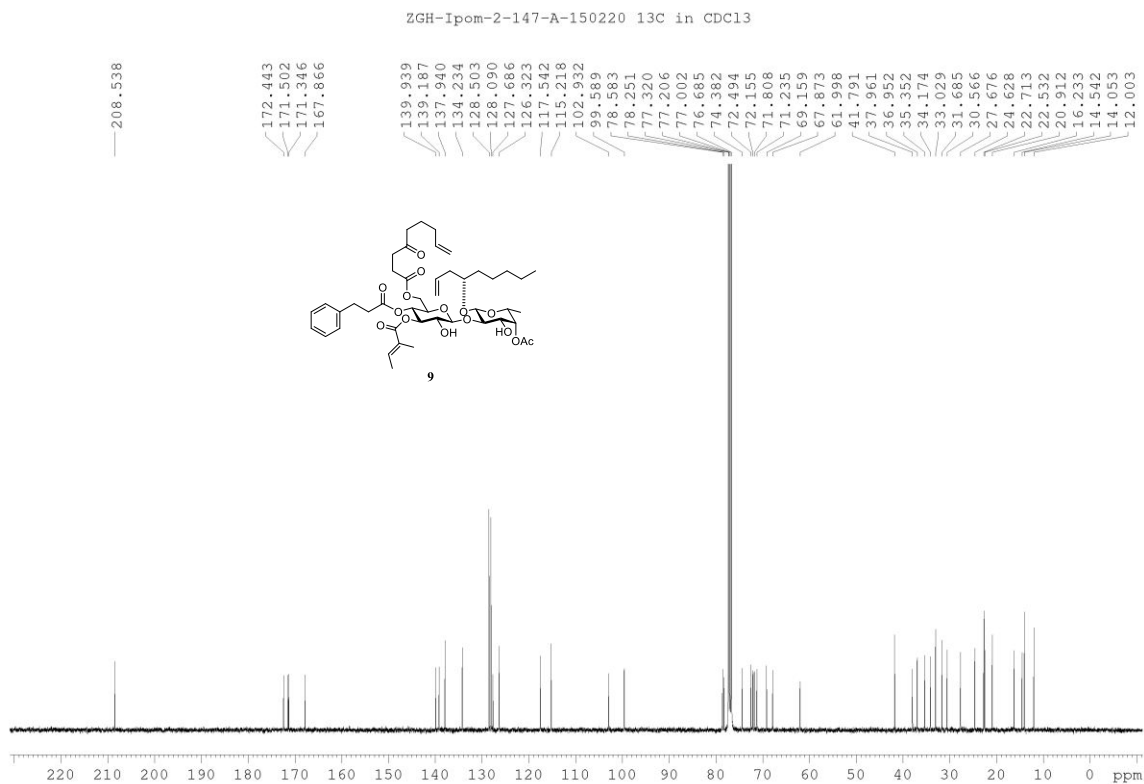



# COSY NMR spectrum of **9** (CDCl<sub>3</sub>, 400 MHz)

ZGH-Ipom-2-147-A-150220 COSY

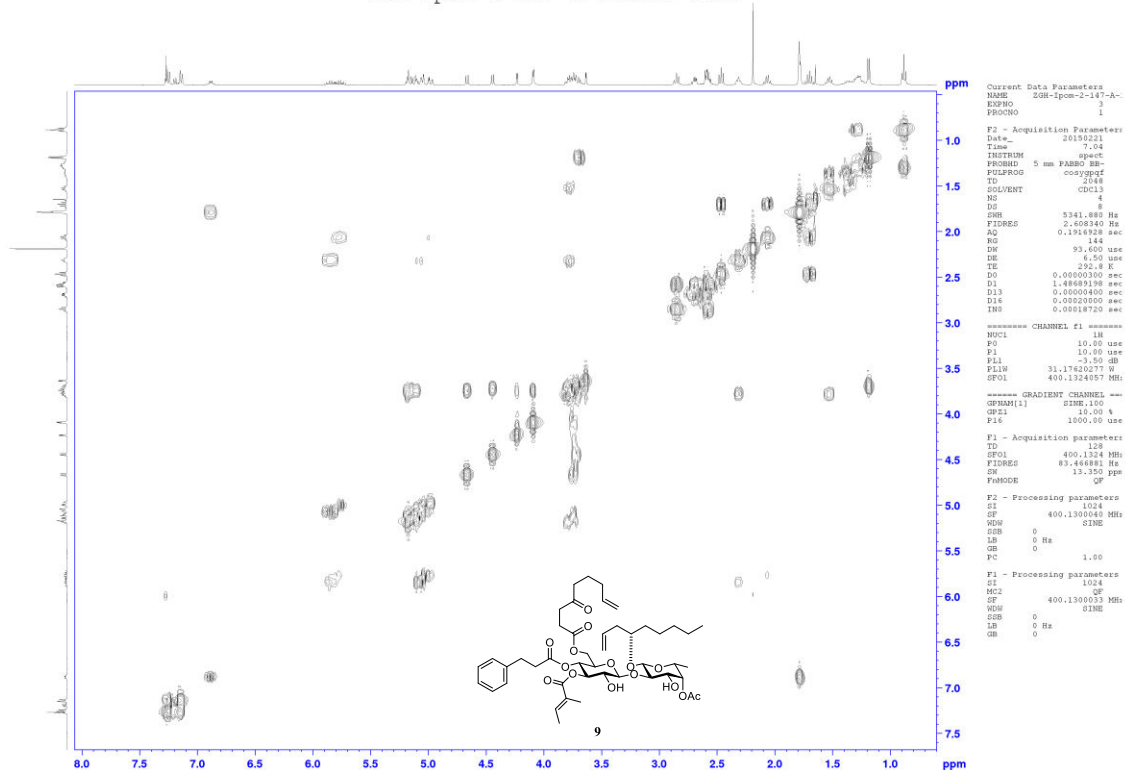

# HSQC NMR spectrum of **9** (CDCl<sub>3</sub>, 400 MHz)

ZGH-Ipom-2-147-A-150220 HSQC

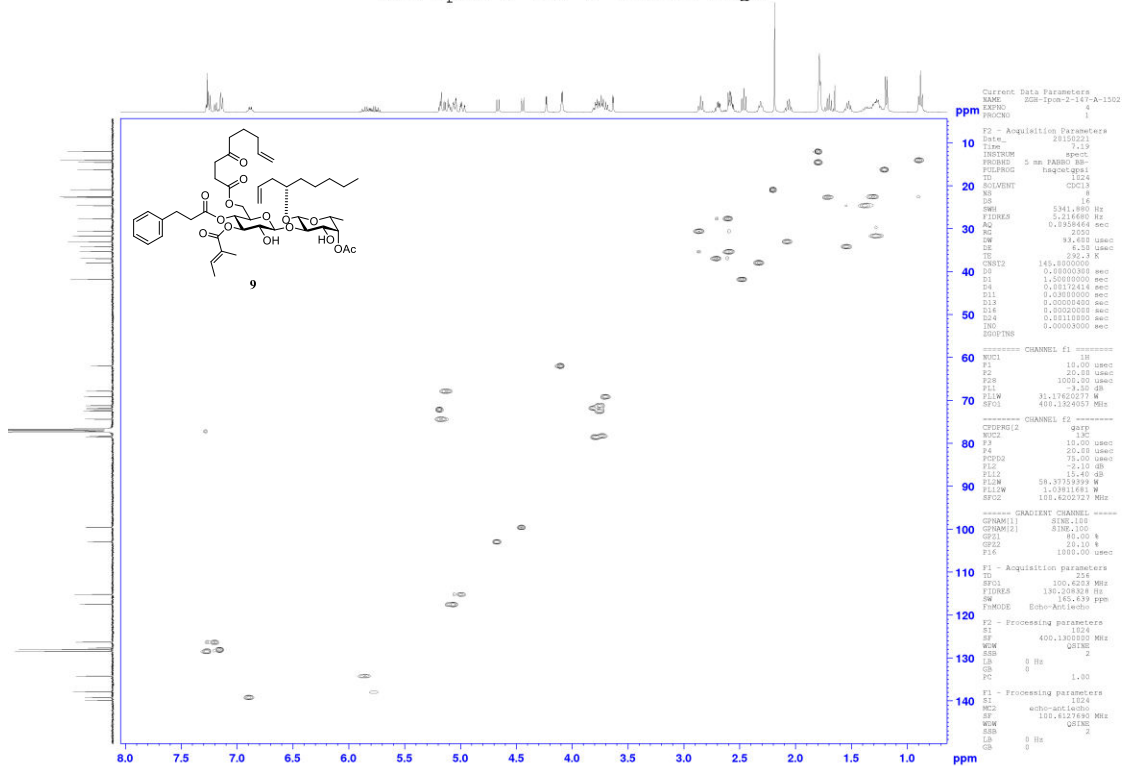

# HMBC NMR spectrum of **9** (CDCl<sub>3</sub>, 400 MHz)

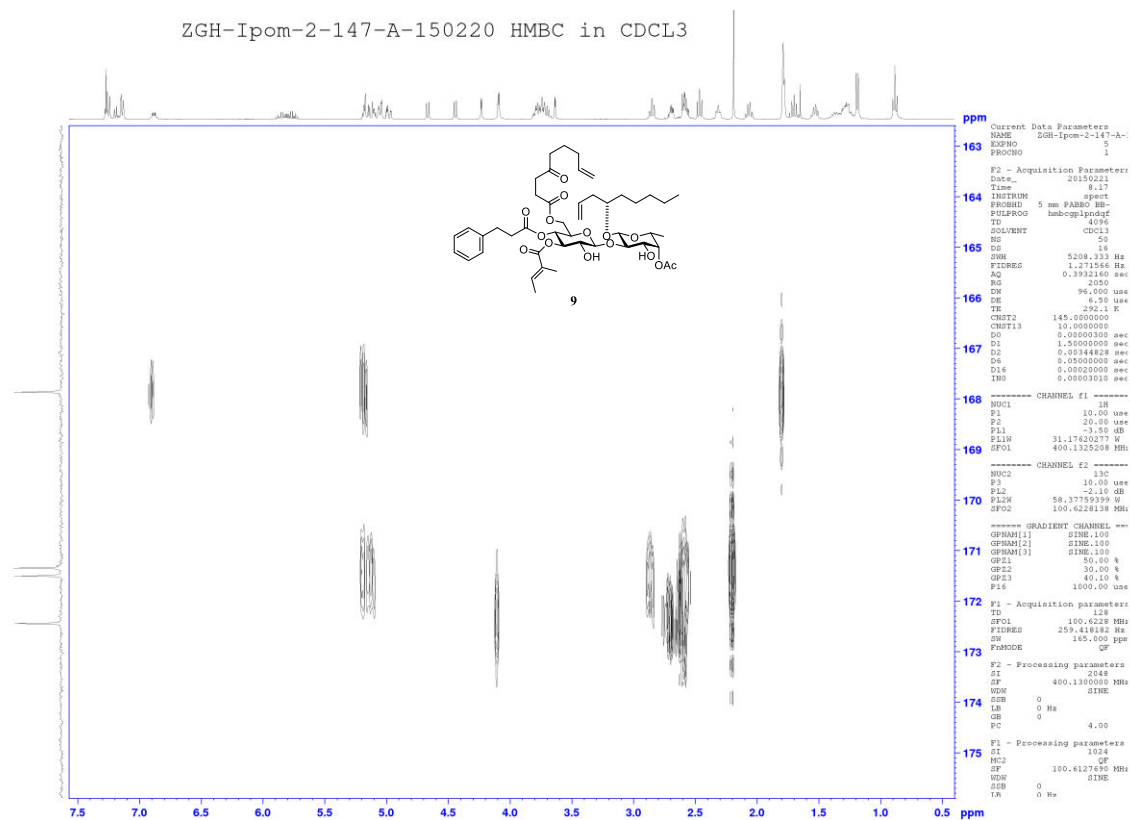

# <sup>1</sup>H NMR spectrum of **10** (CDCl<sub>3</sub>, 400 MHz)

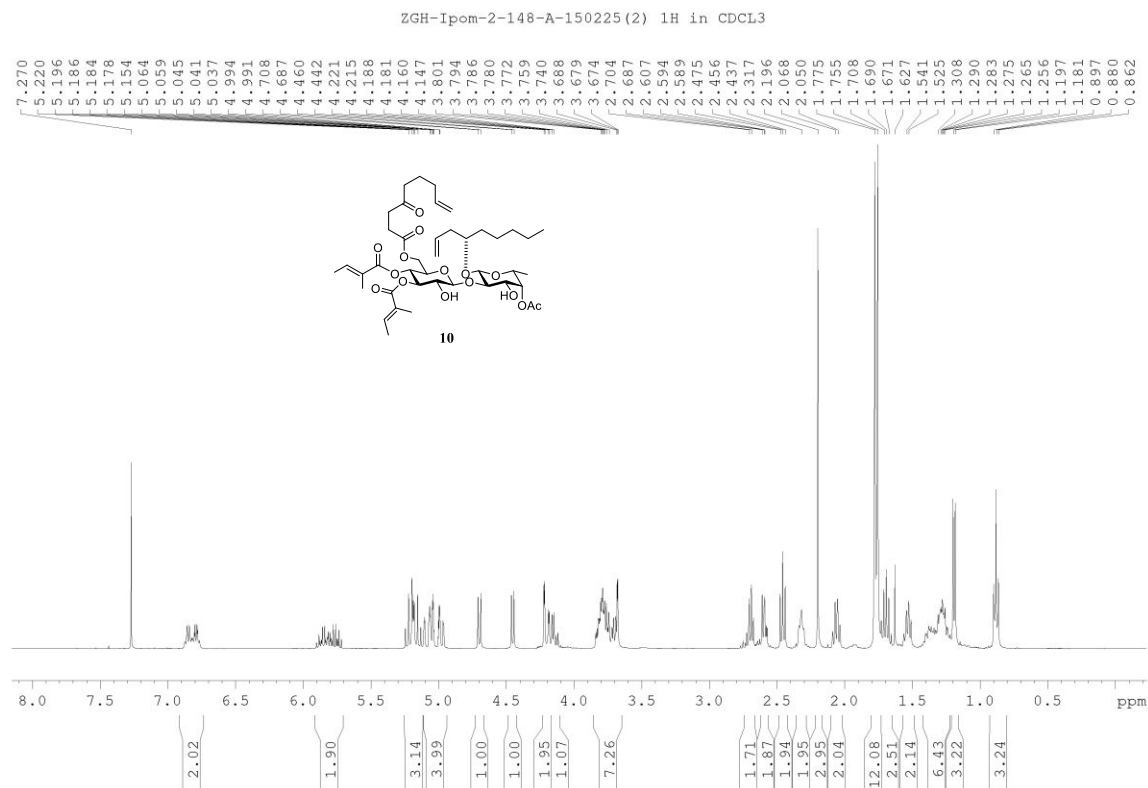

$^{13}\text{C}$  NMR spectrum of **10** ( $\text{CDCl}_3$ , 400 MHz)

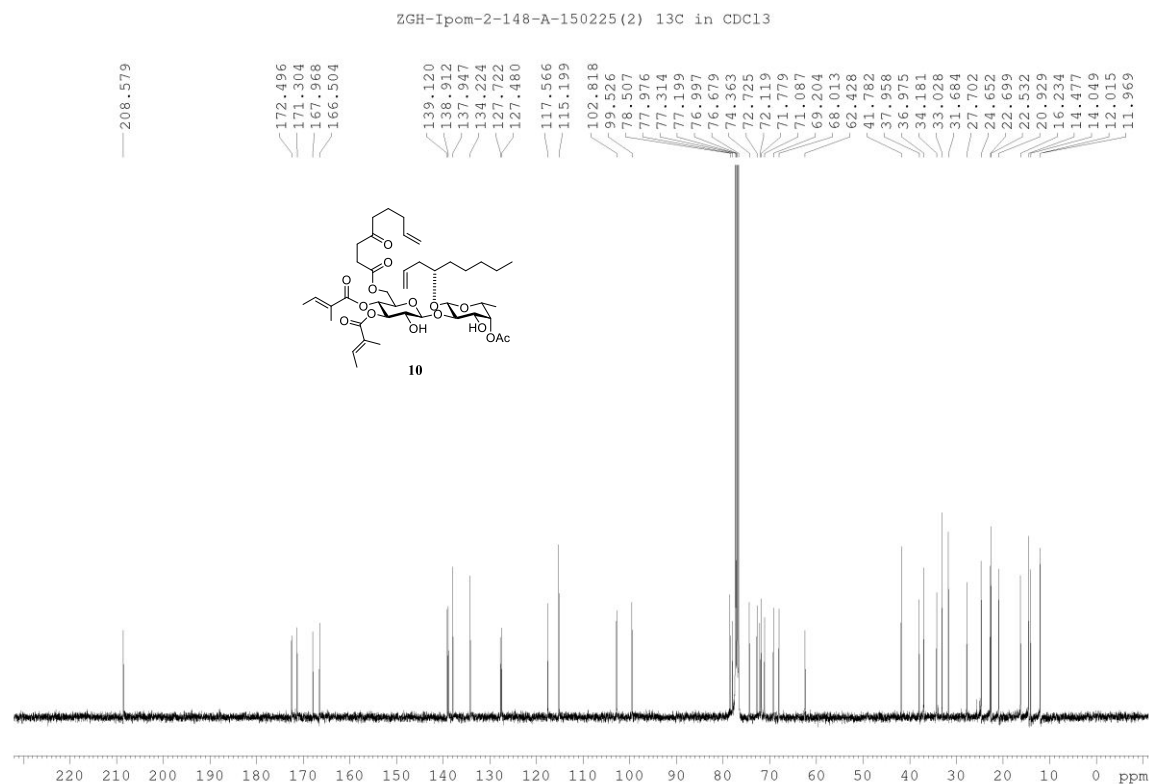

COSY NMR spectrum of **10** ( $\text{CDCl}_3$ , 400 MHz)

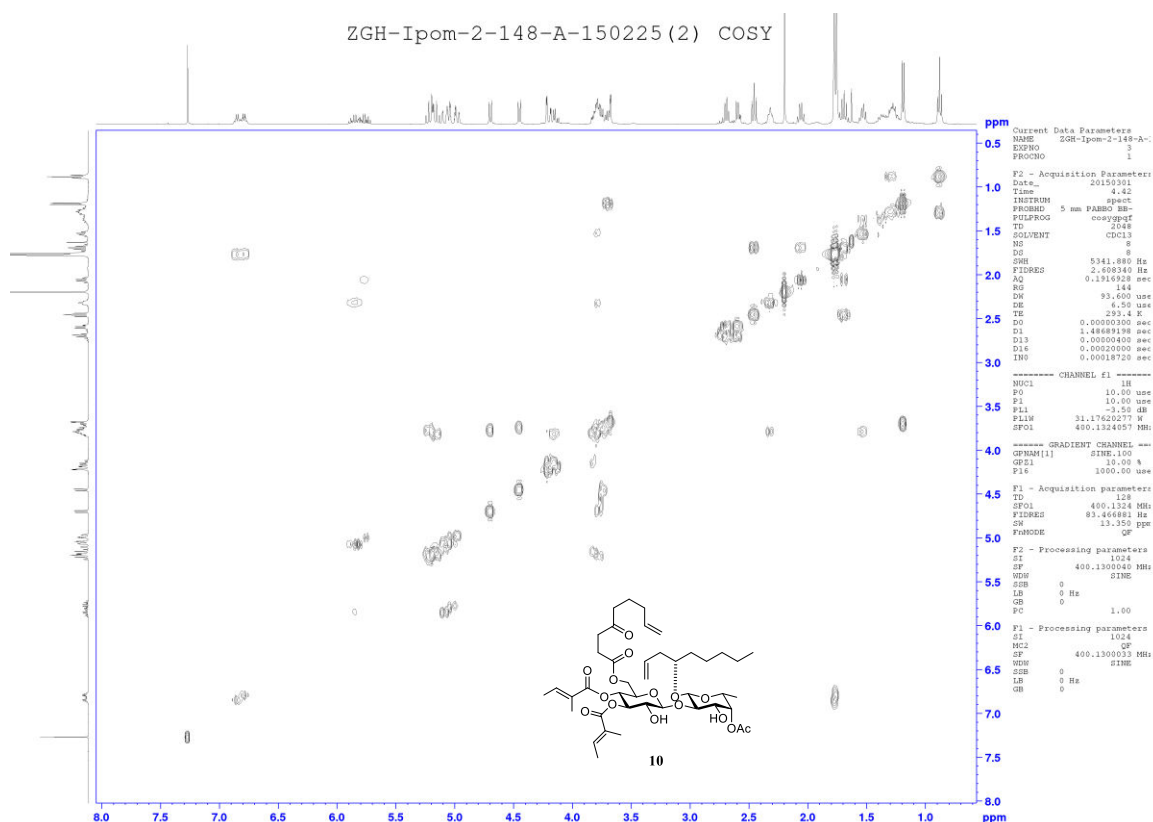

# HSQC NMR spectrum of **10** (CDCl<sub>3</sub>, 400 MHz)

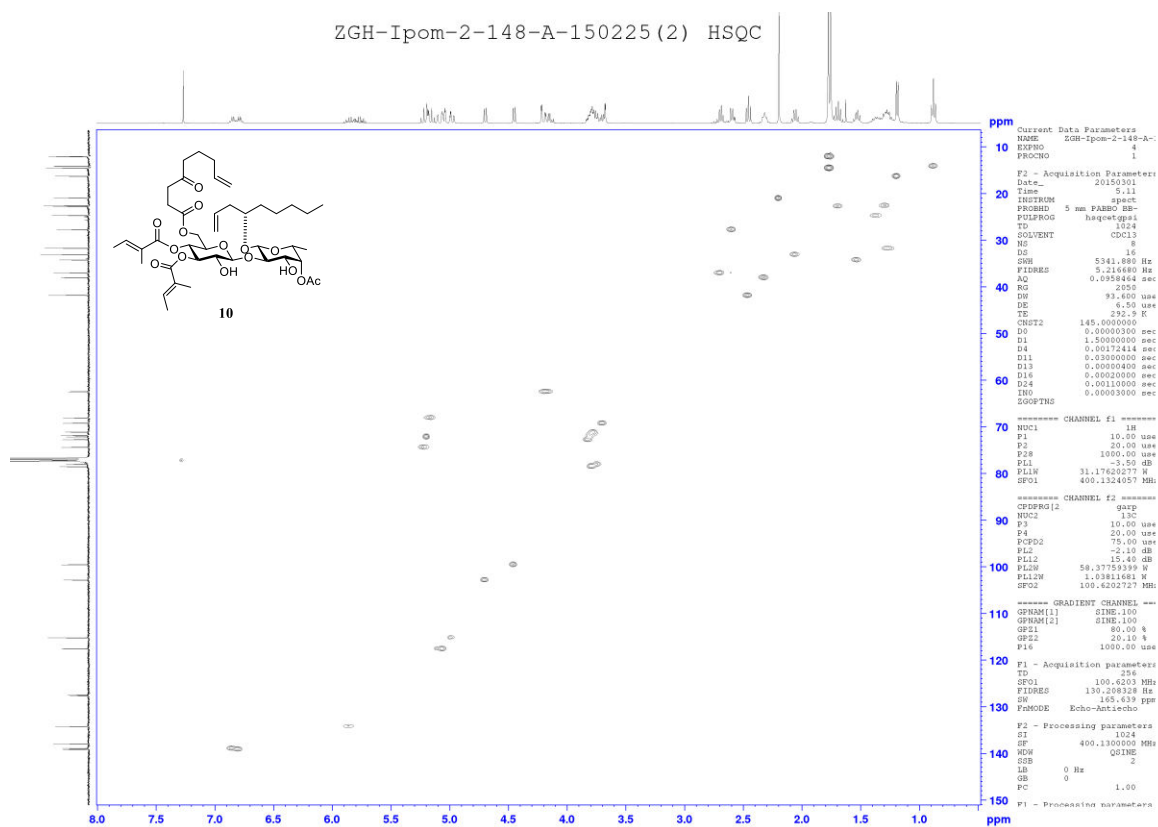

# HMBC NMR spectrum of **10** (CDCl<sub>3</sub>, 400 MHz)

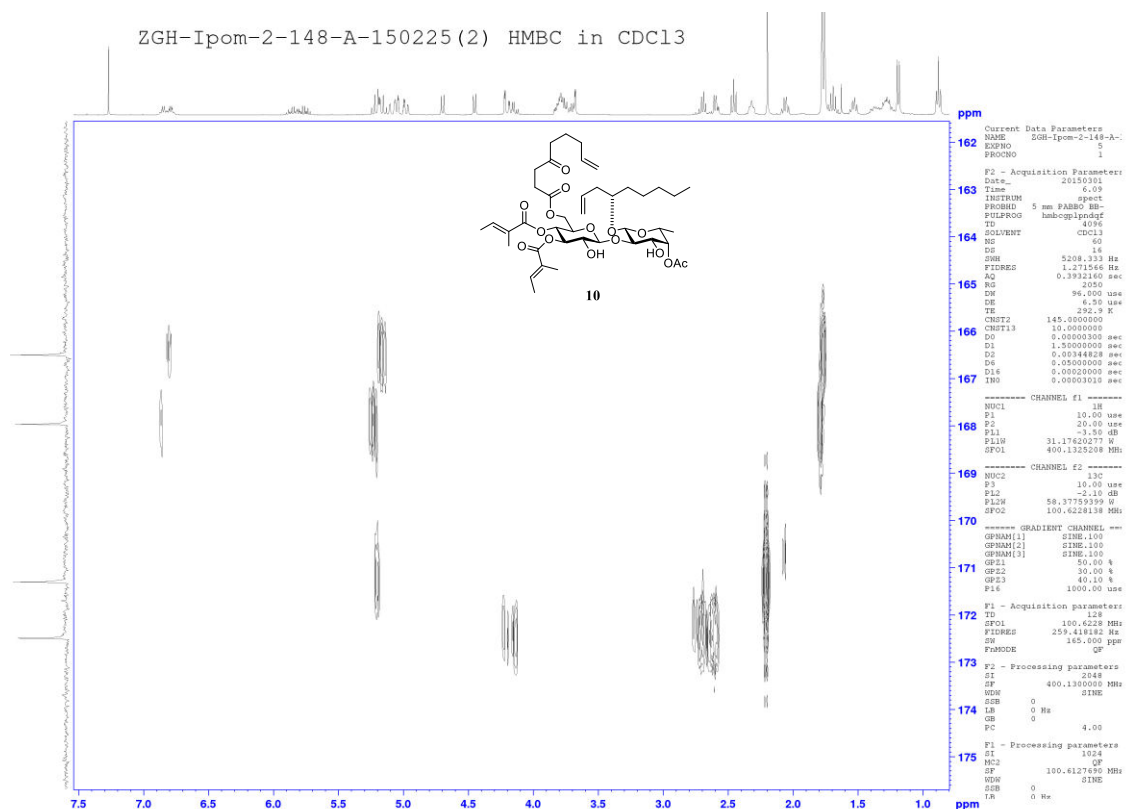

$^1\text{H}$  NMR spectrum of **11** ( $\text{CDCl}_3$ , 400 MHz)

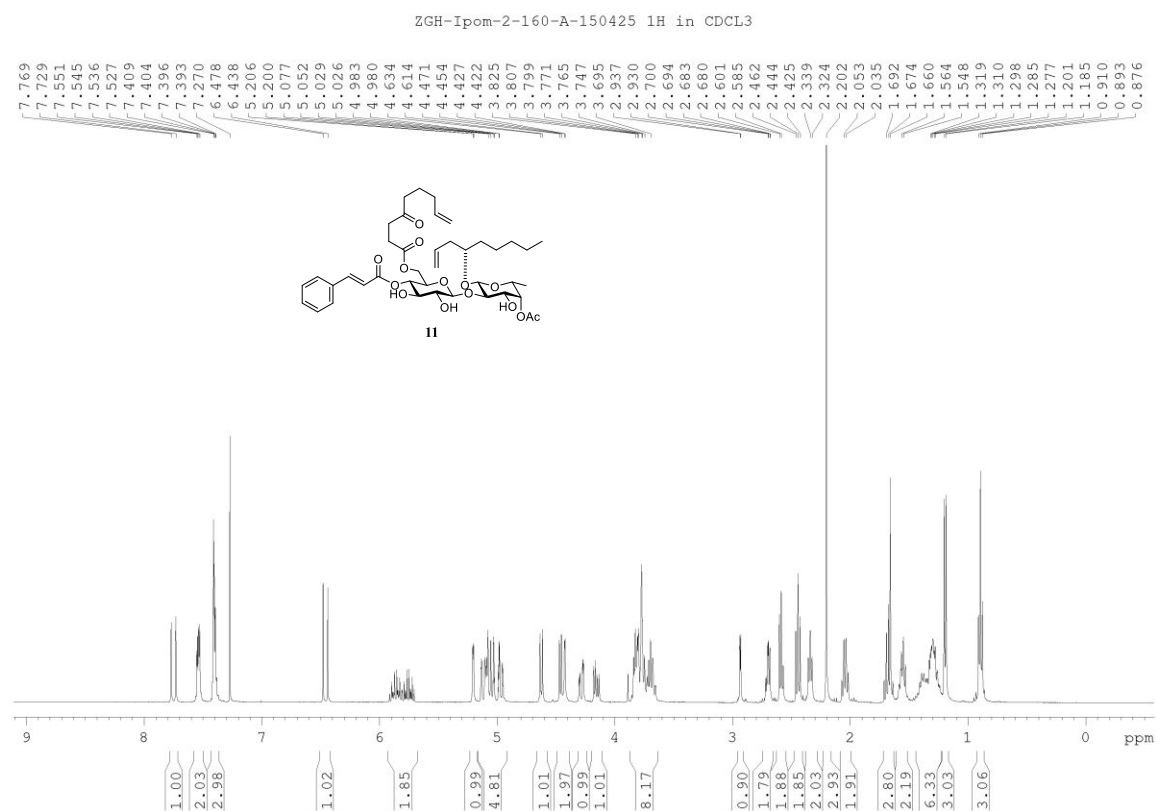

$^{13}\text{C}$  NMR spectrum of **11** ( $\text{CDCl}_3$ , 400 MHz)

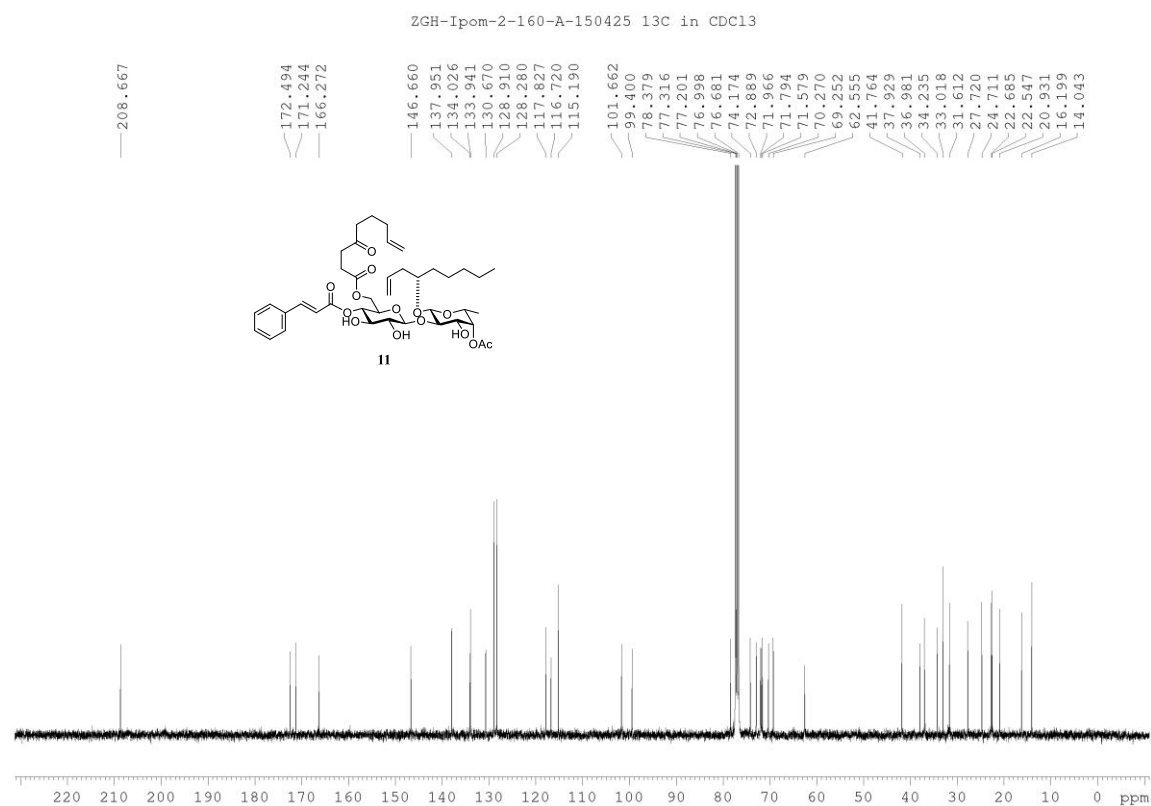

# COSY NMR spectrum of **11** (CDCl<sub>3</sub>, 400 MHz)

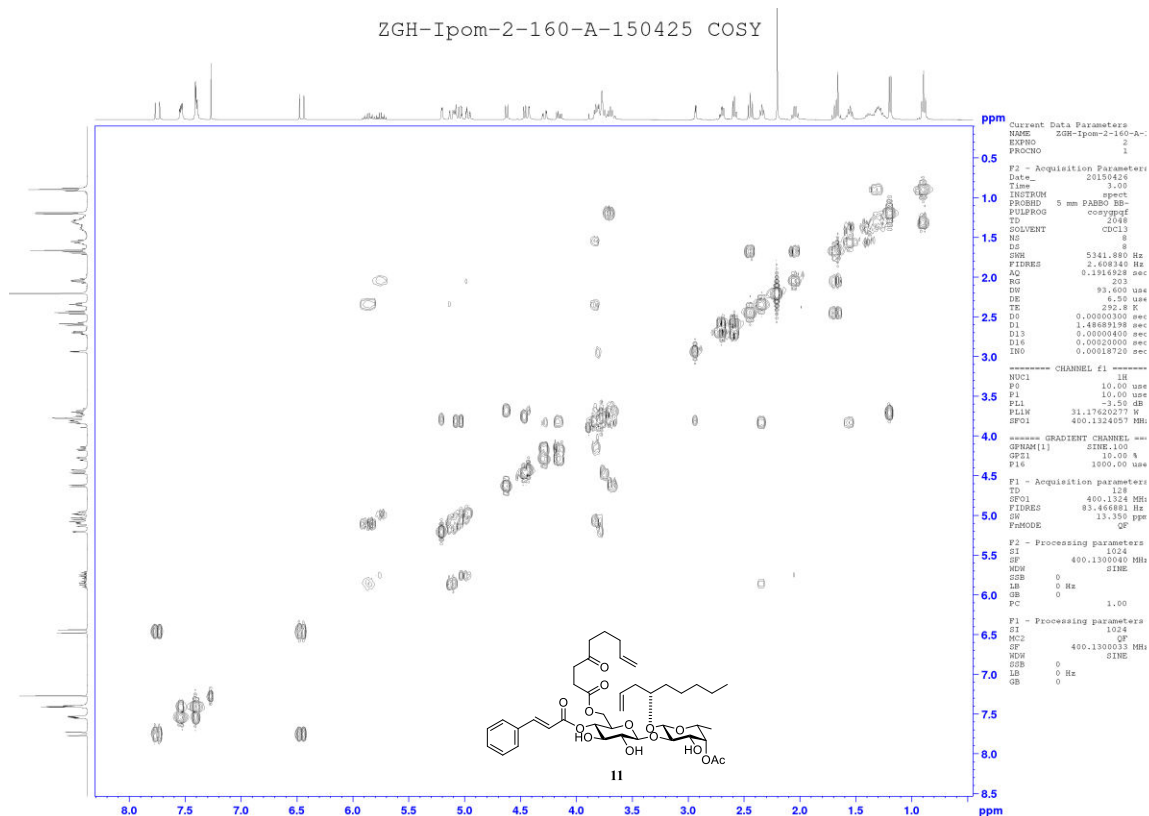

# HSQC NMR spectrum of **11** (CDCl<sub>3</sub>, 400 MHz)

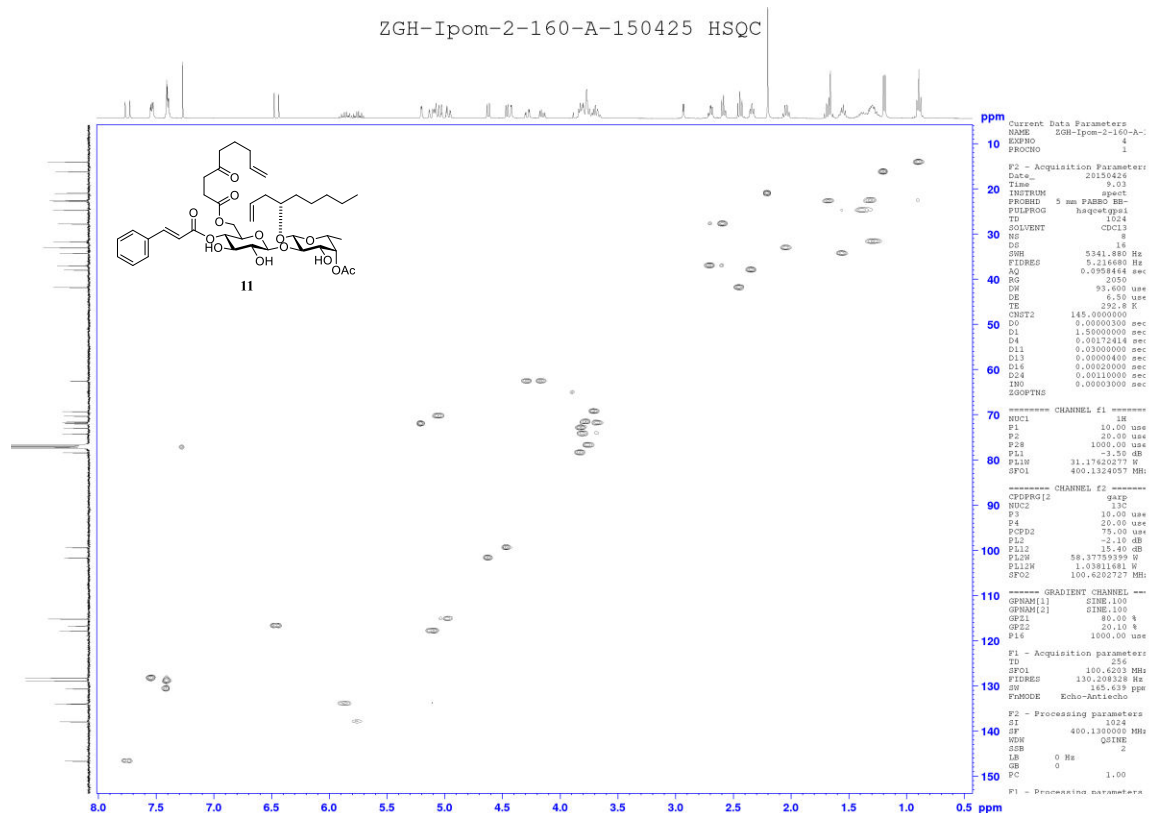

# HMBC NMR spectrum of **11** (CDCl<sub>3</sub>, 400 MHz)

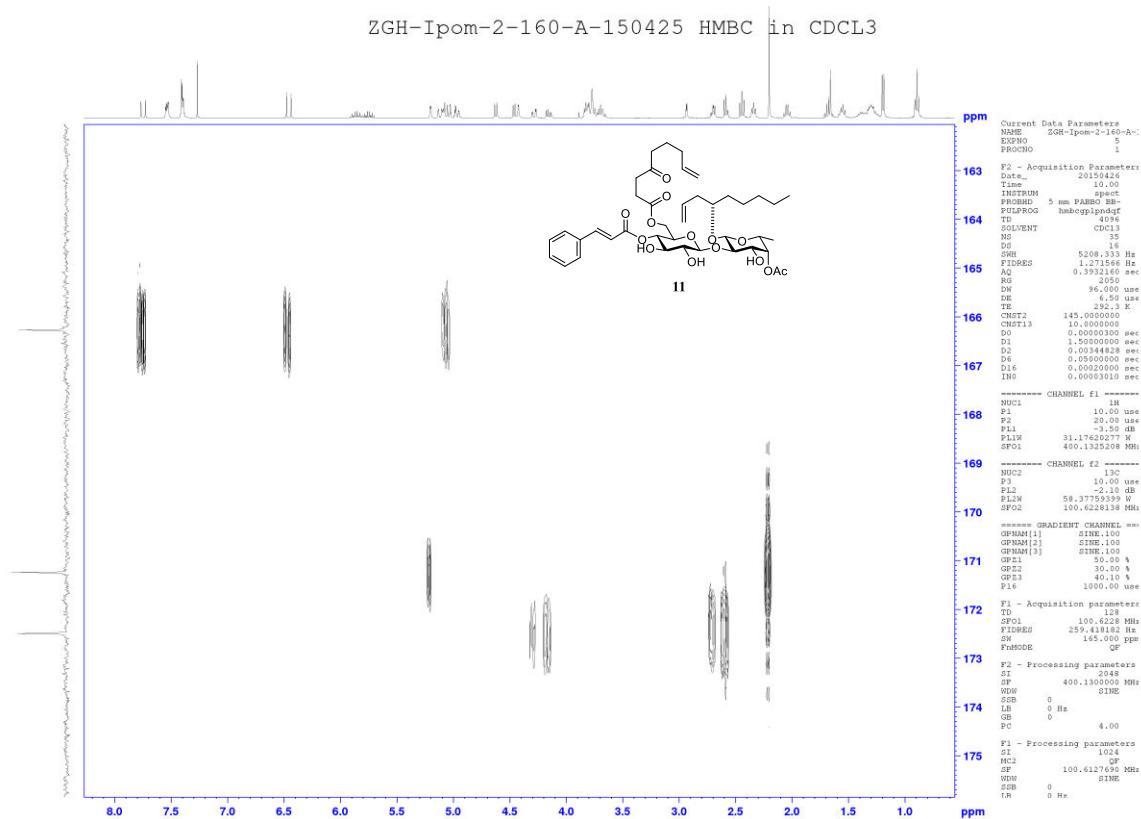

# <sup>1</sup>H NMR spectrum of **12** (CDCl<sub>3</sub>, 400 MHz)

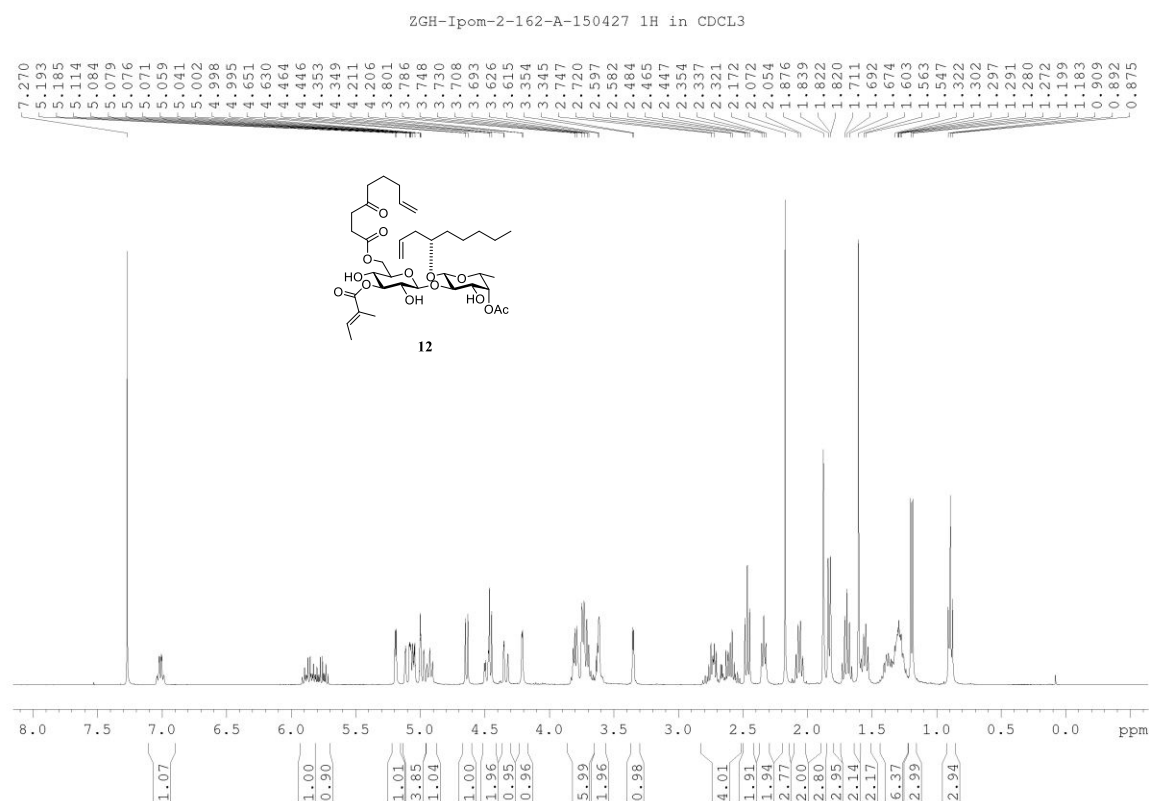

$^{13}\text{C}$  NMR spectrum of **12** ( $\text{CDCl}_3$ , 400 MHz)

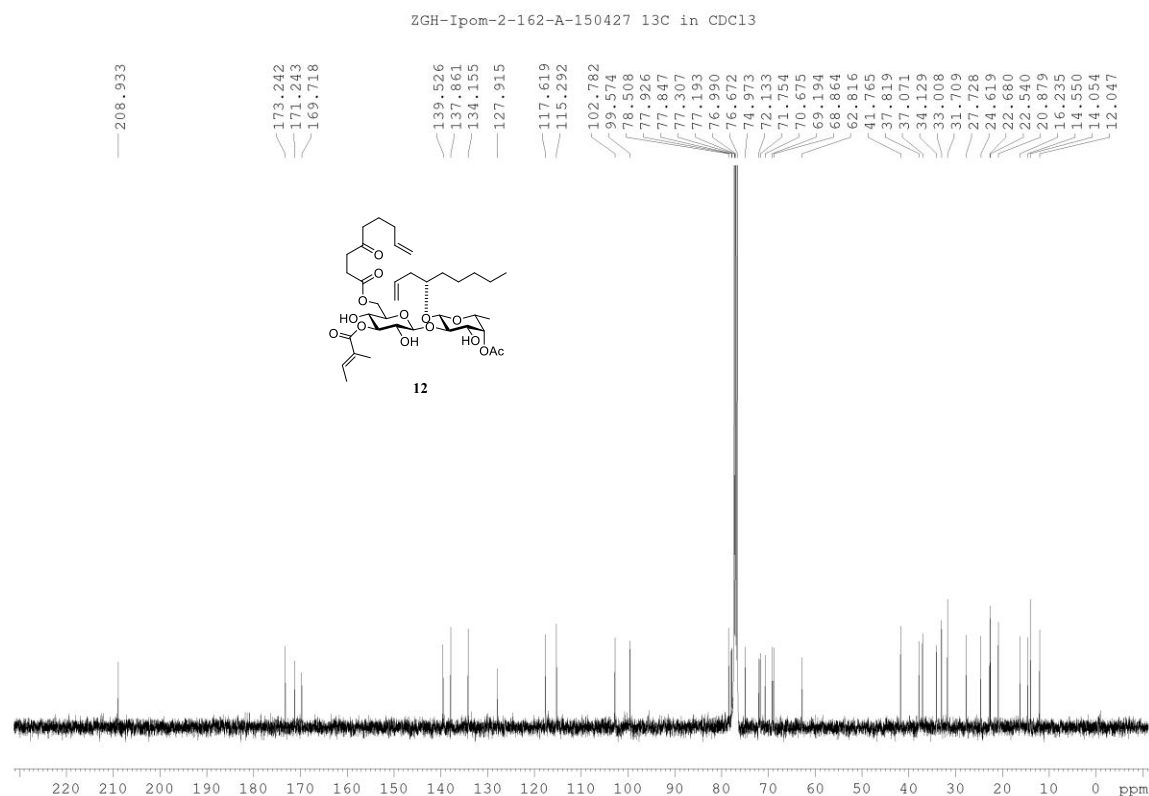

COSY NMR spectrum of **12** ( $\text{CDCl}_3$ , 400 MHz)

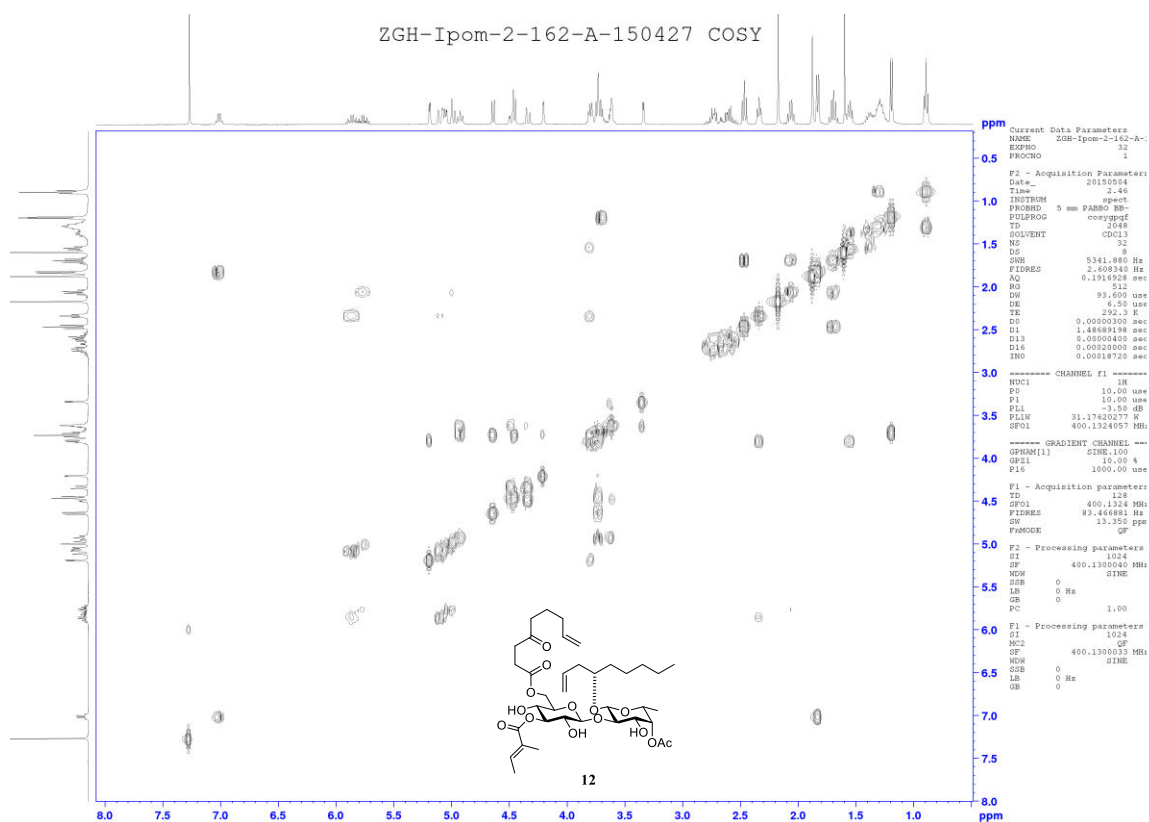



HSQC NMR spectrum of **12** (CDCl<sub>3</sub>, 400 MHz)

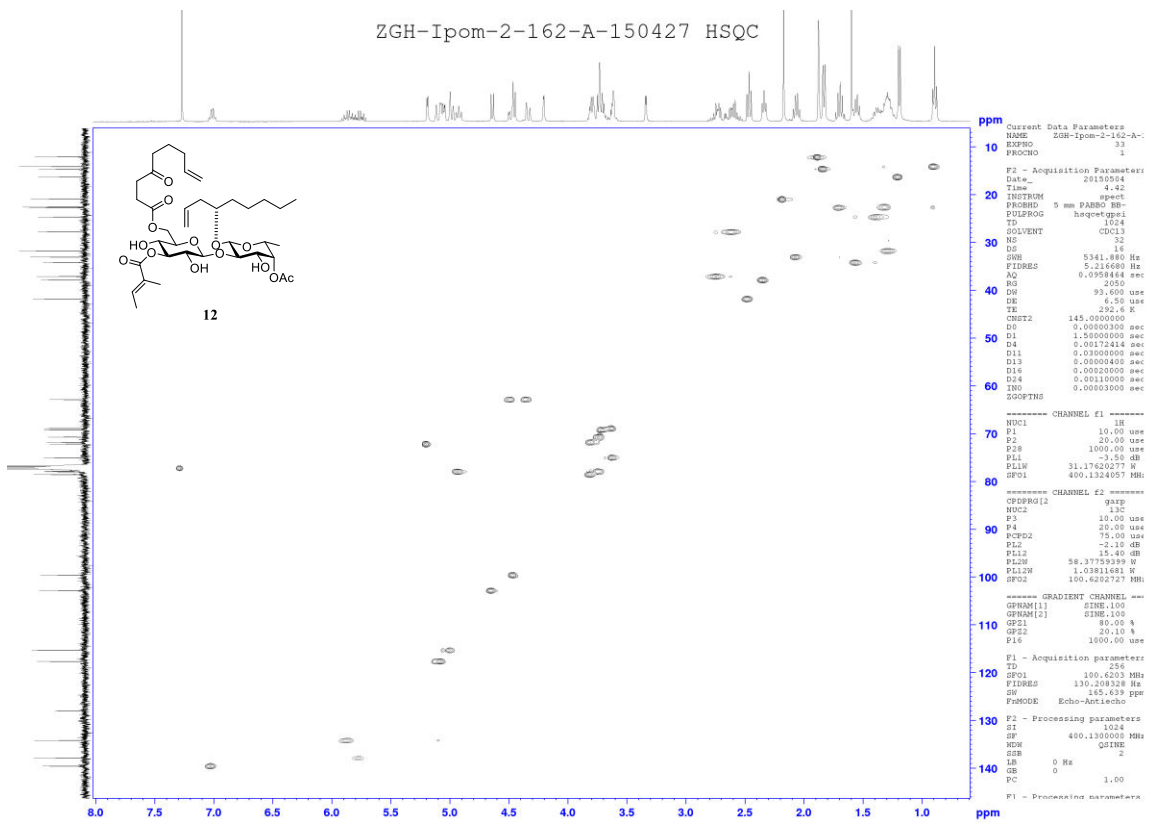

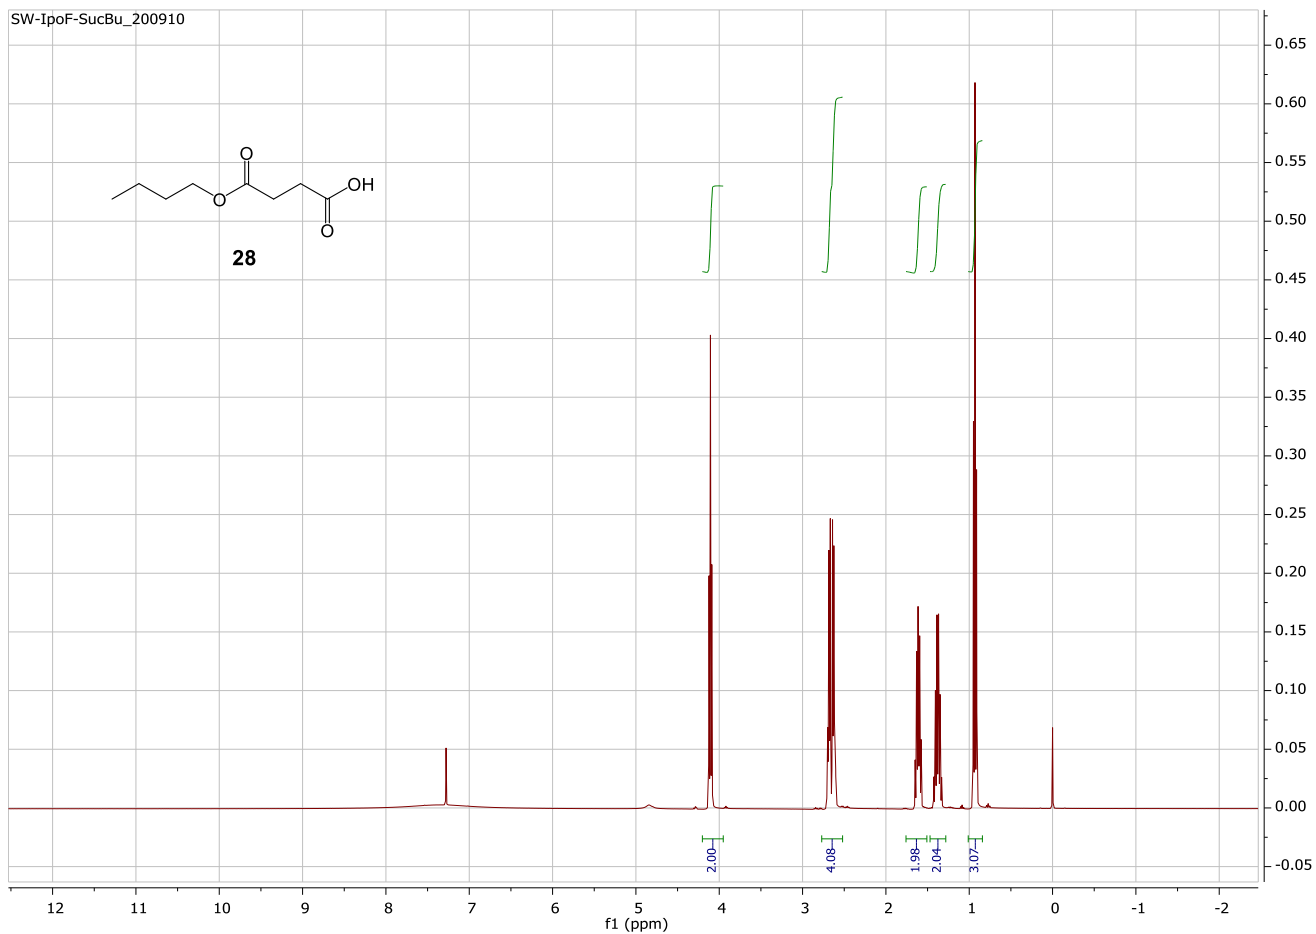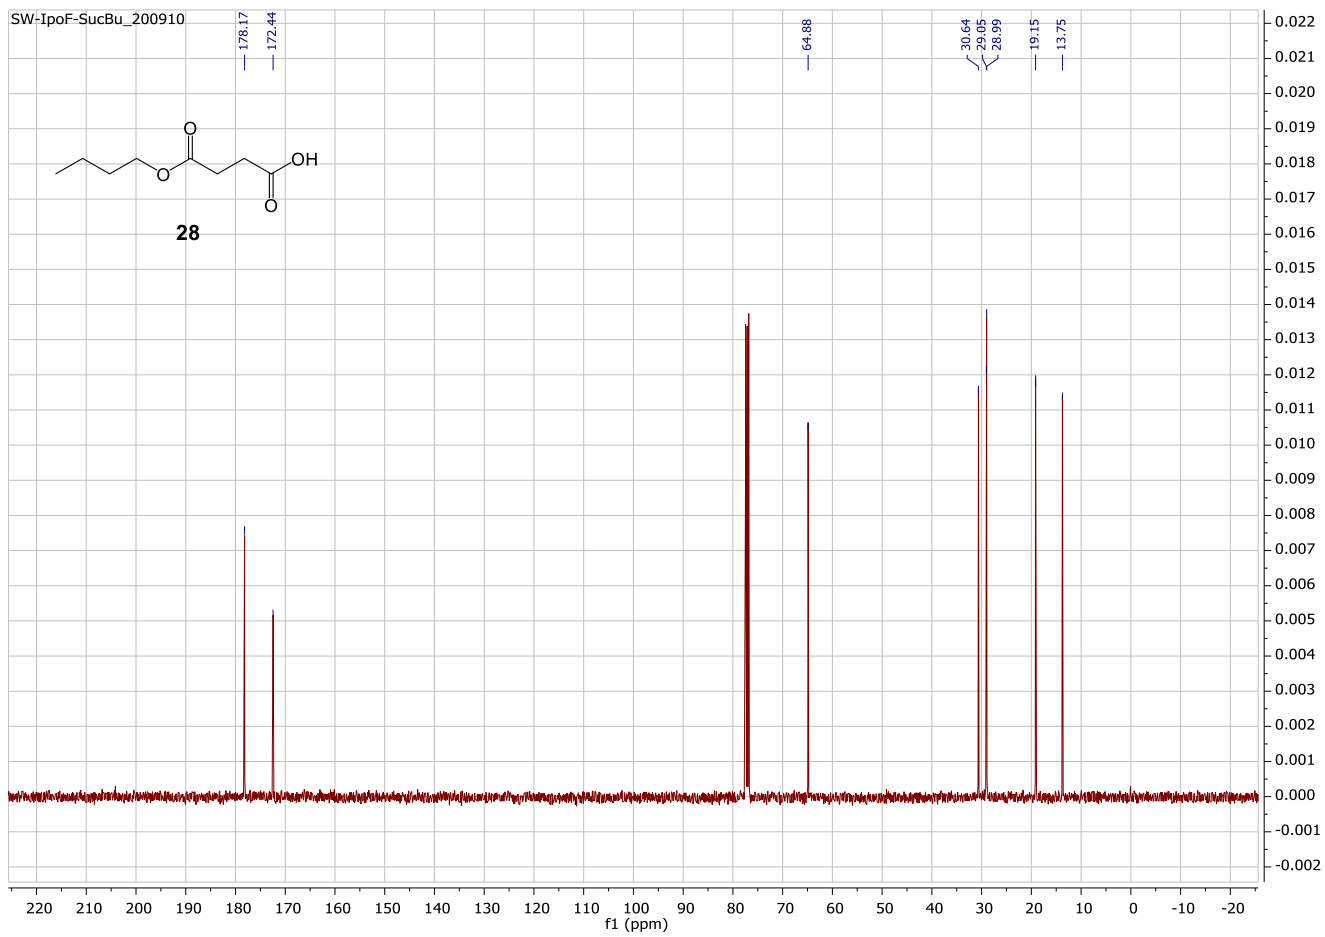

SW-IpoF-Fuc-Step4\_210414

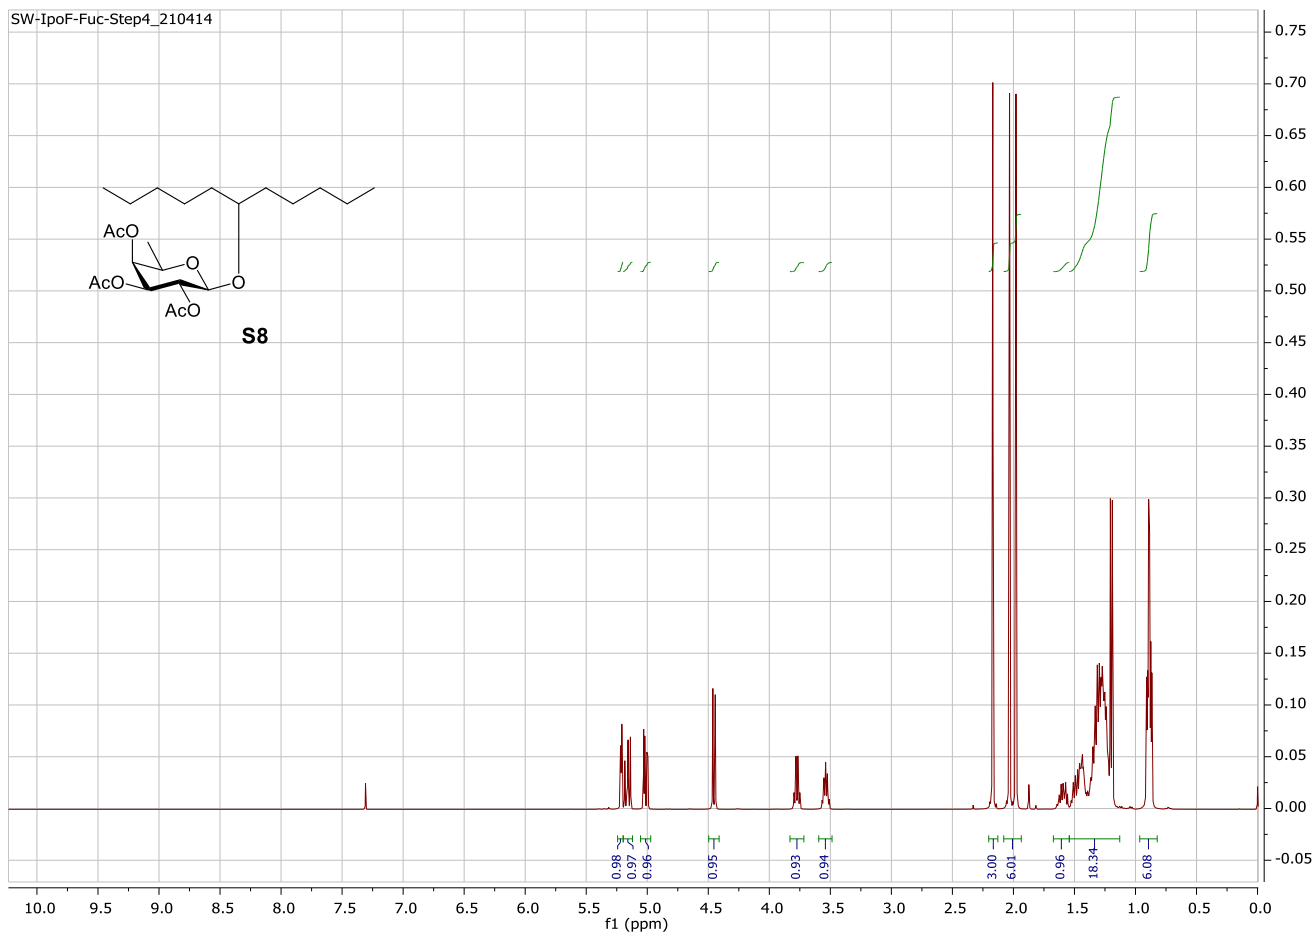

SW-IpoF-Fuc-Step4\_210414

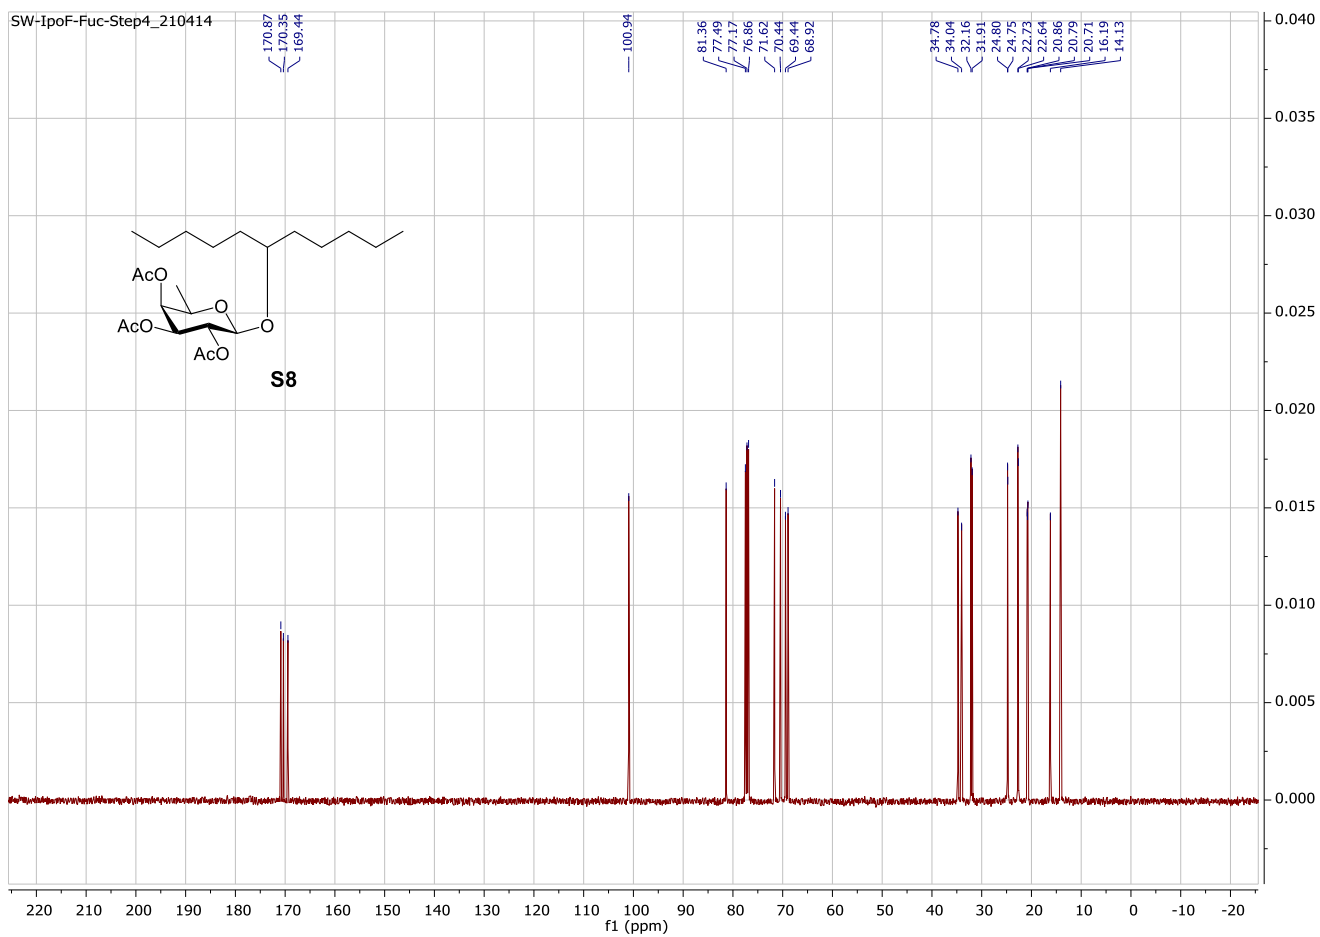

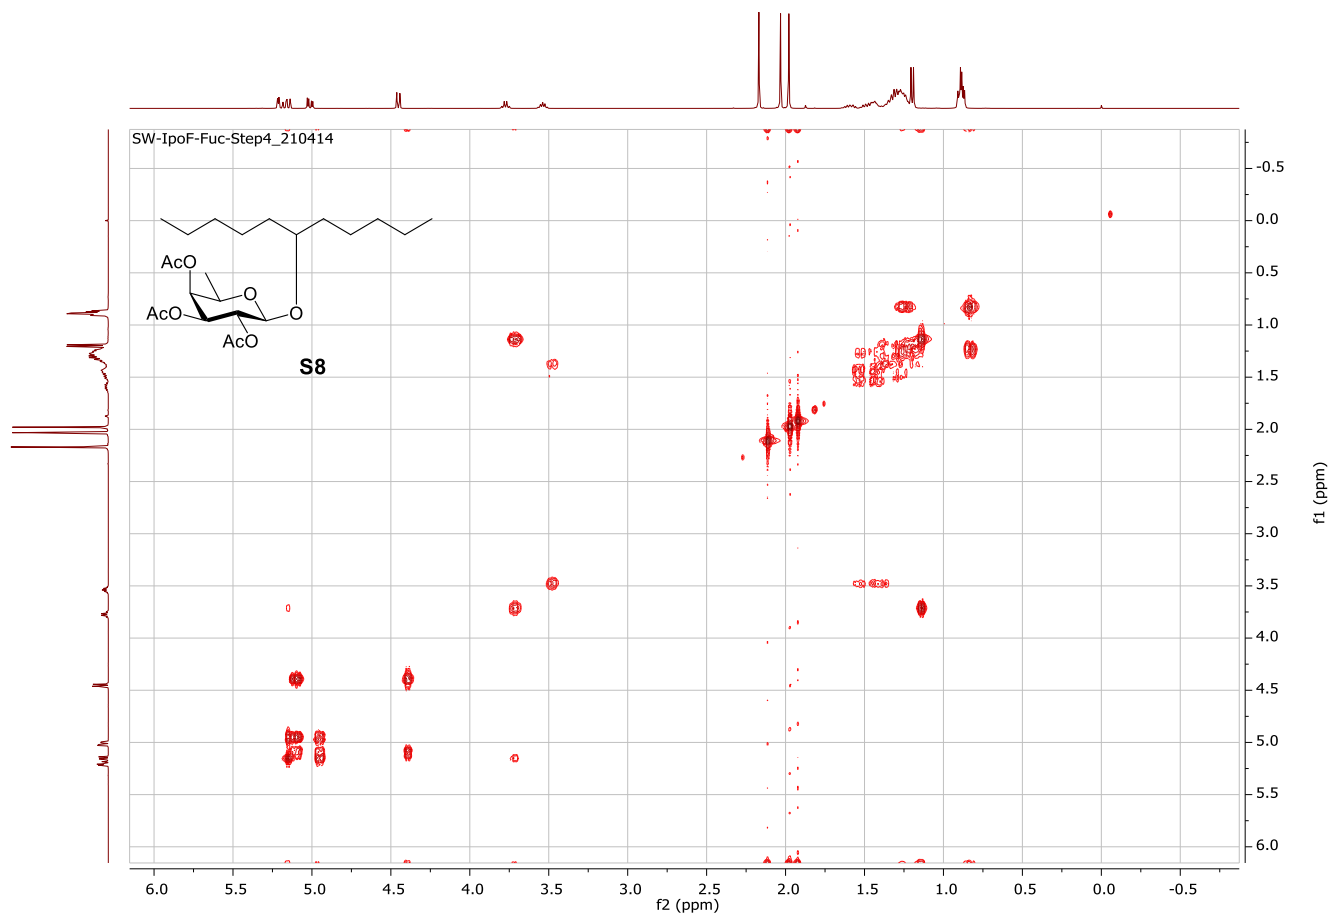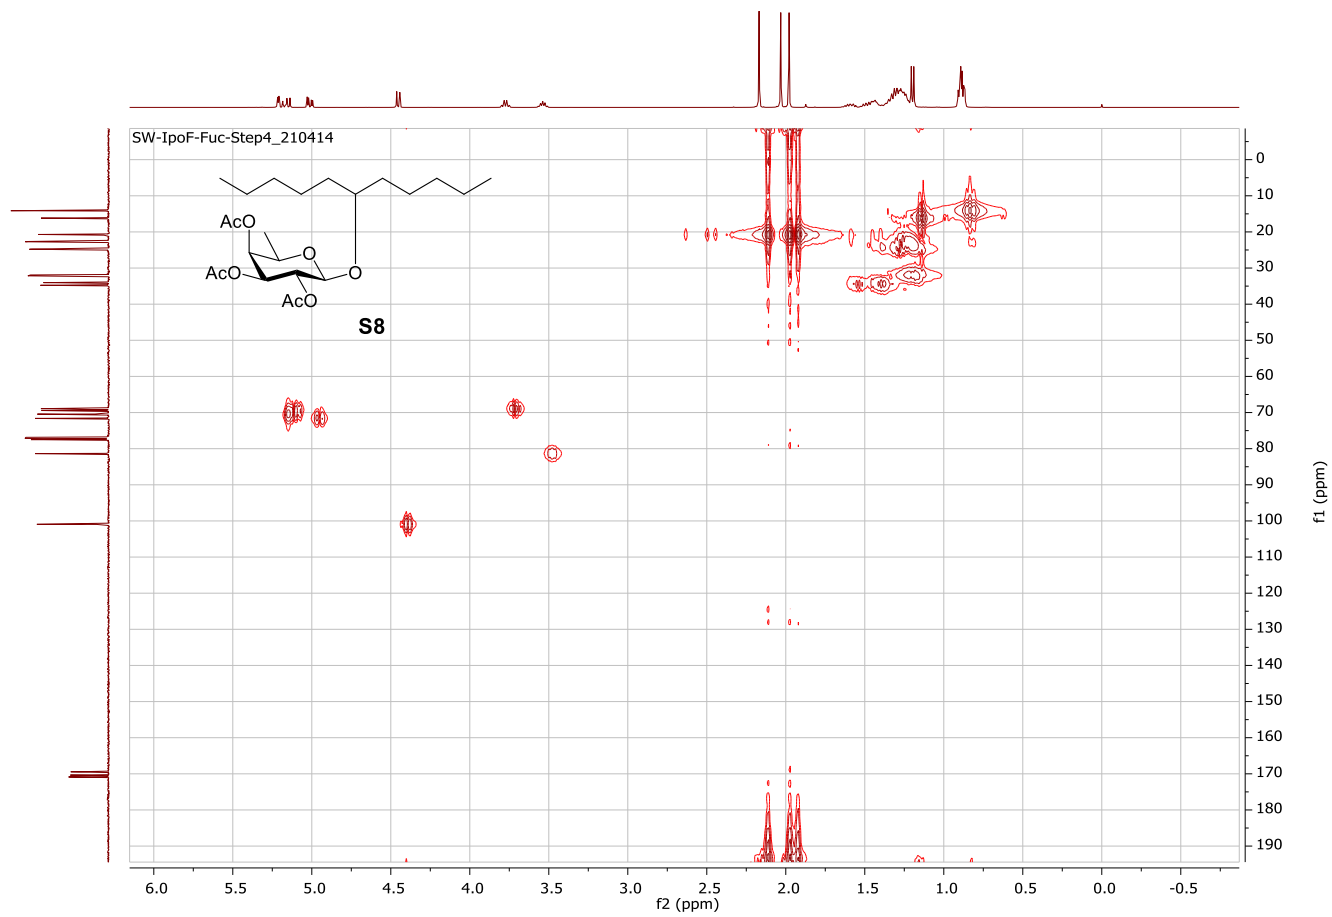

SW-IpoF-Fuc-Step5\_210419

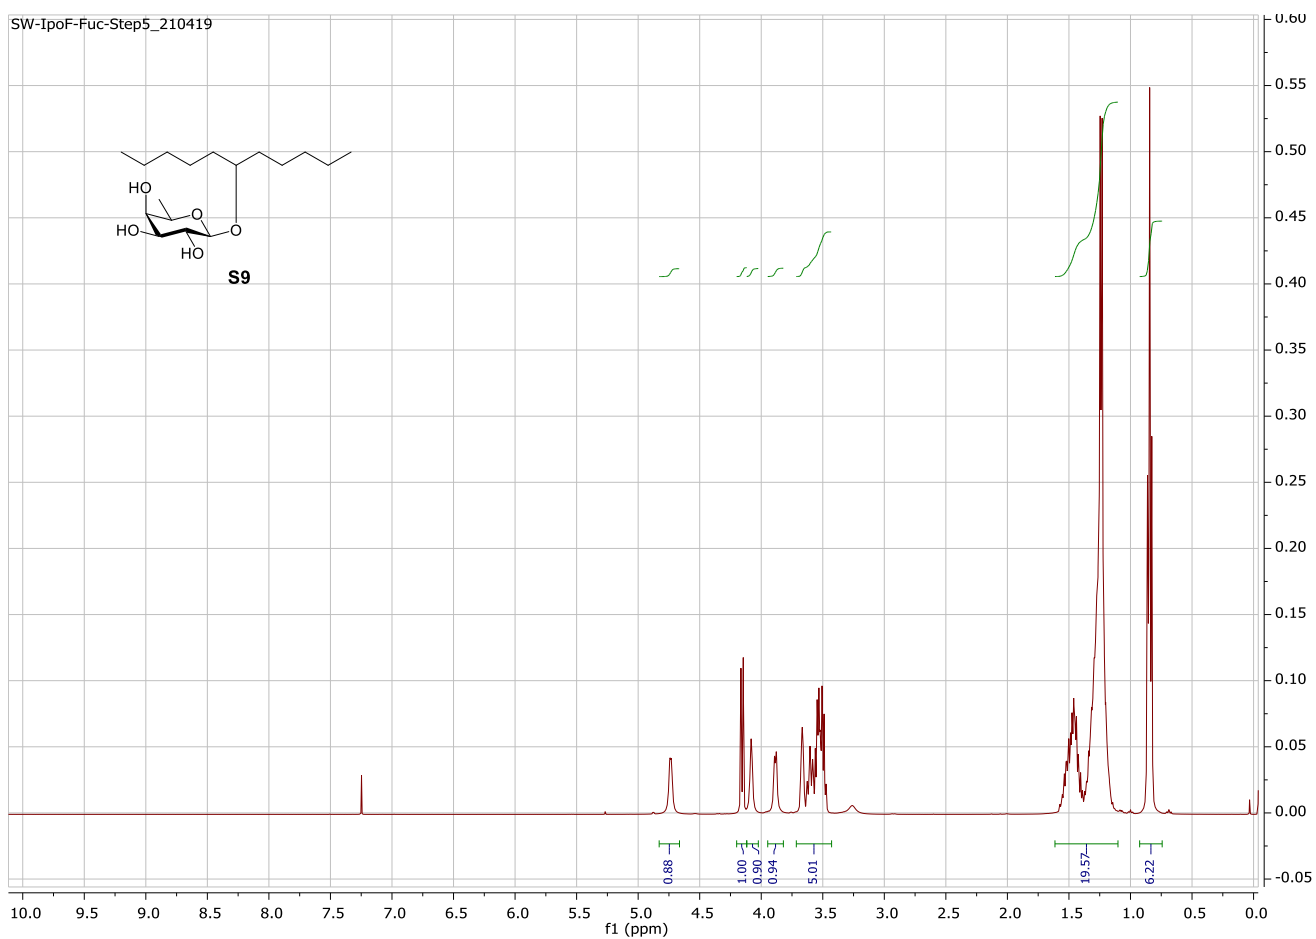

SW-IpoF-Fuc-Step5\_210419

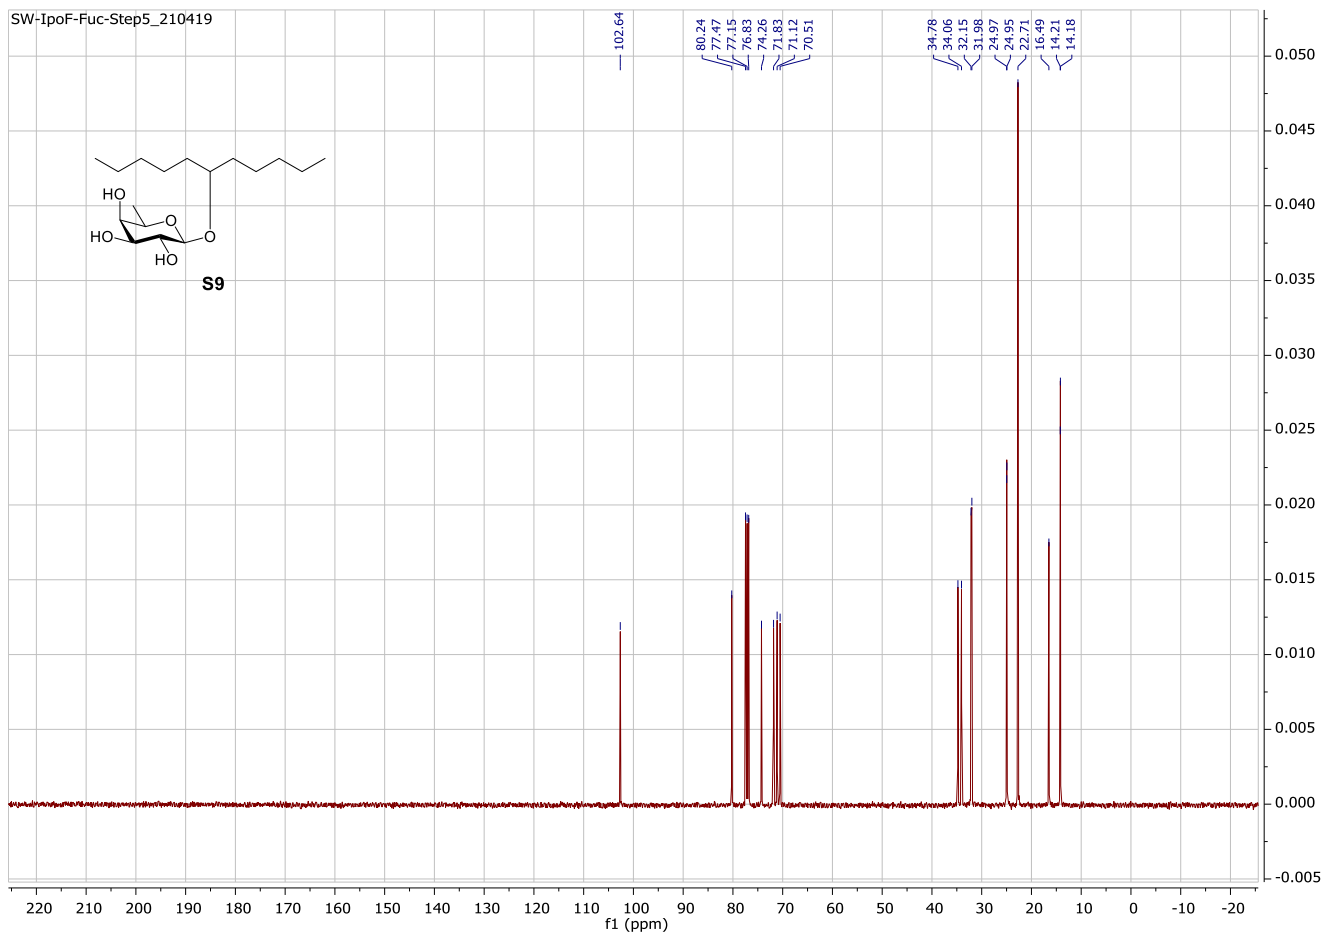

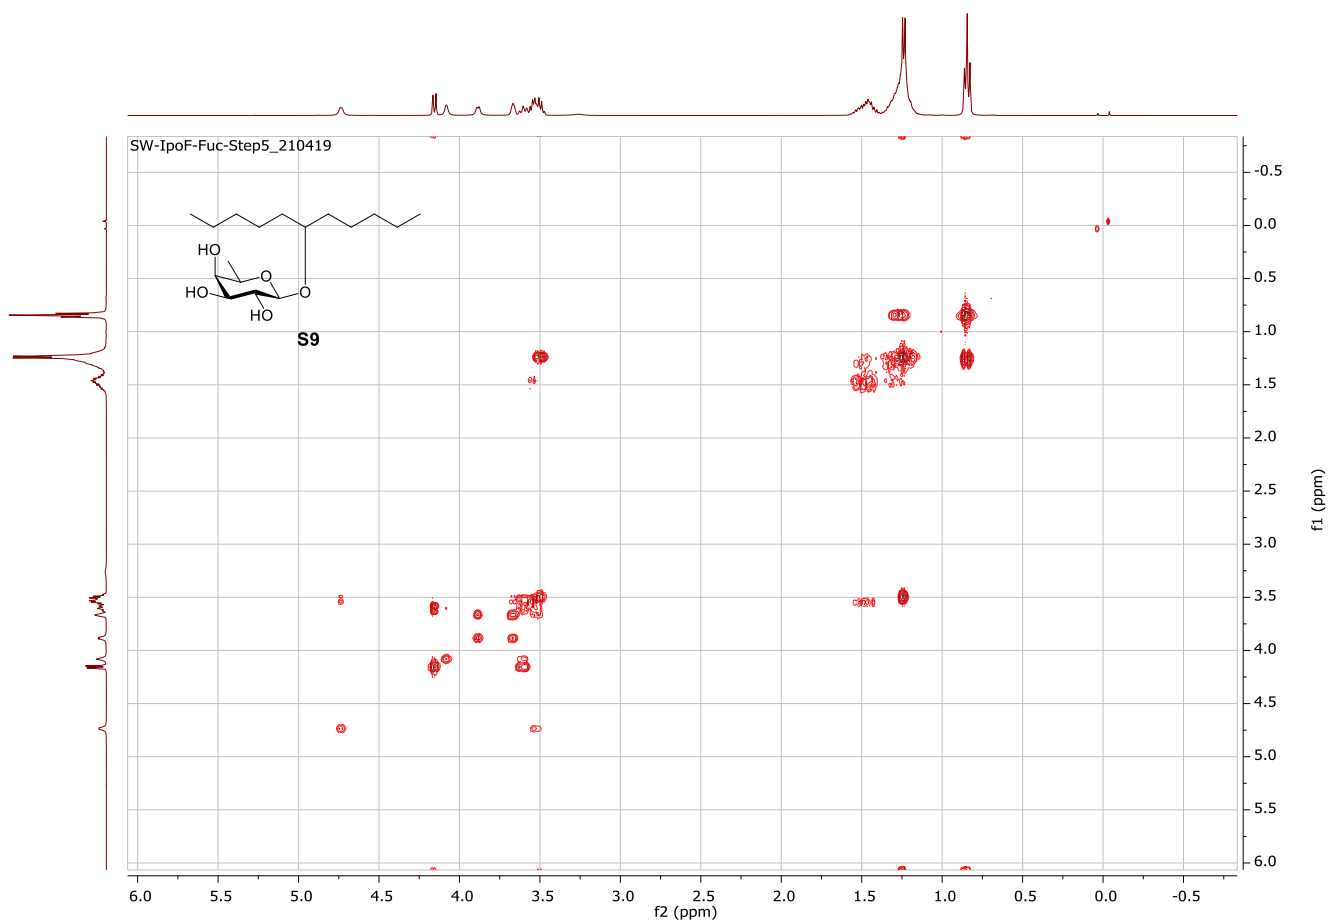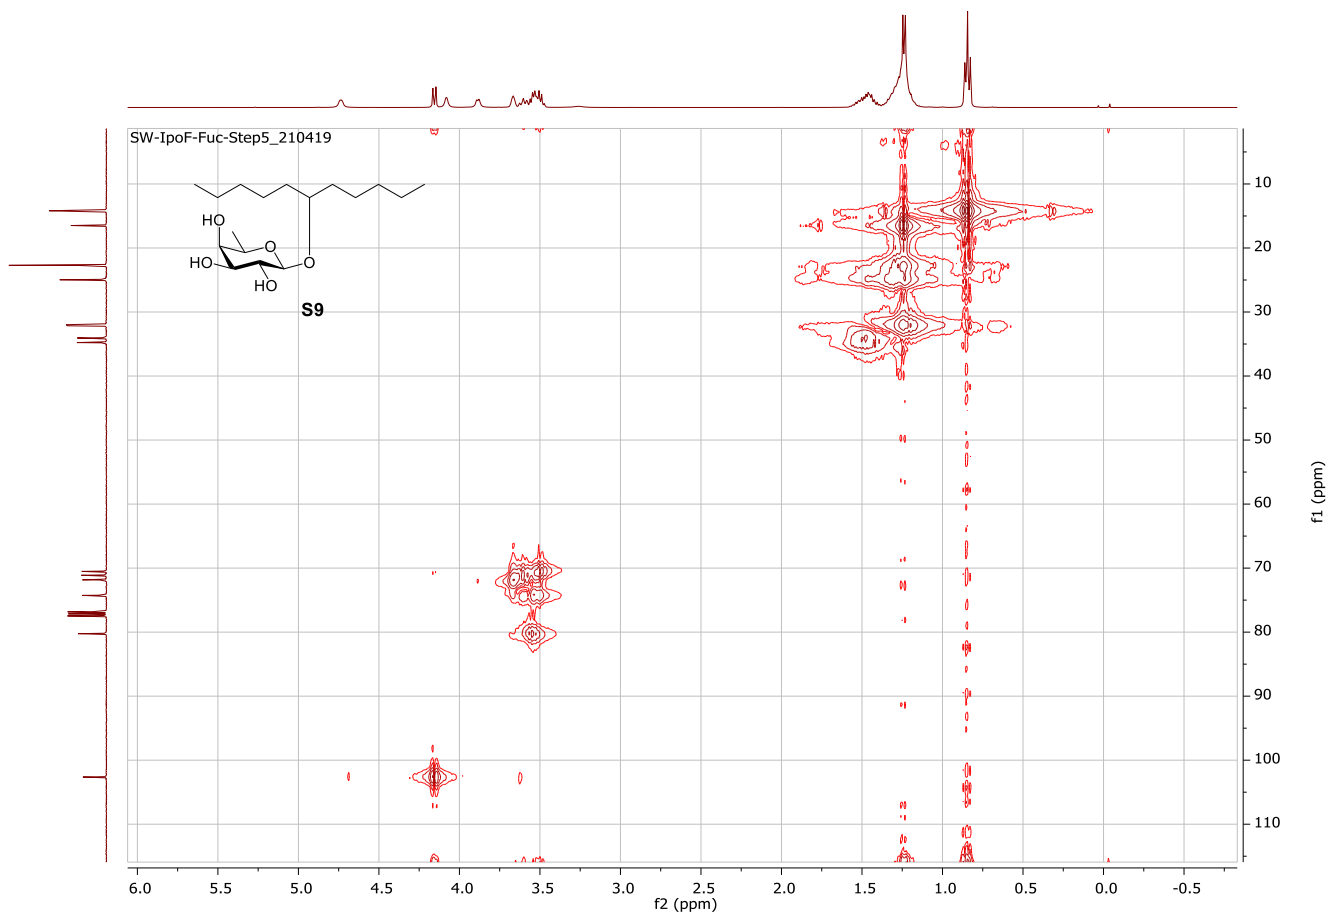

SW-IpoF-Fuc-Step6\_210423

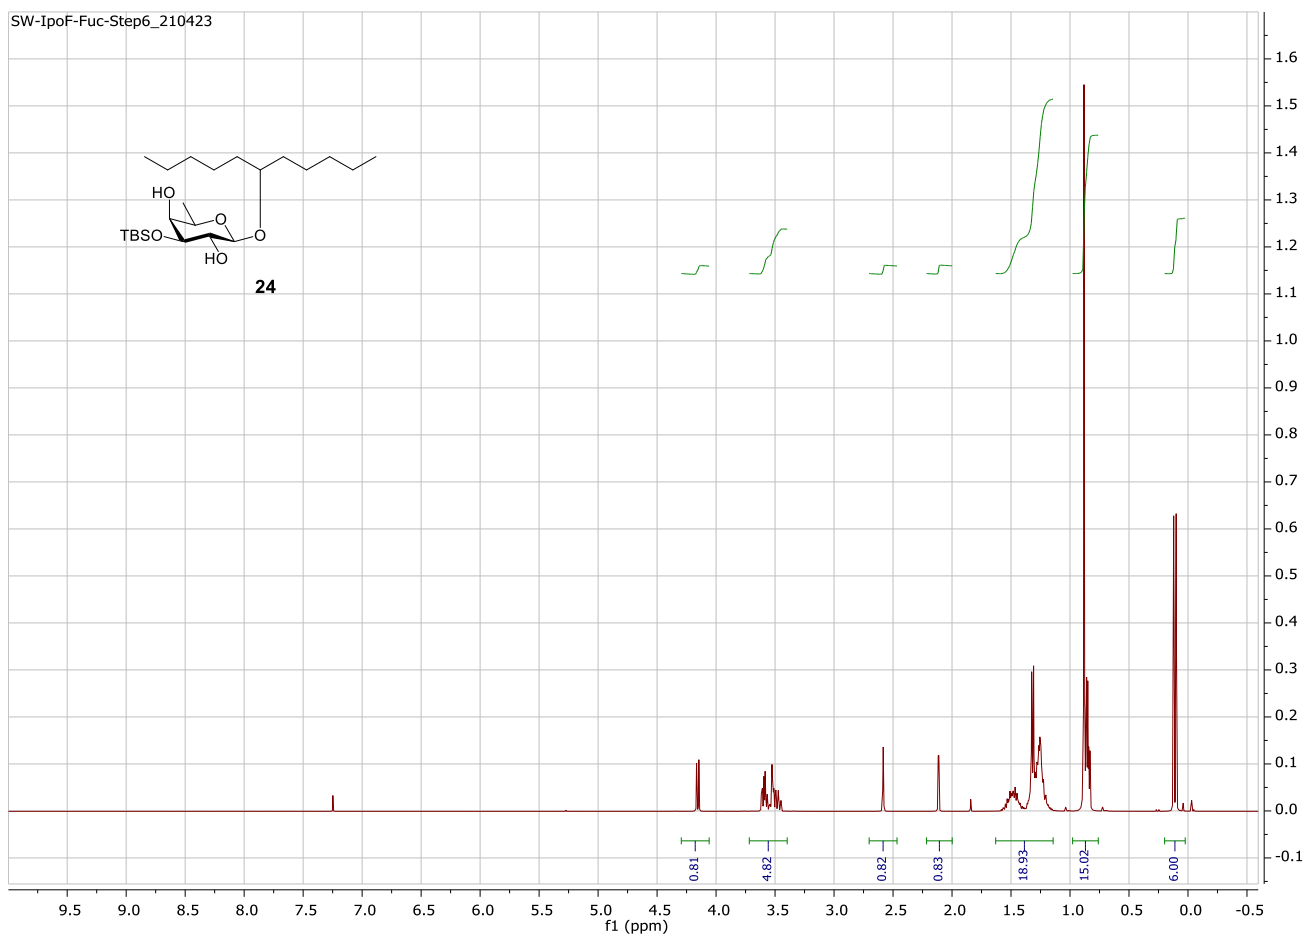

SW-IpoF-Fuc-Step6\_210423

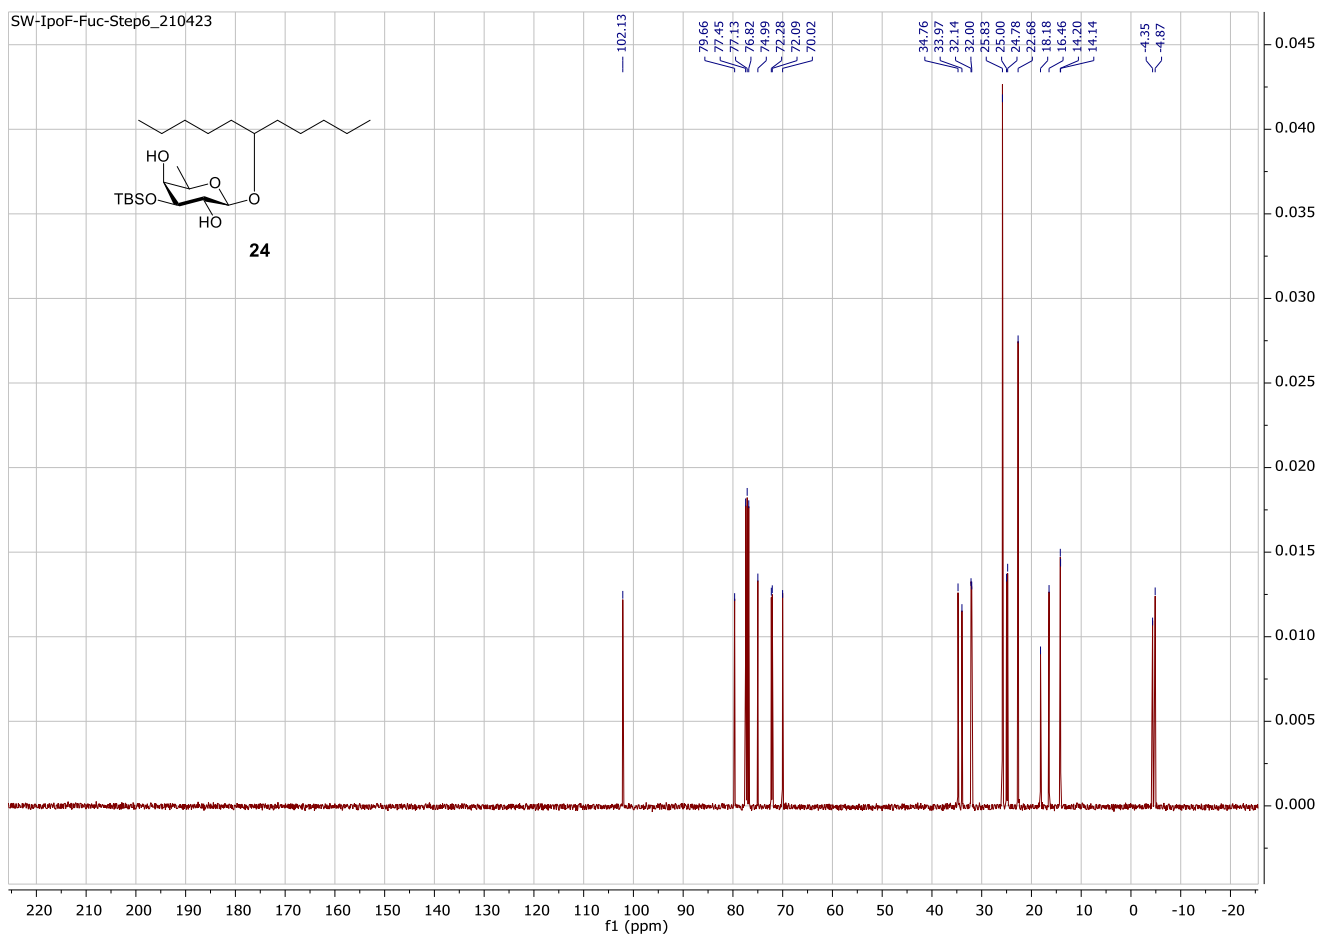

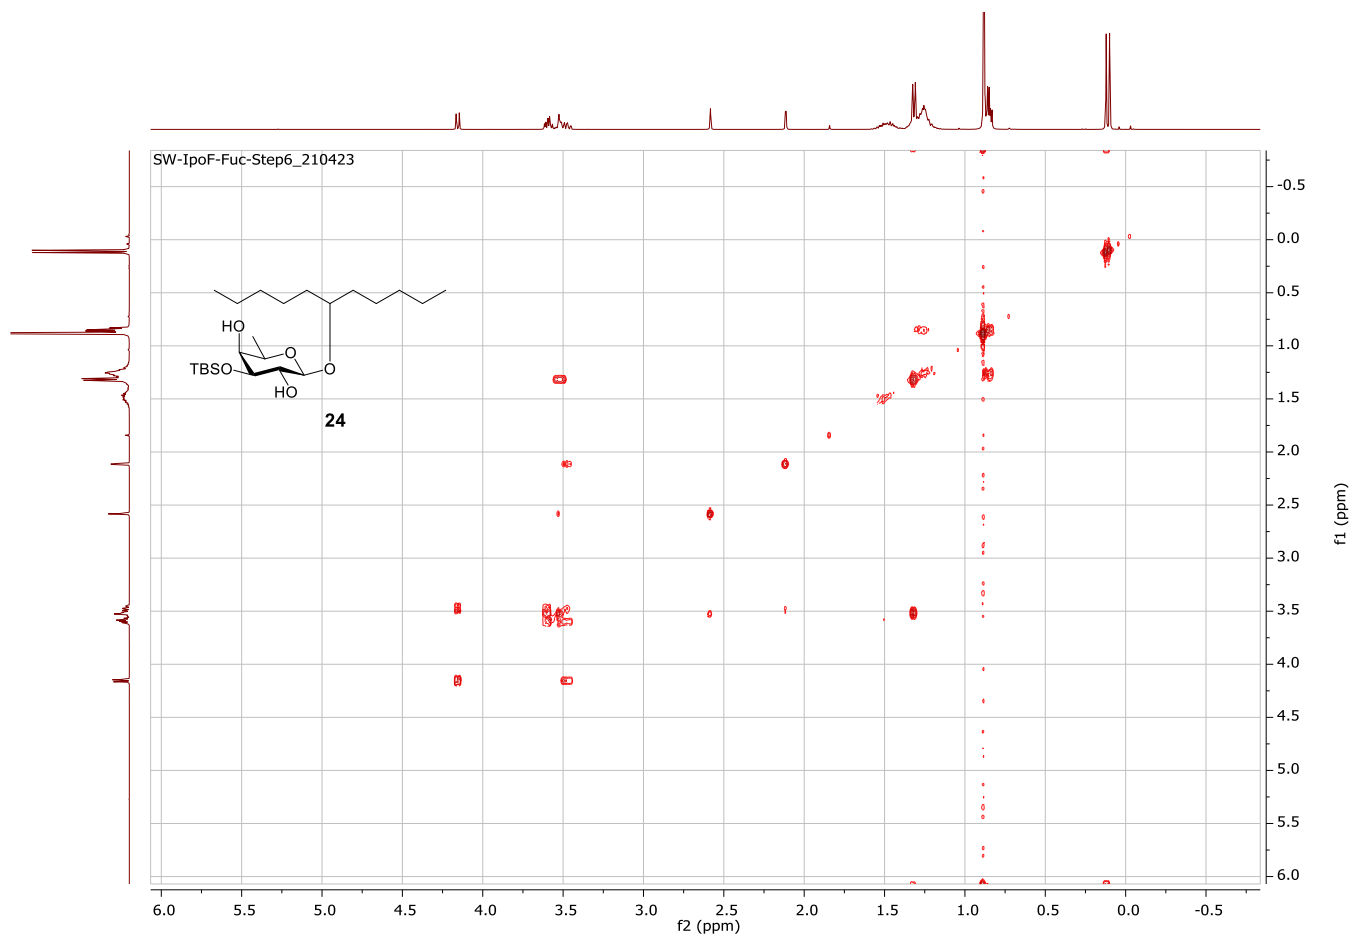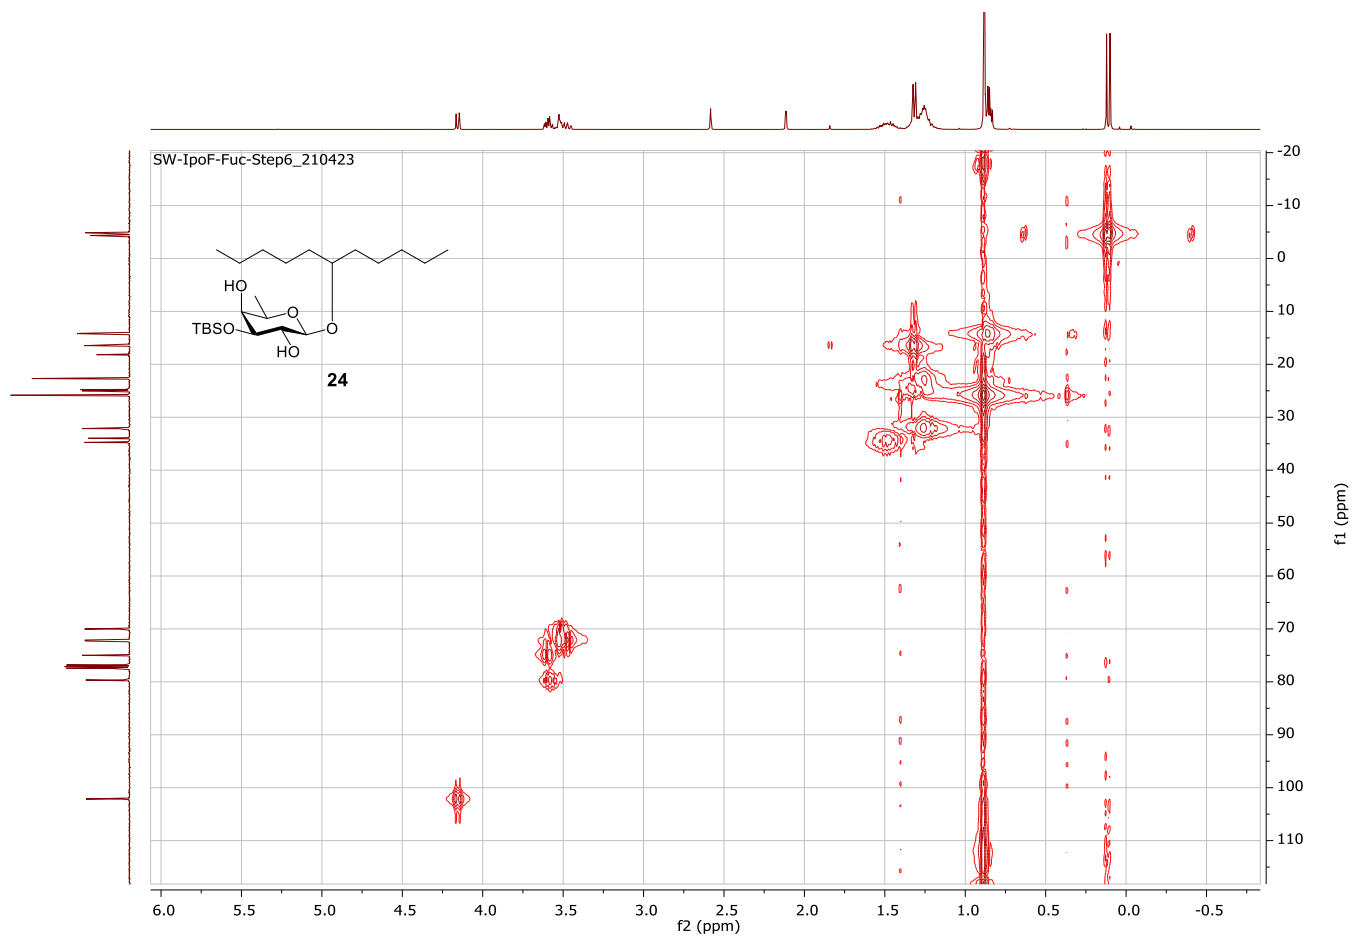



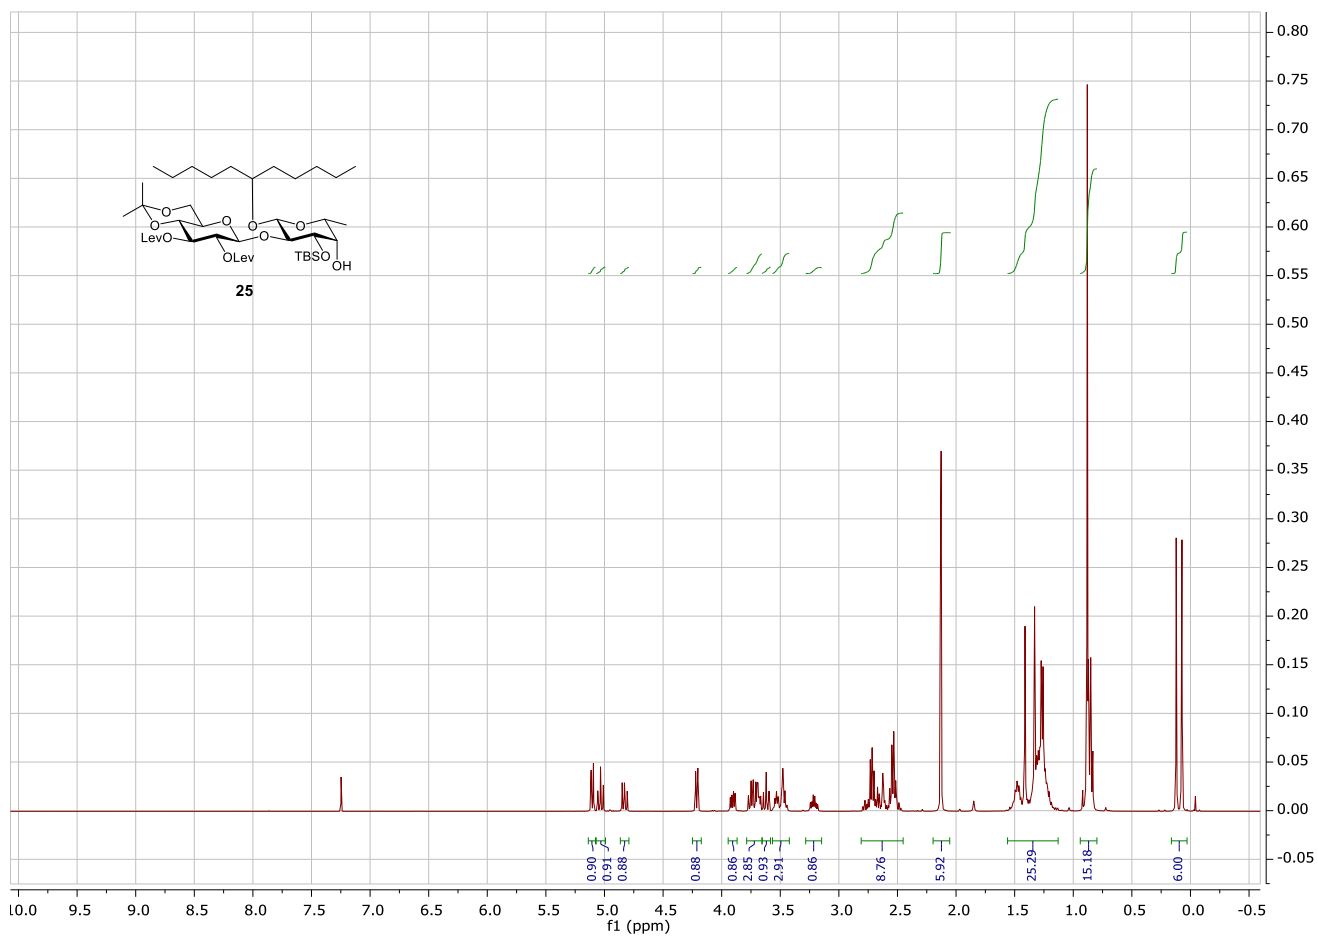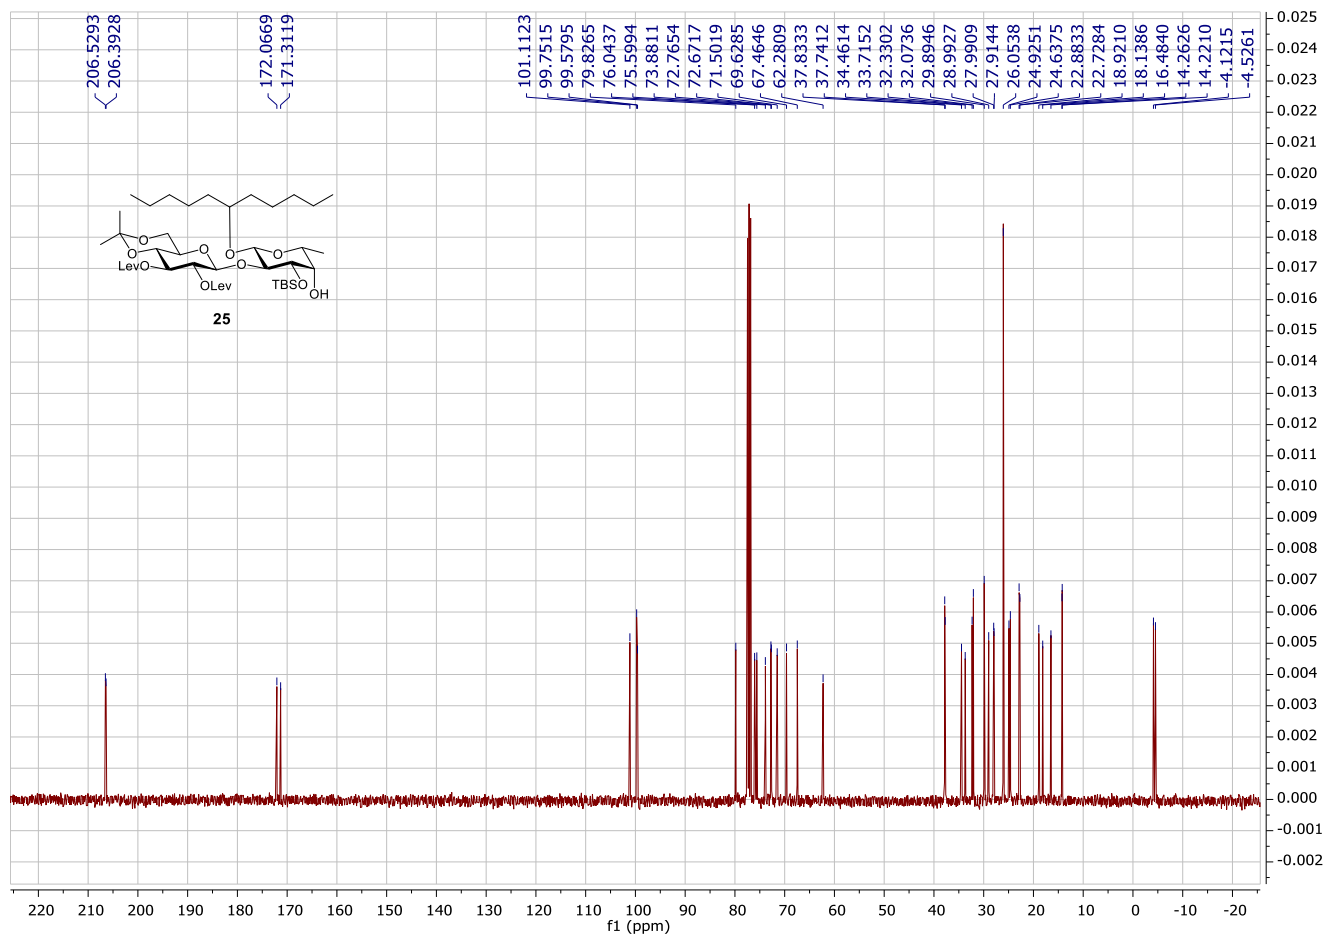

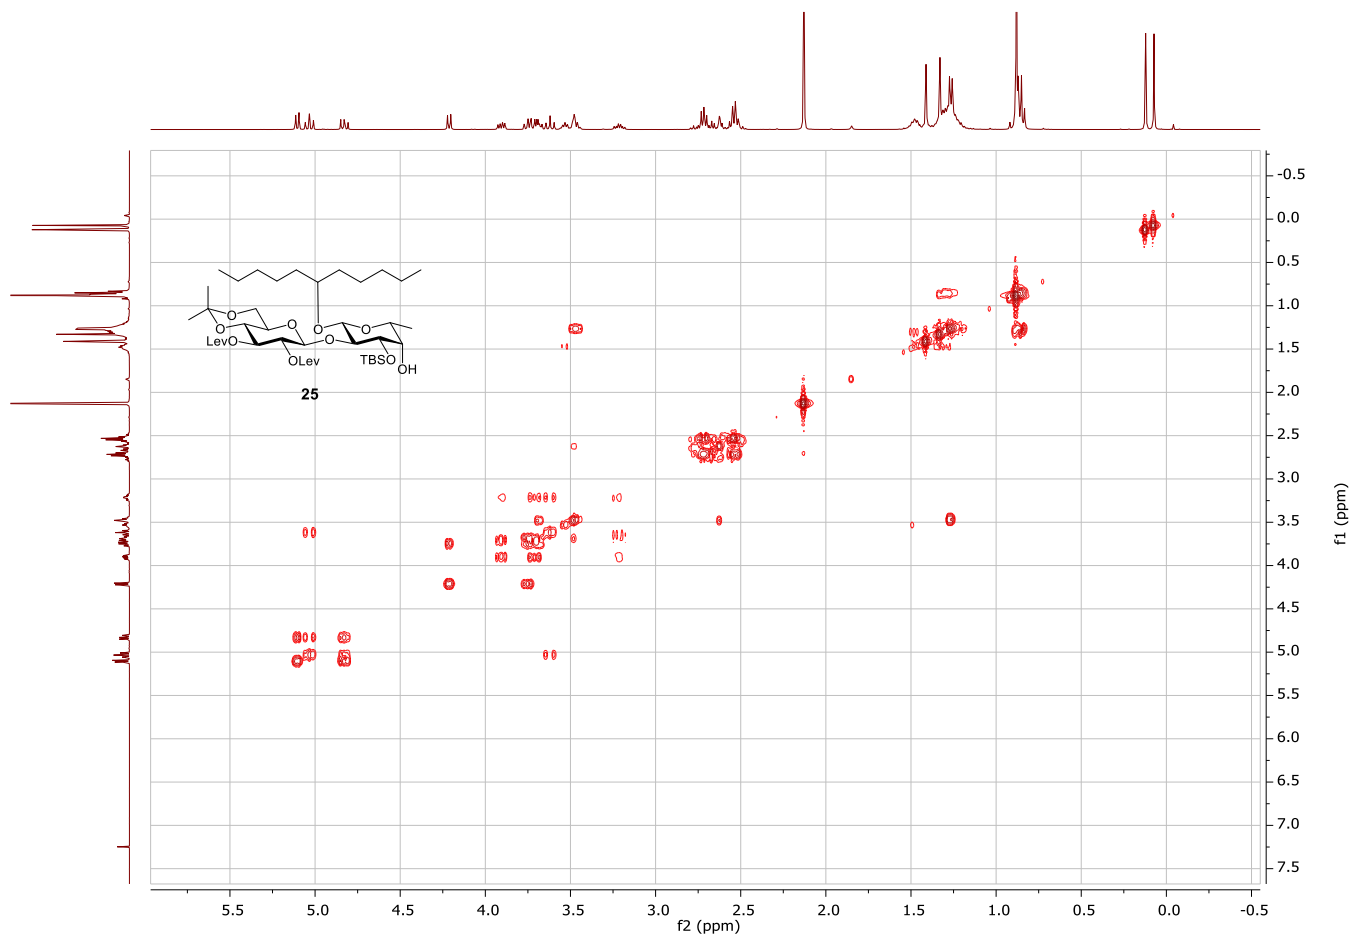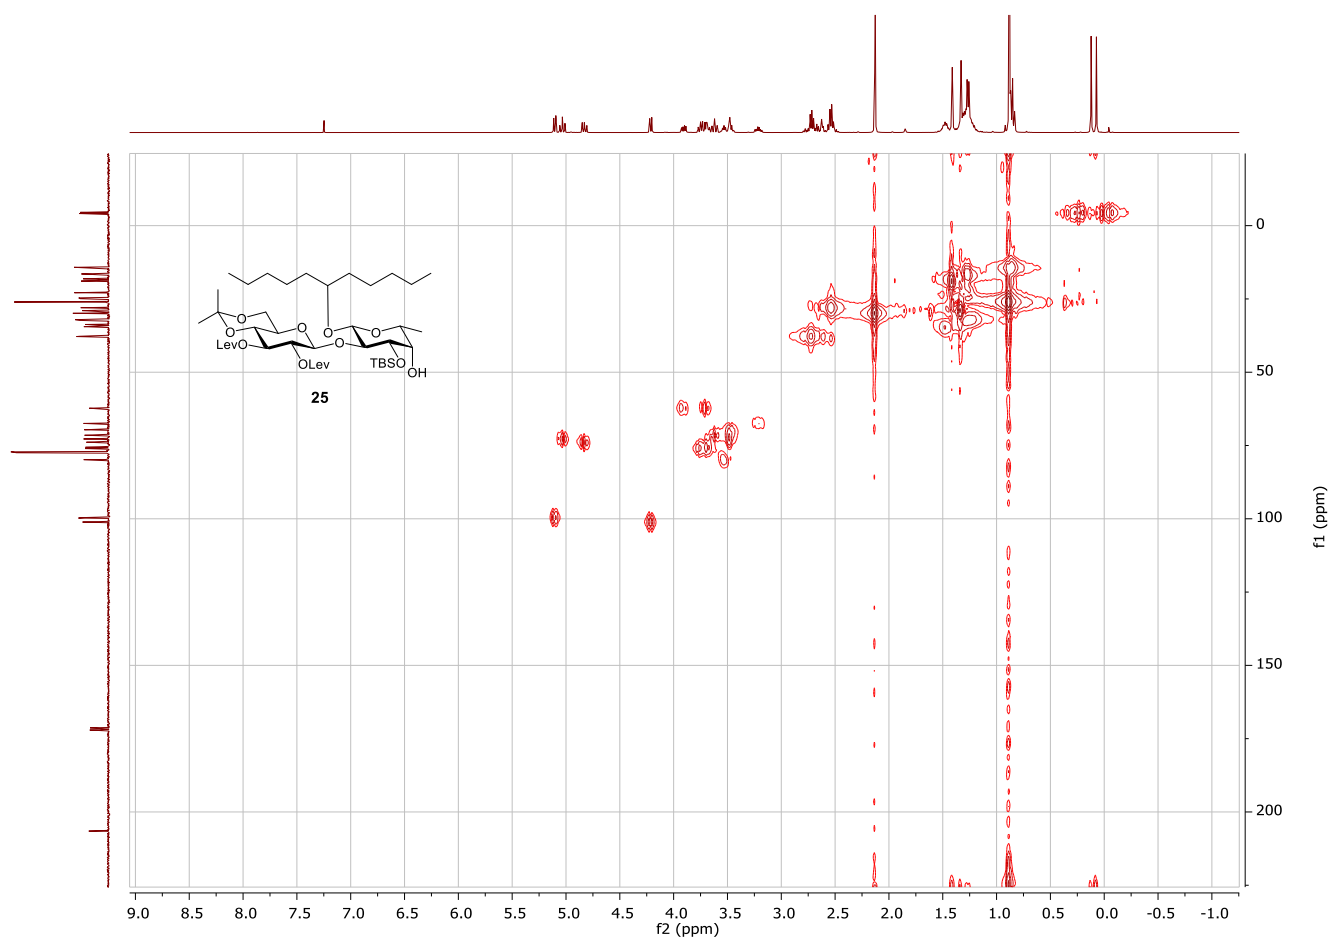

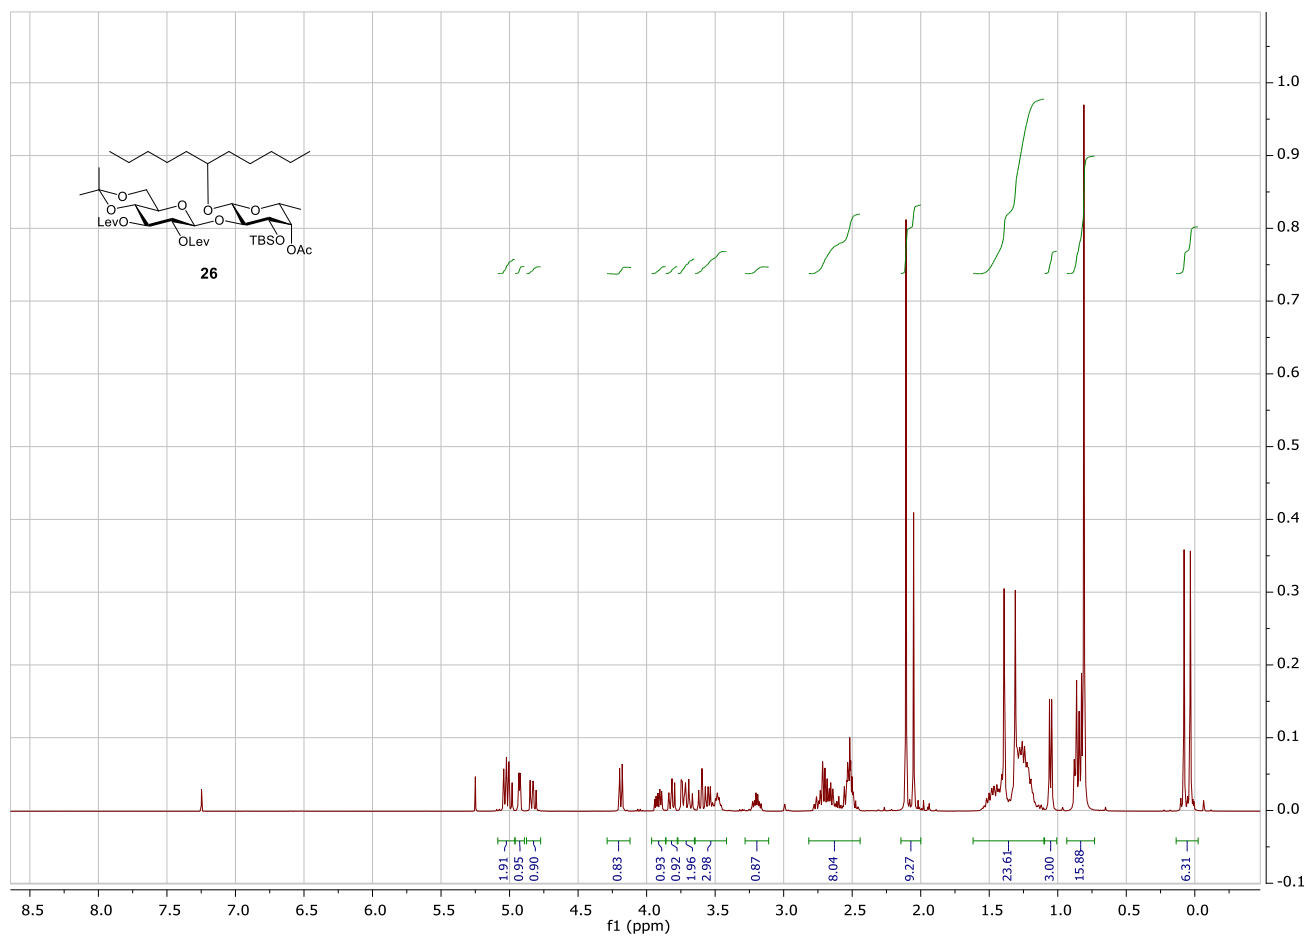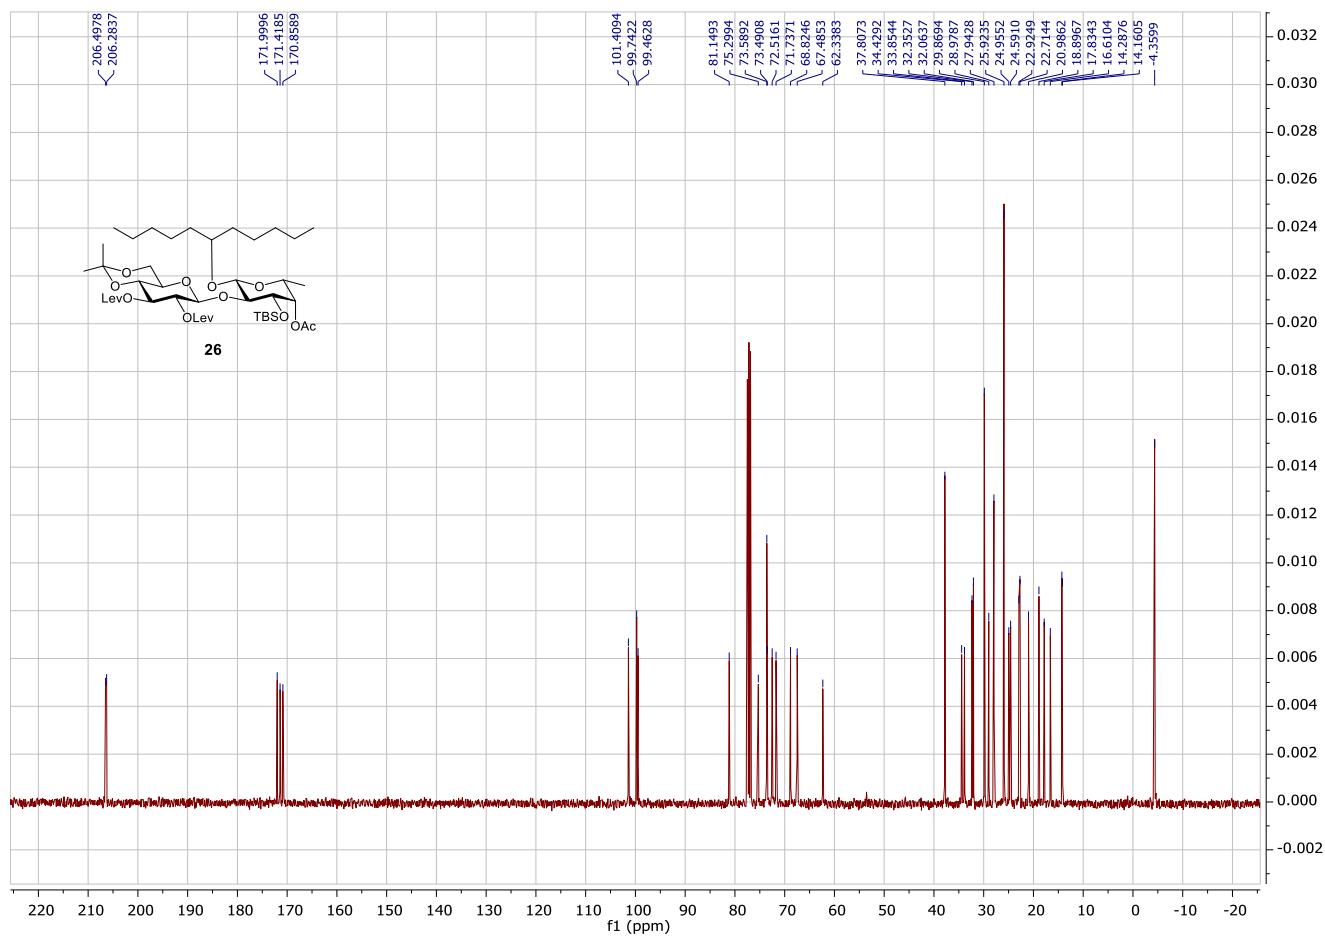

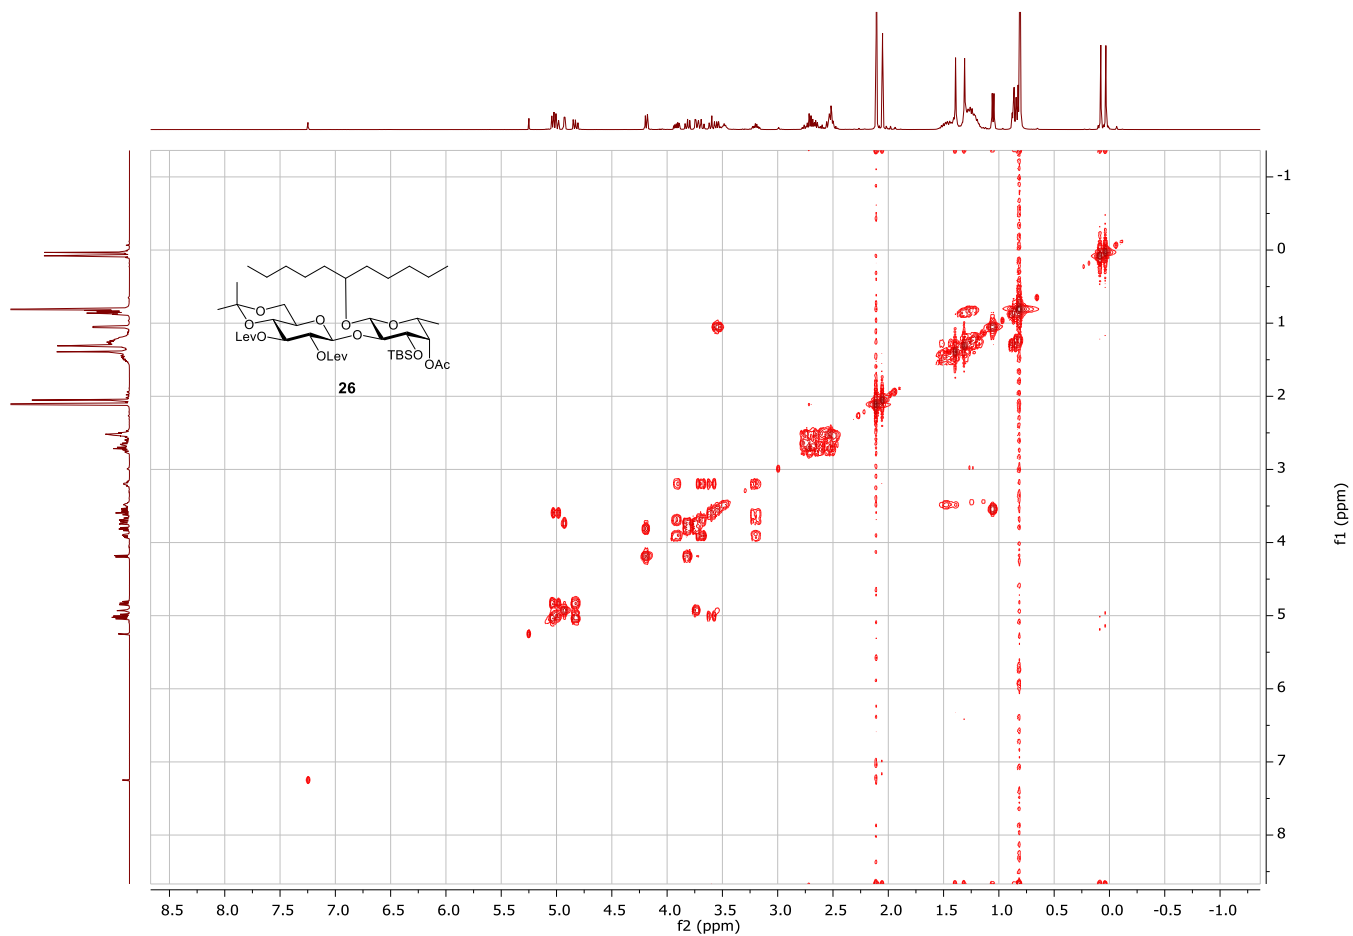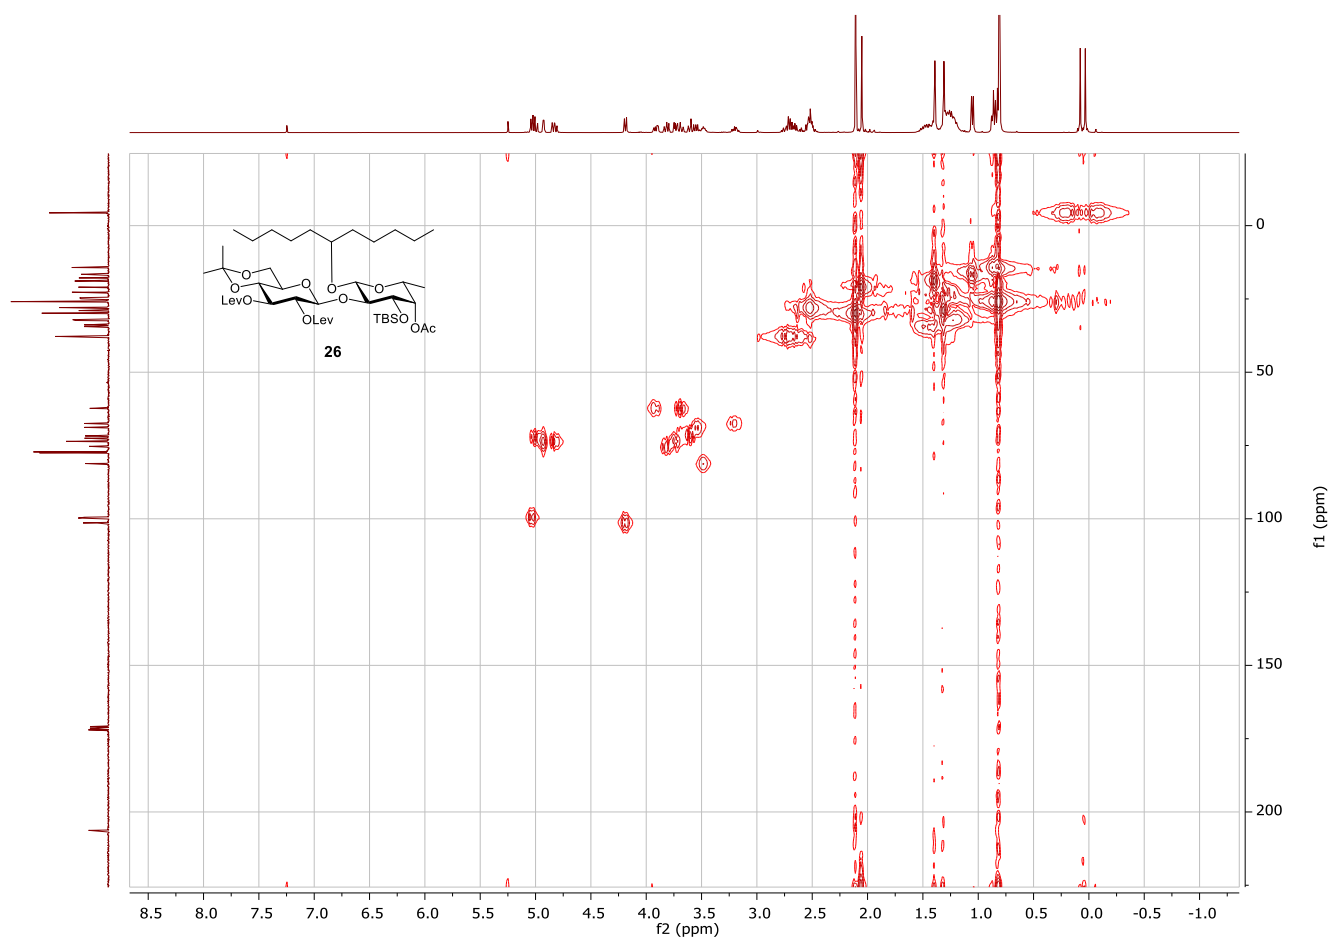

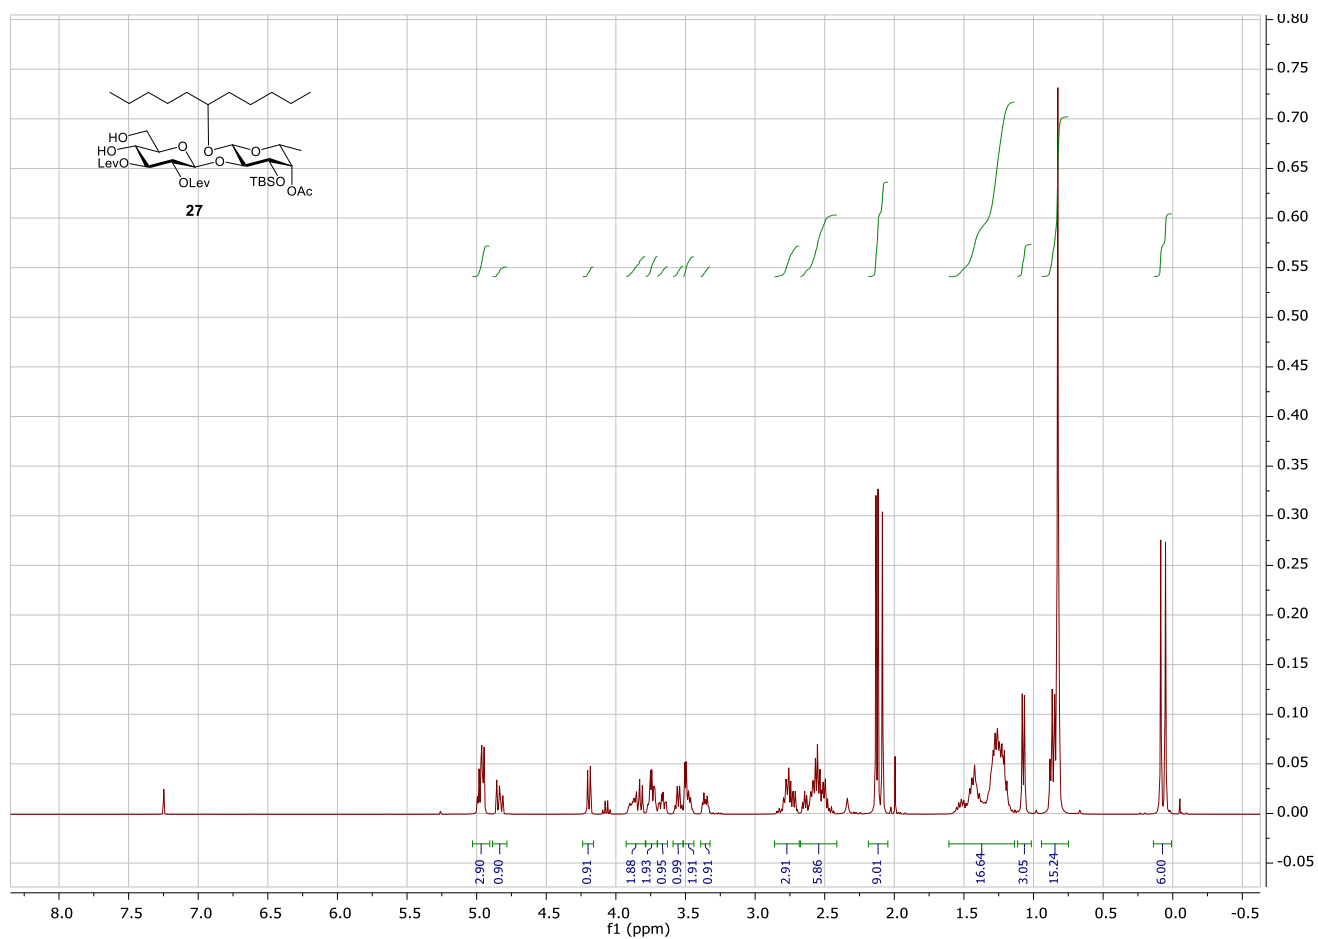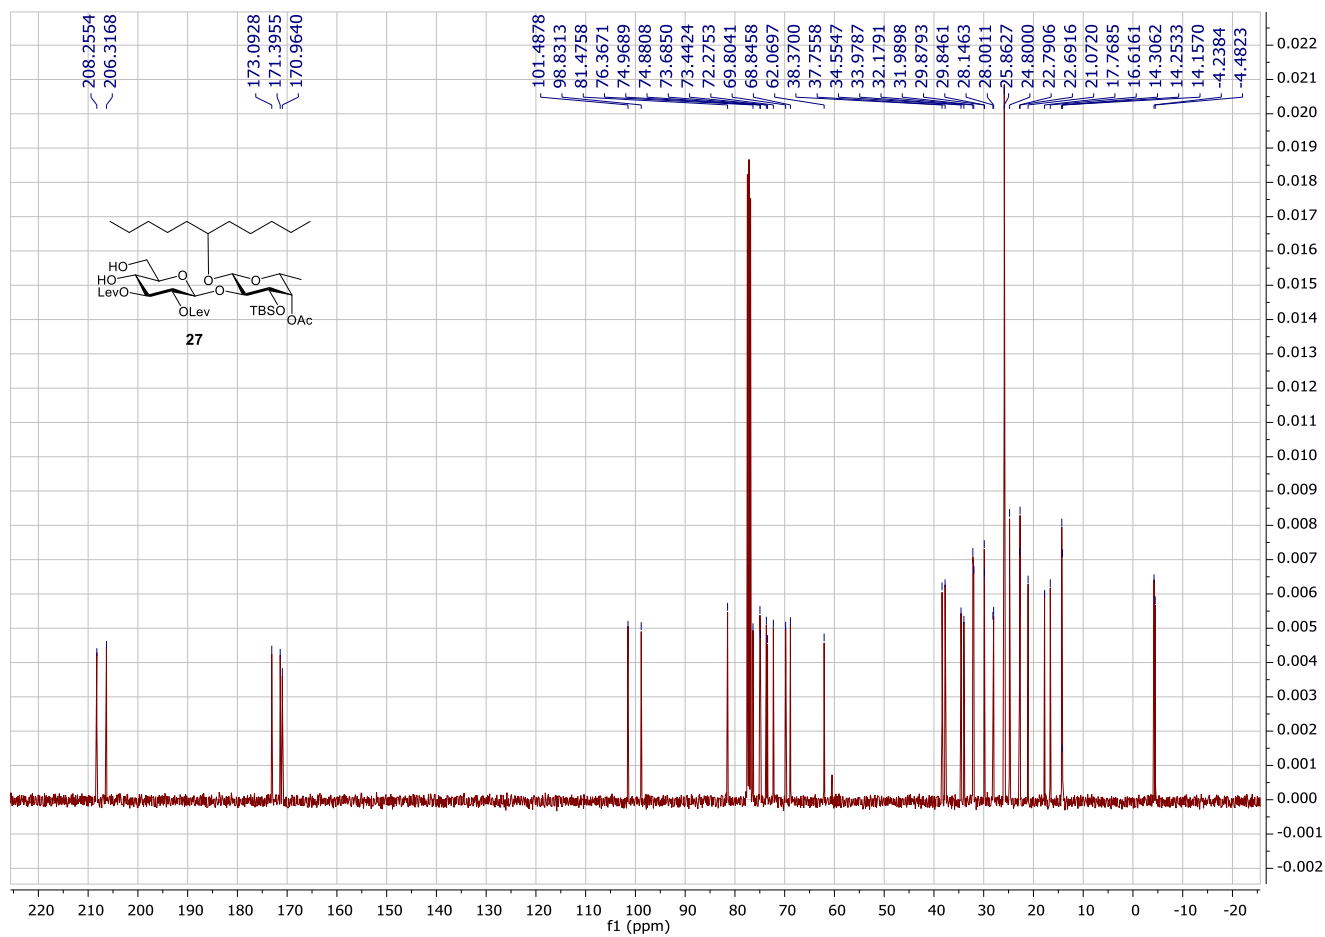

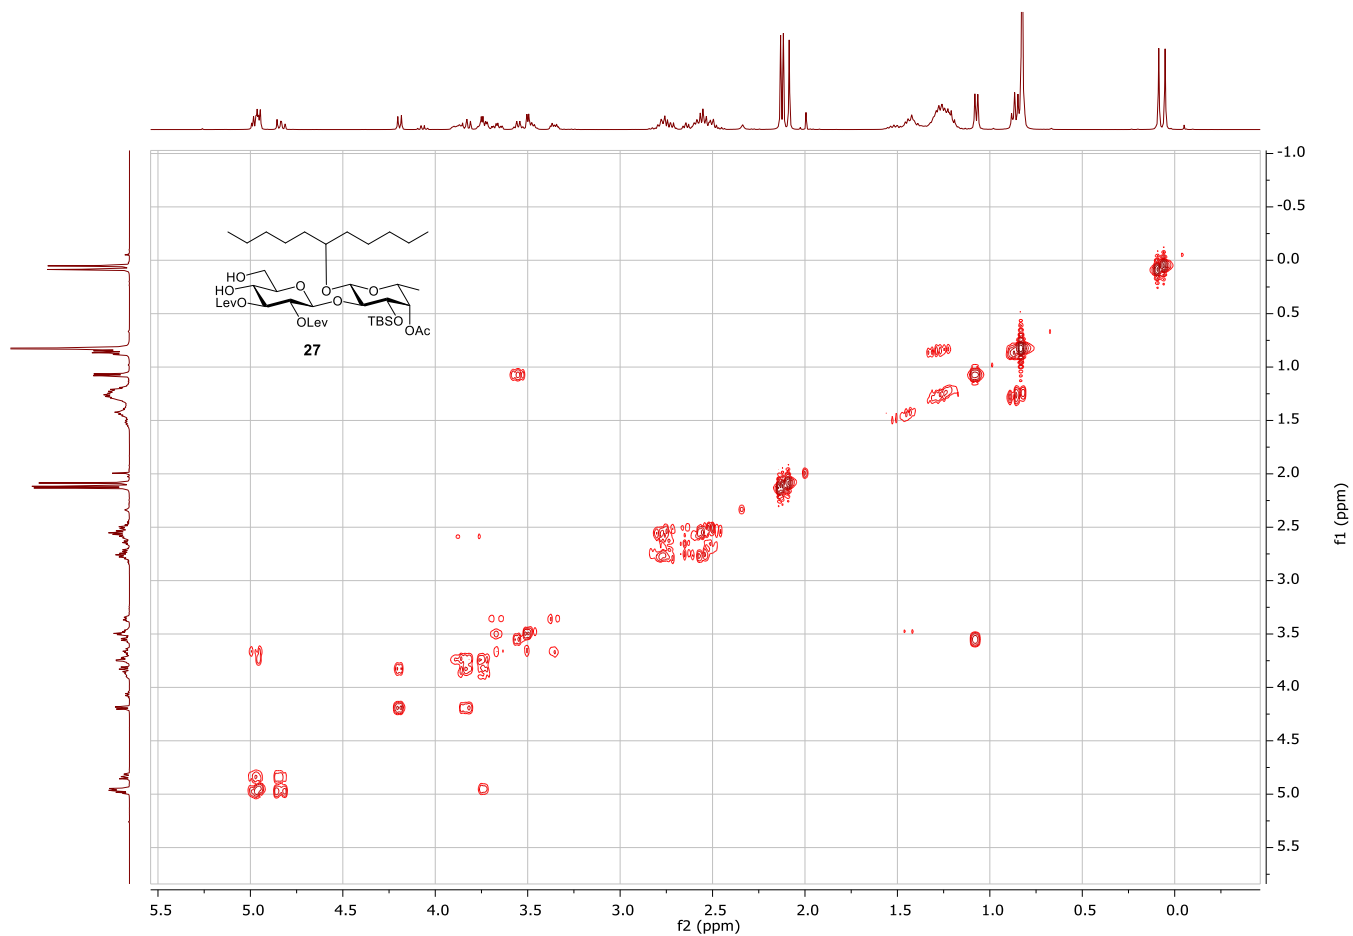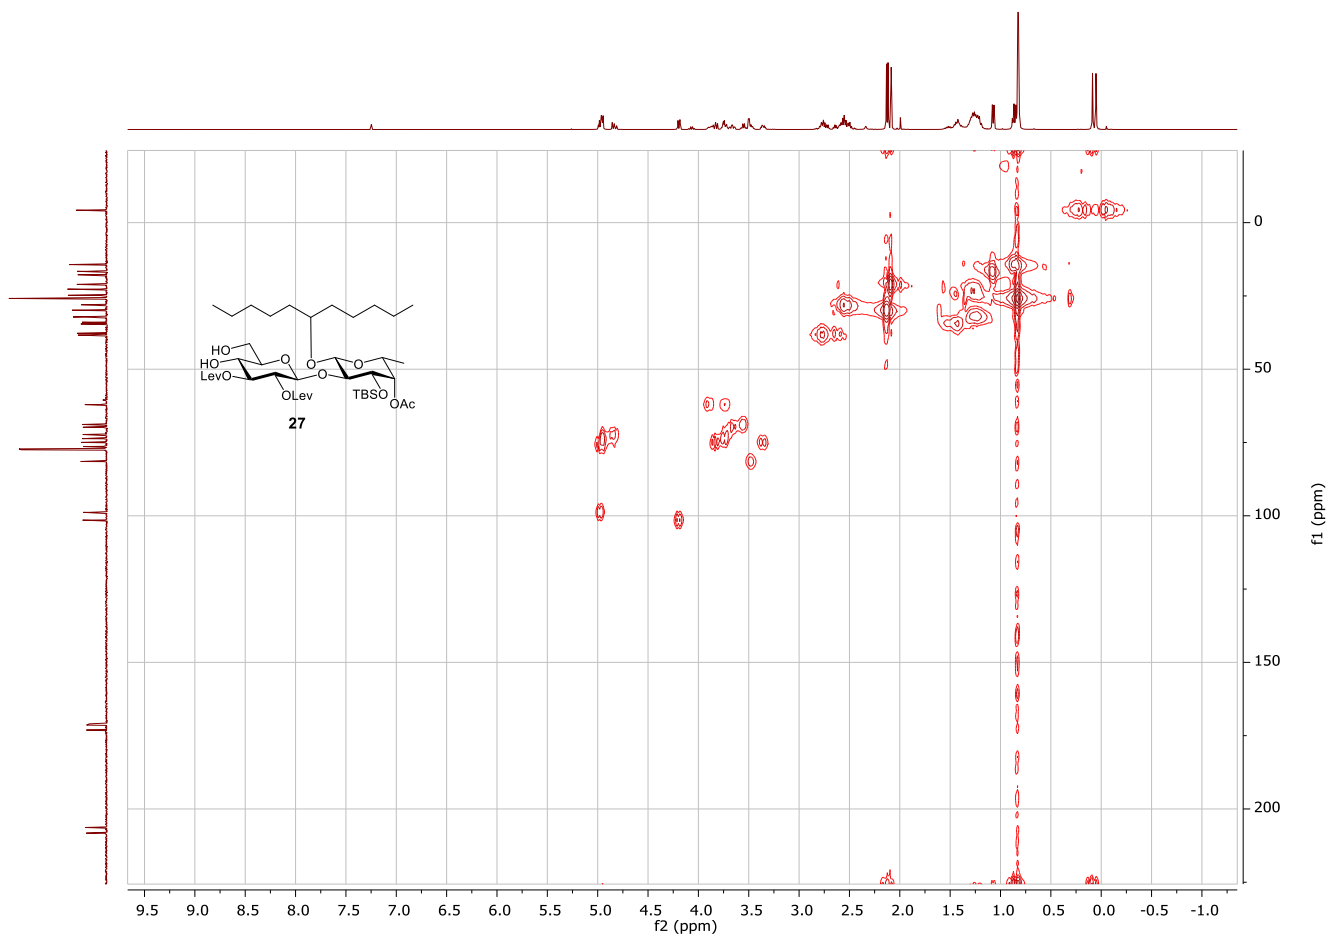

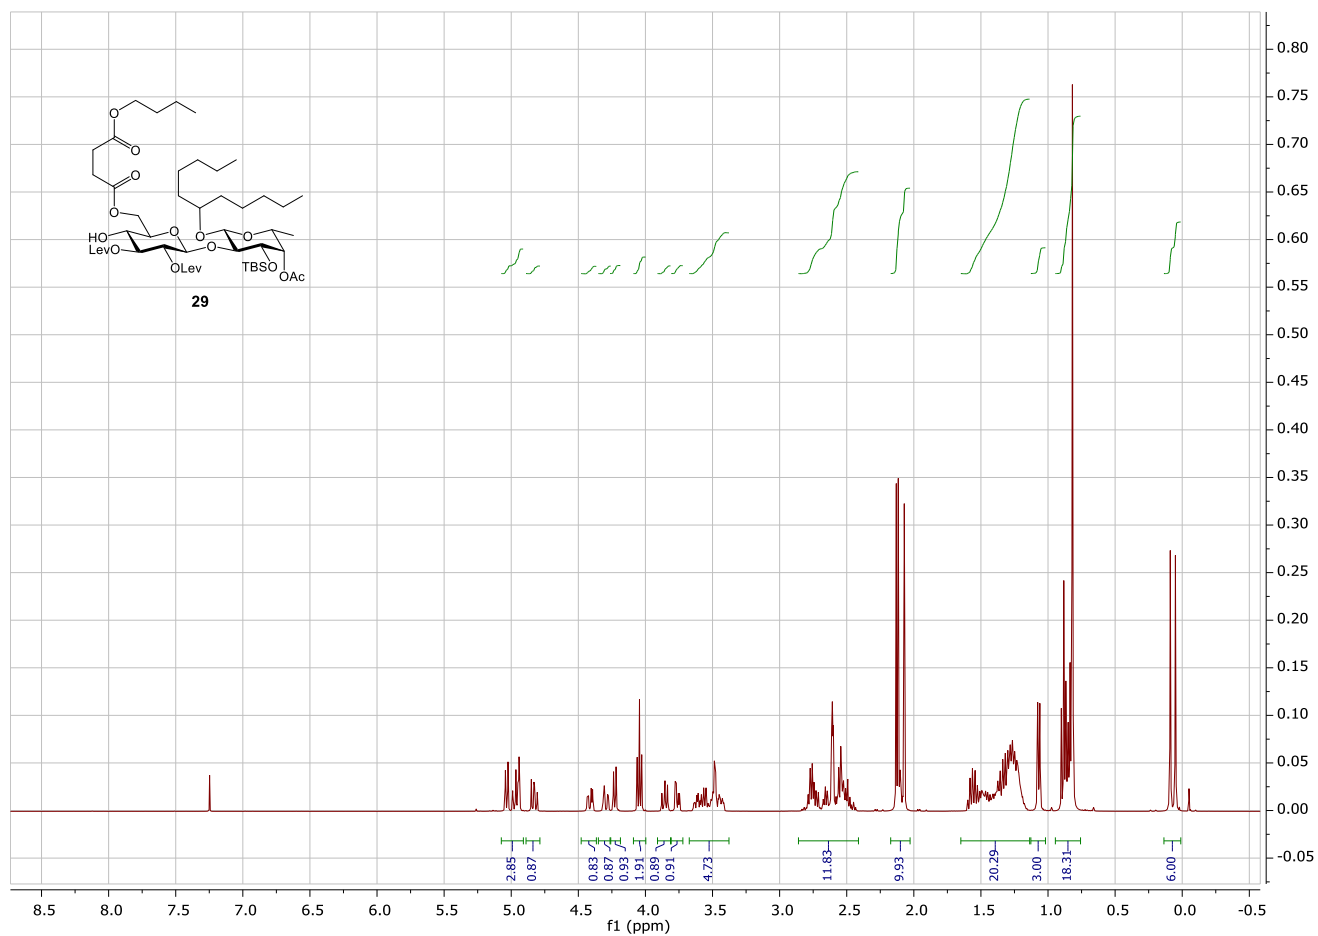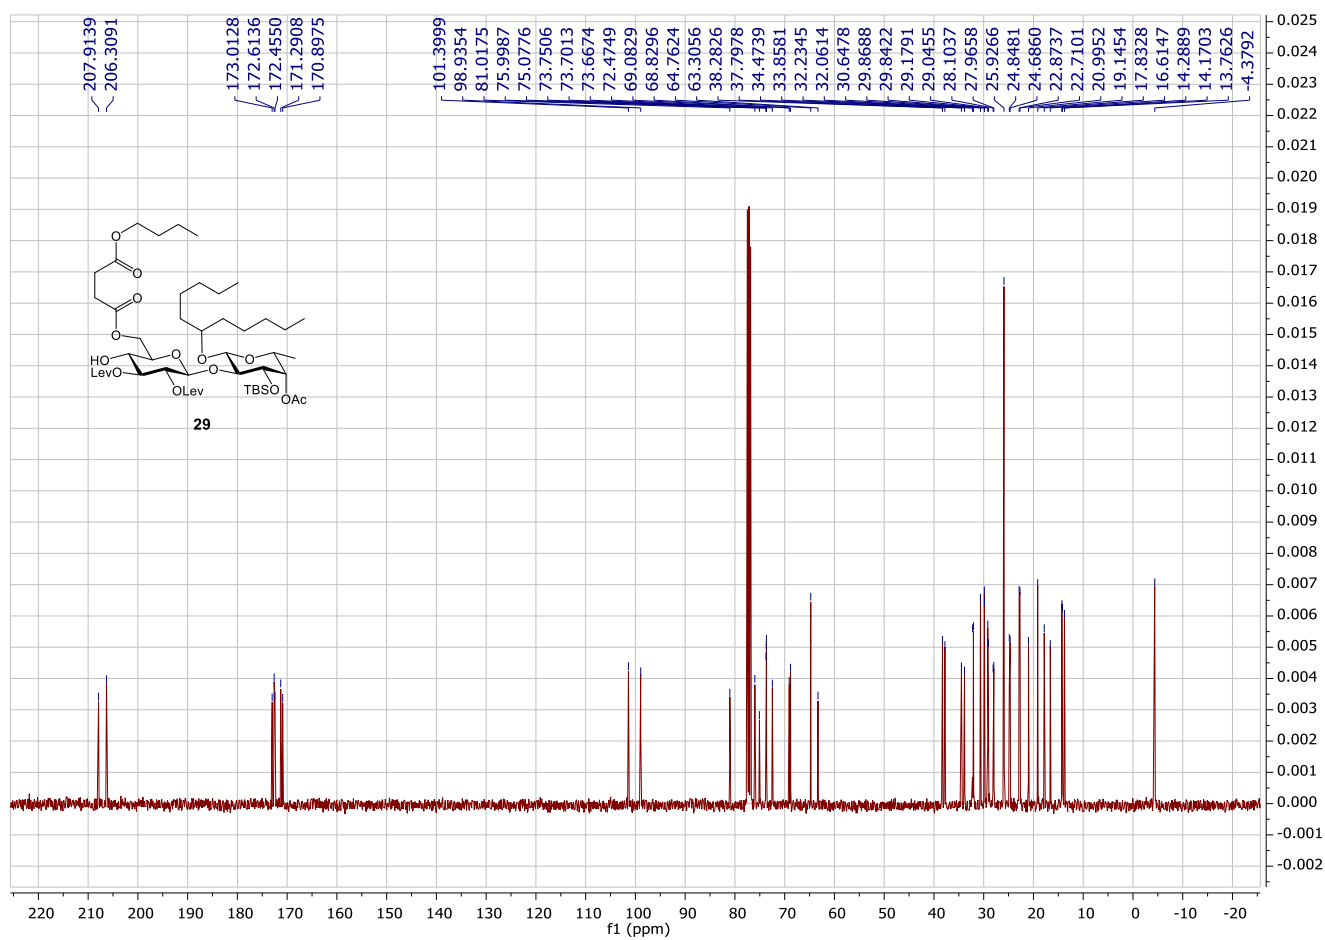

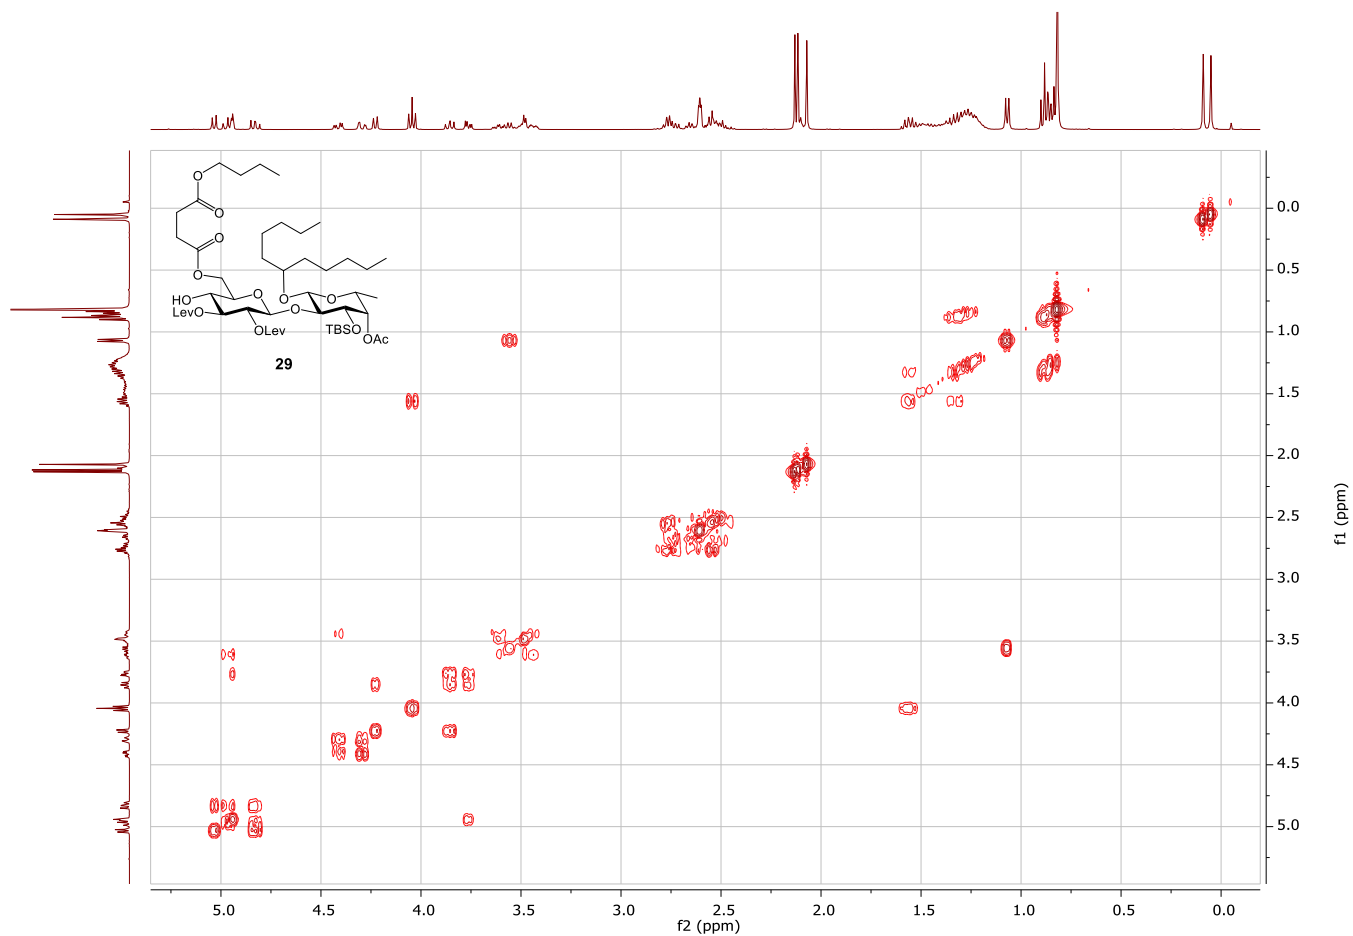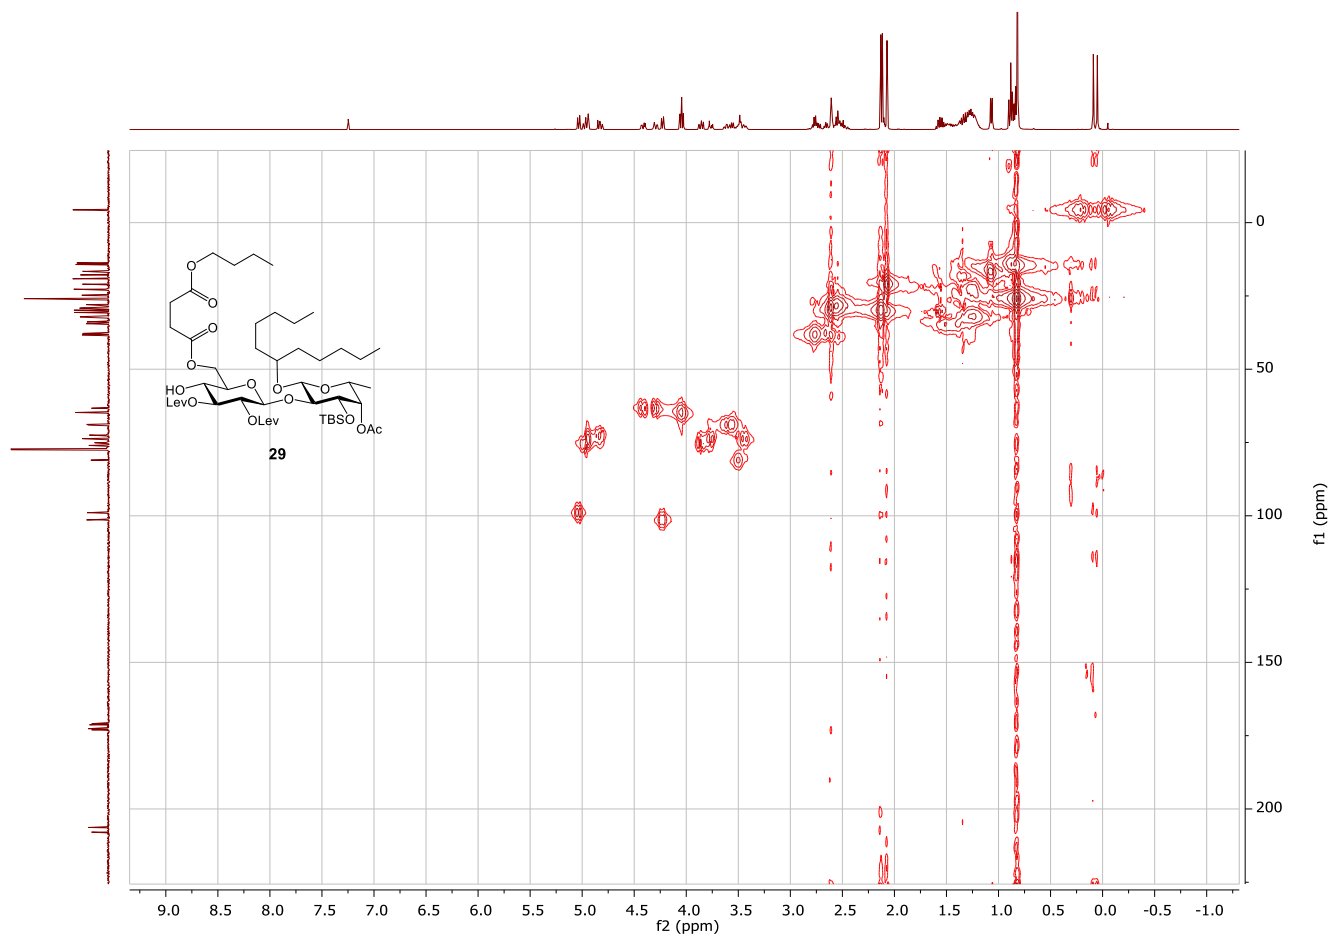



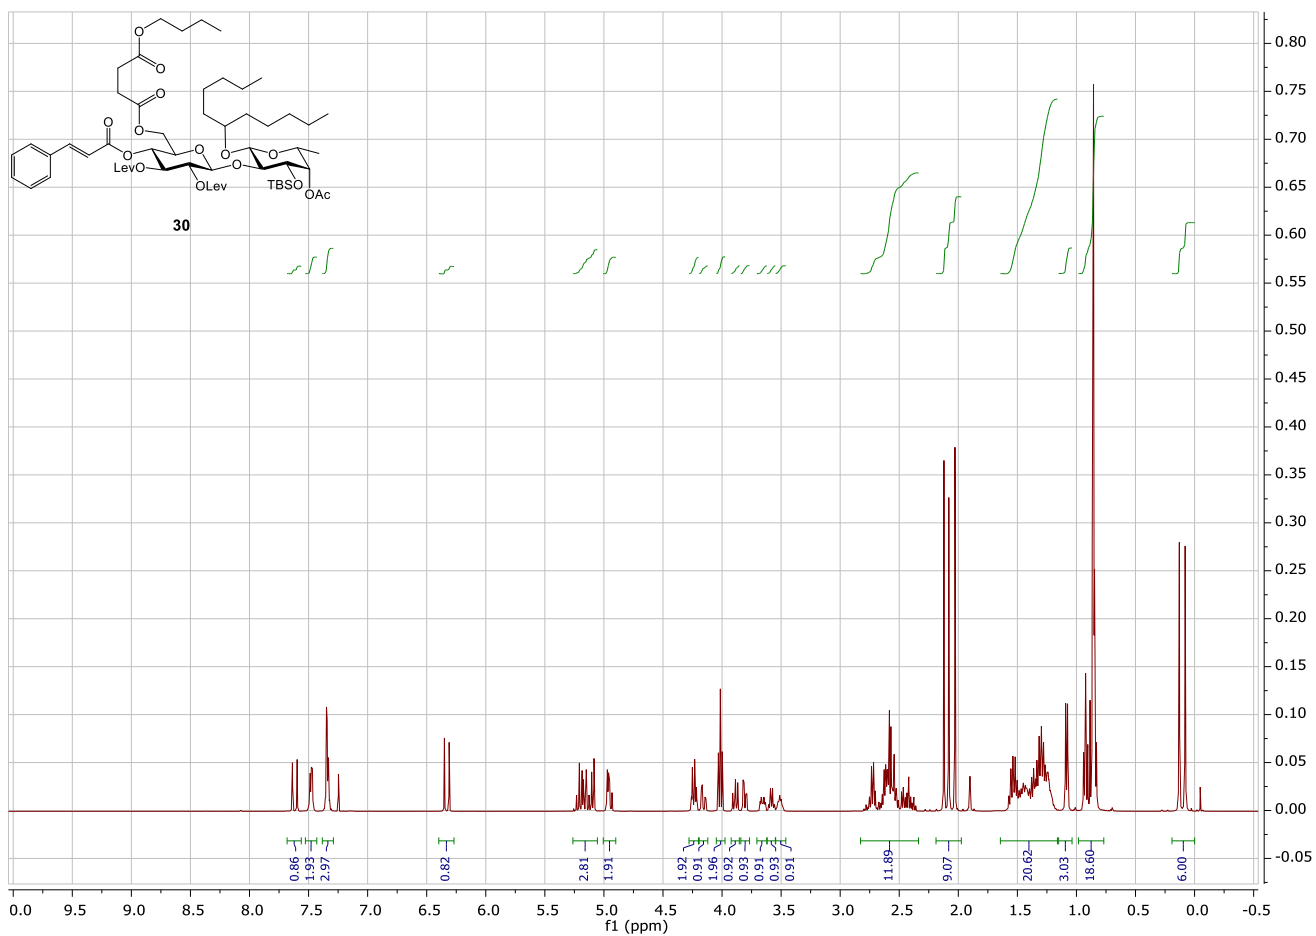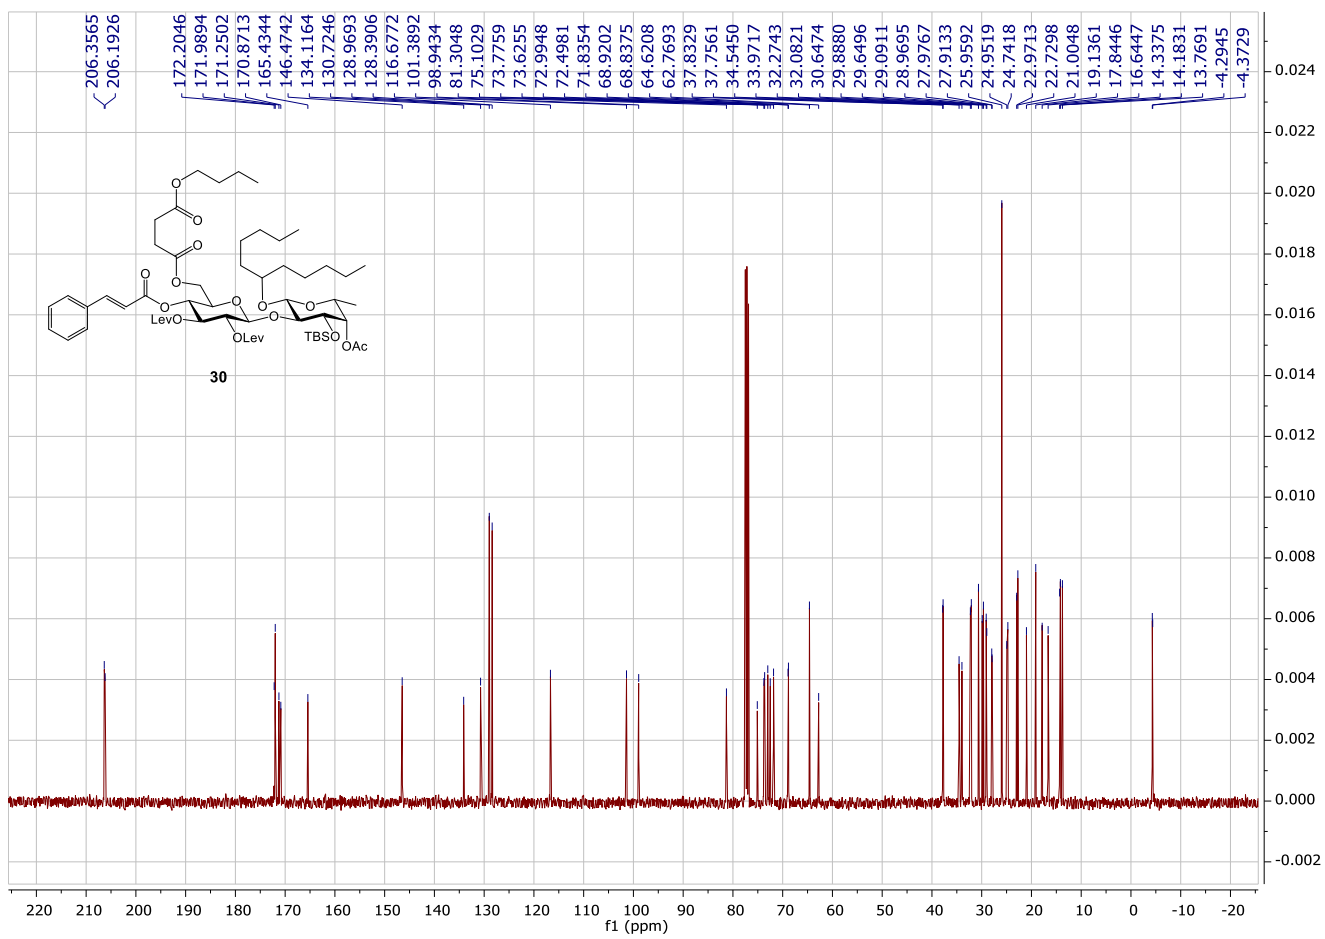

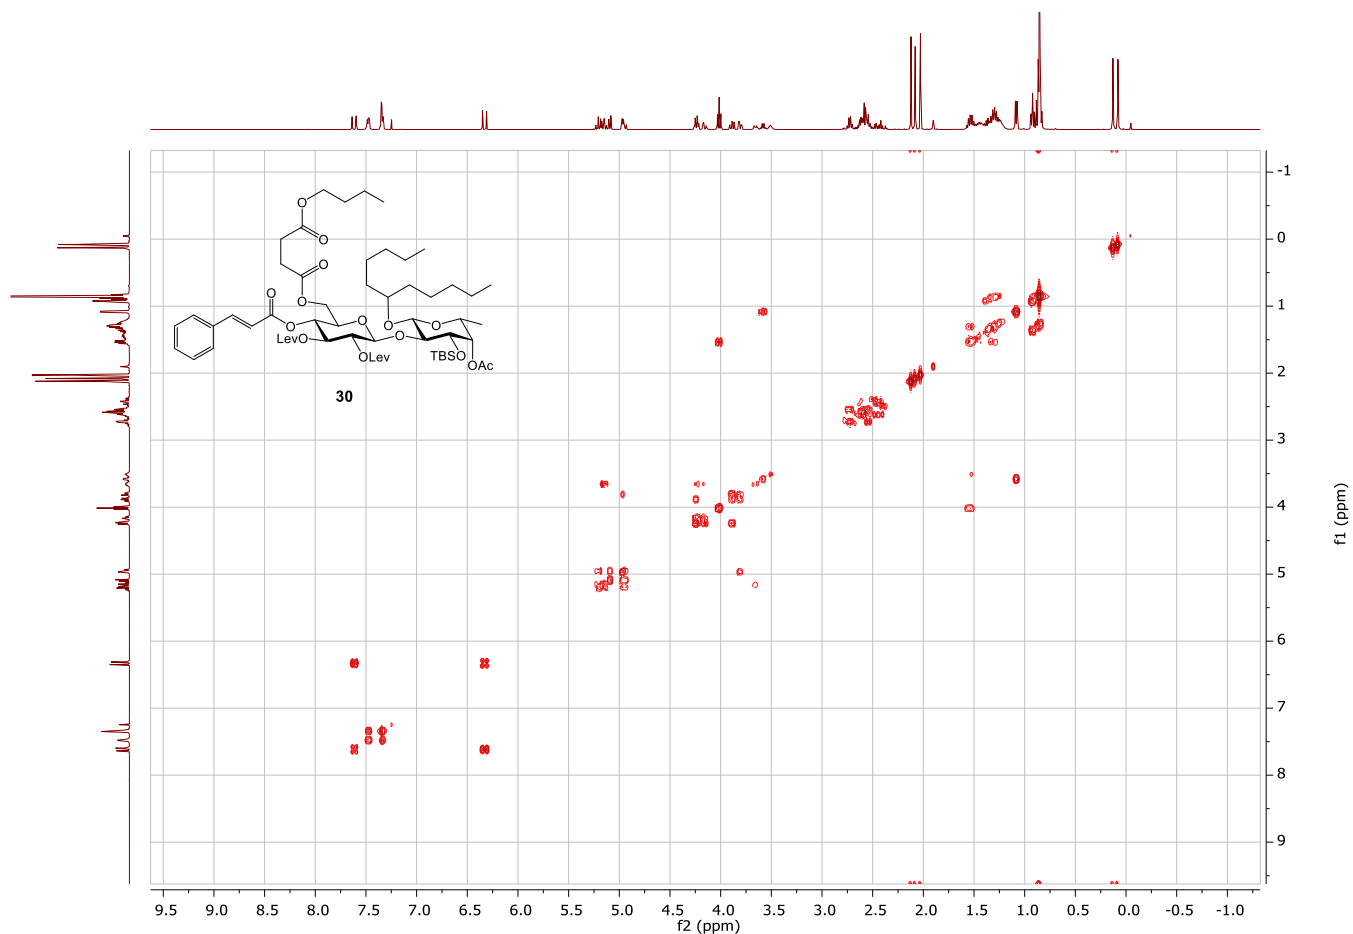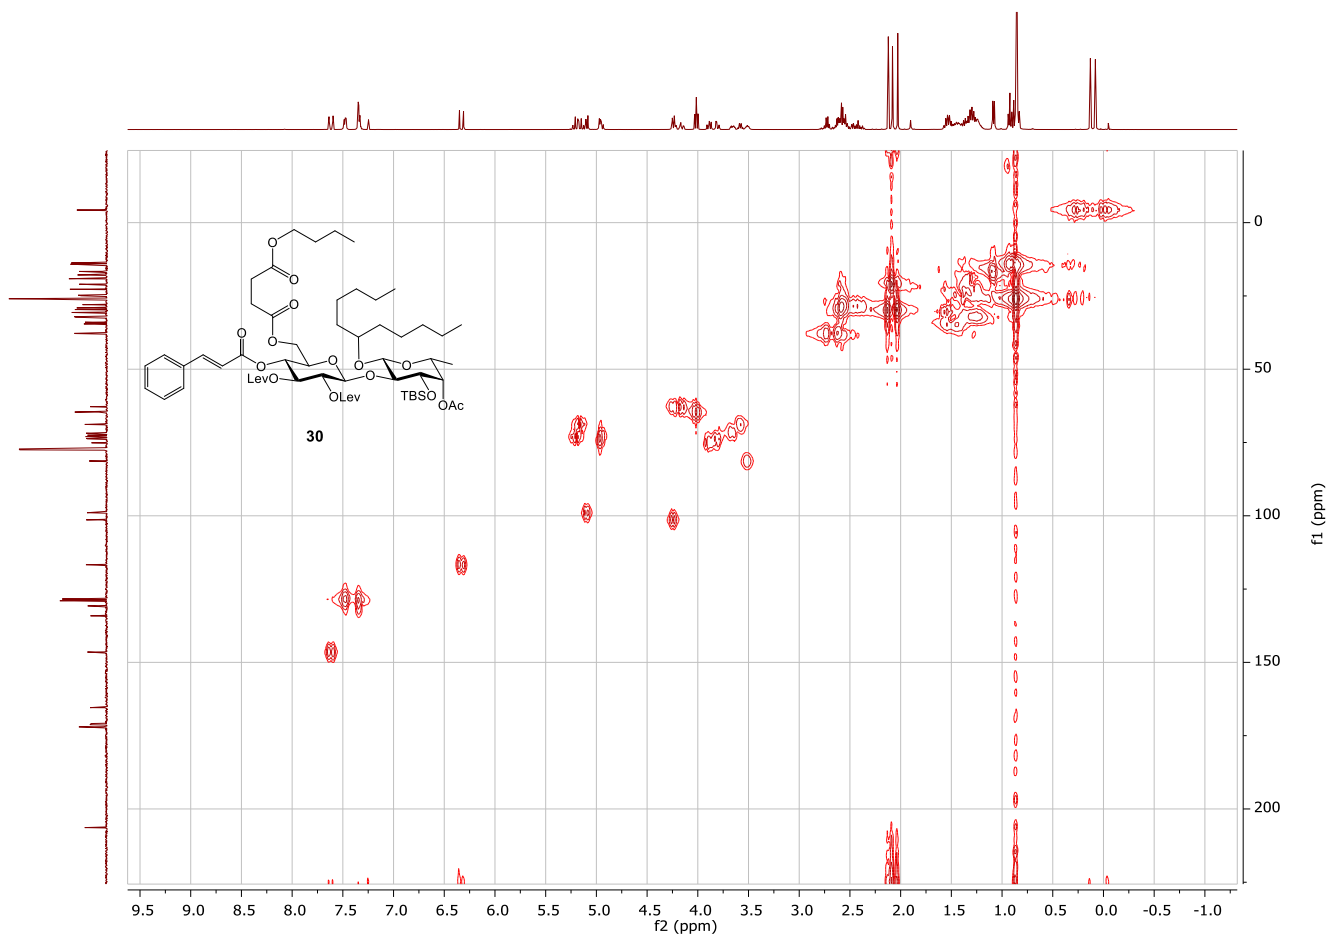

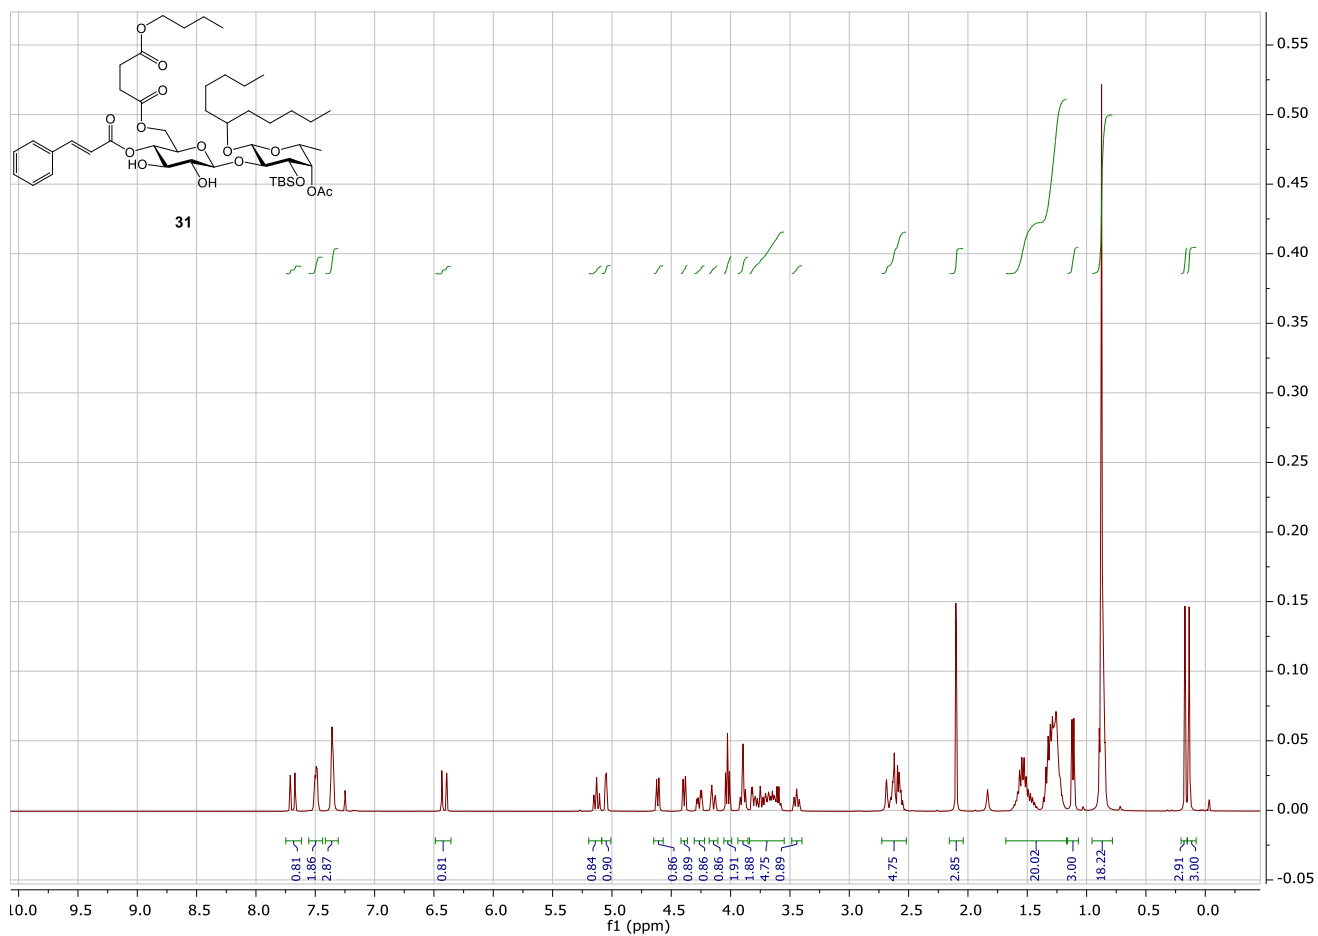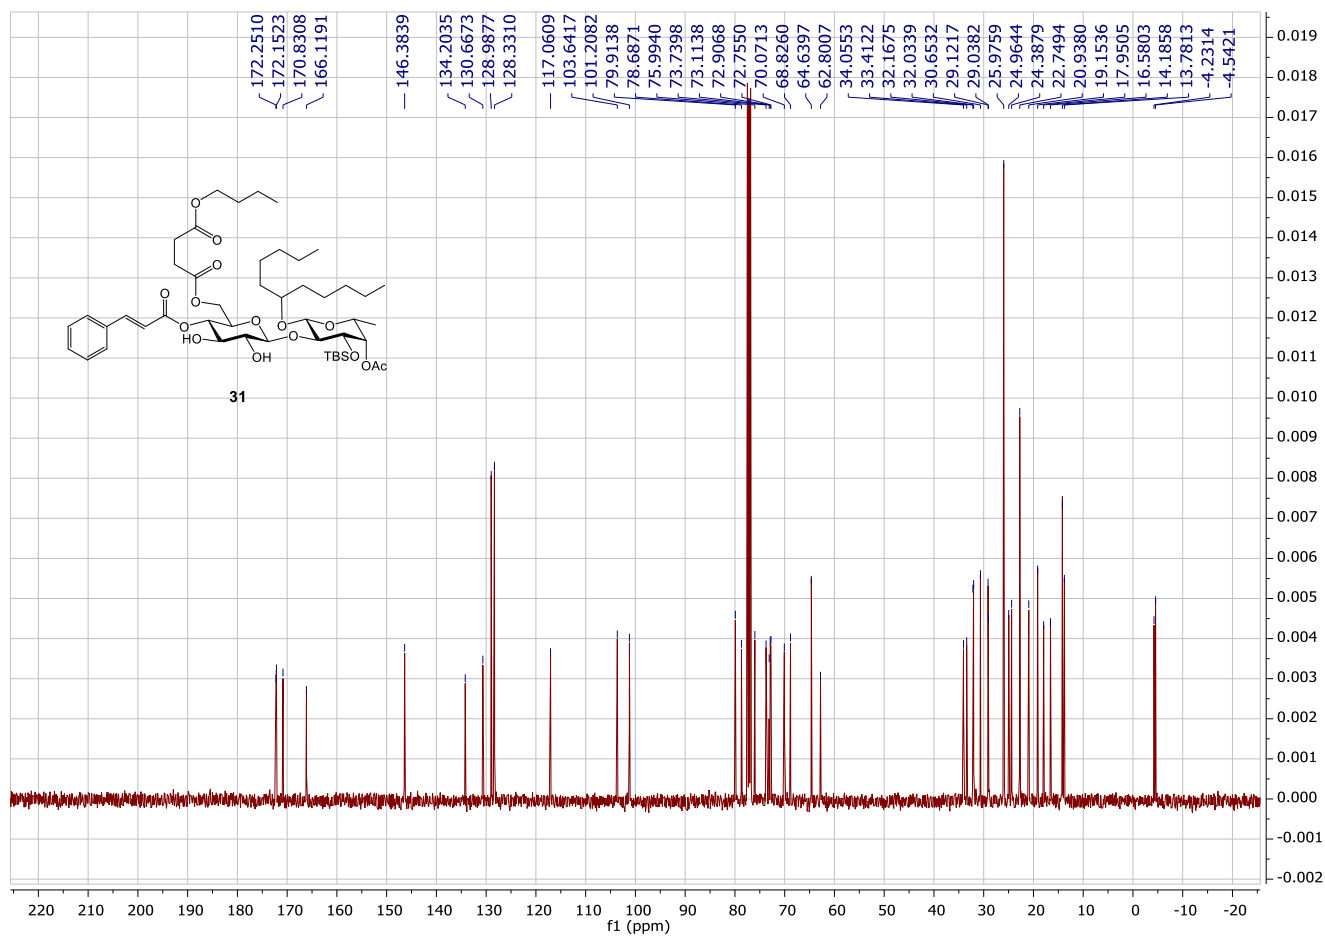

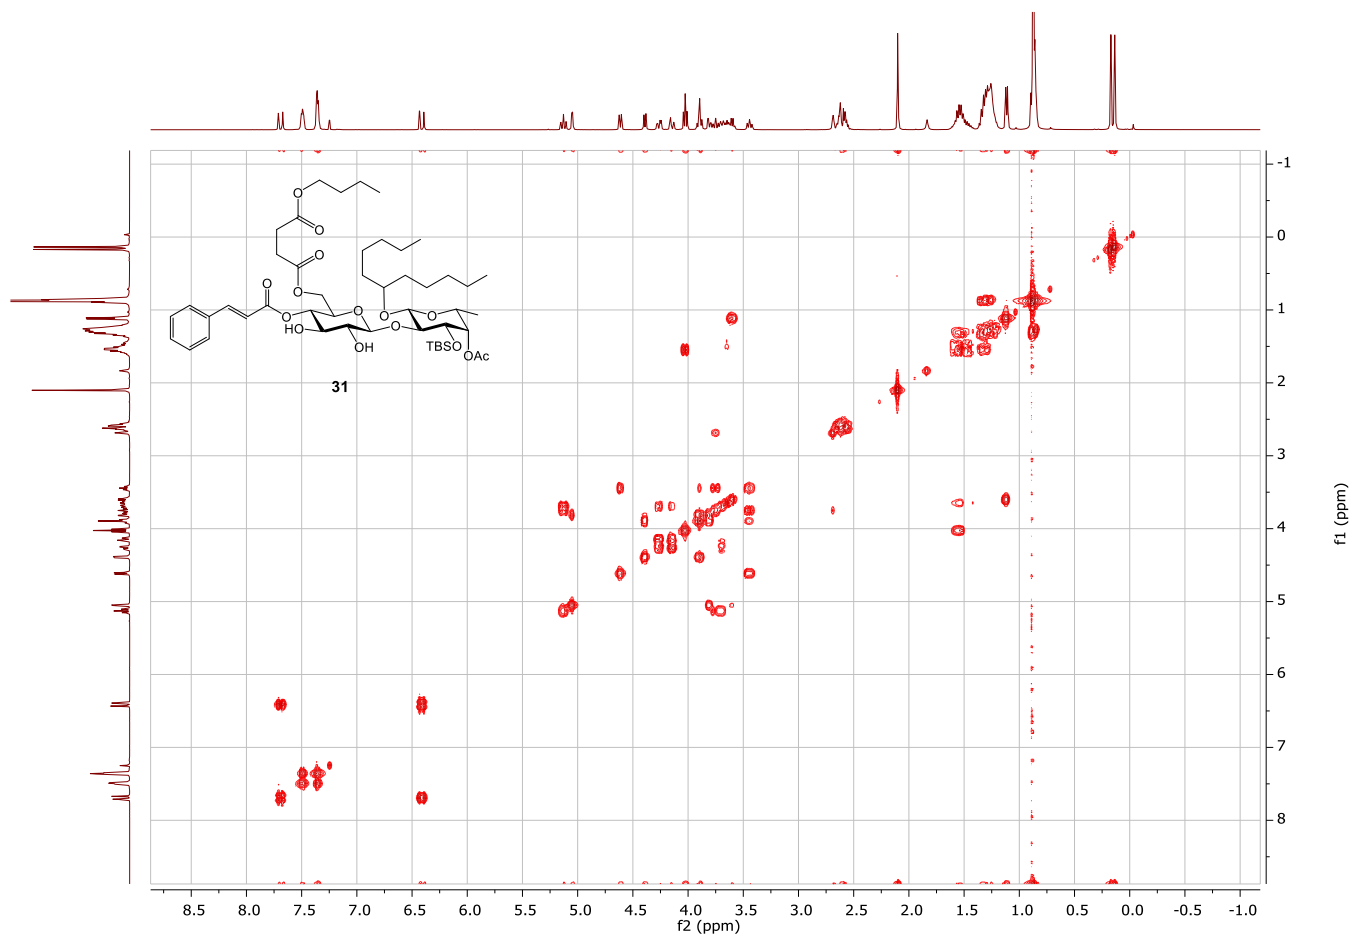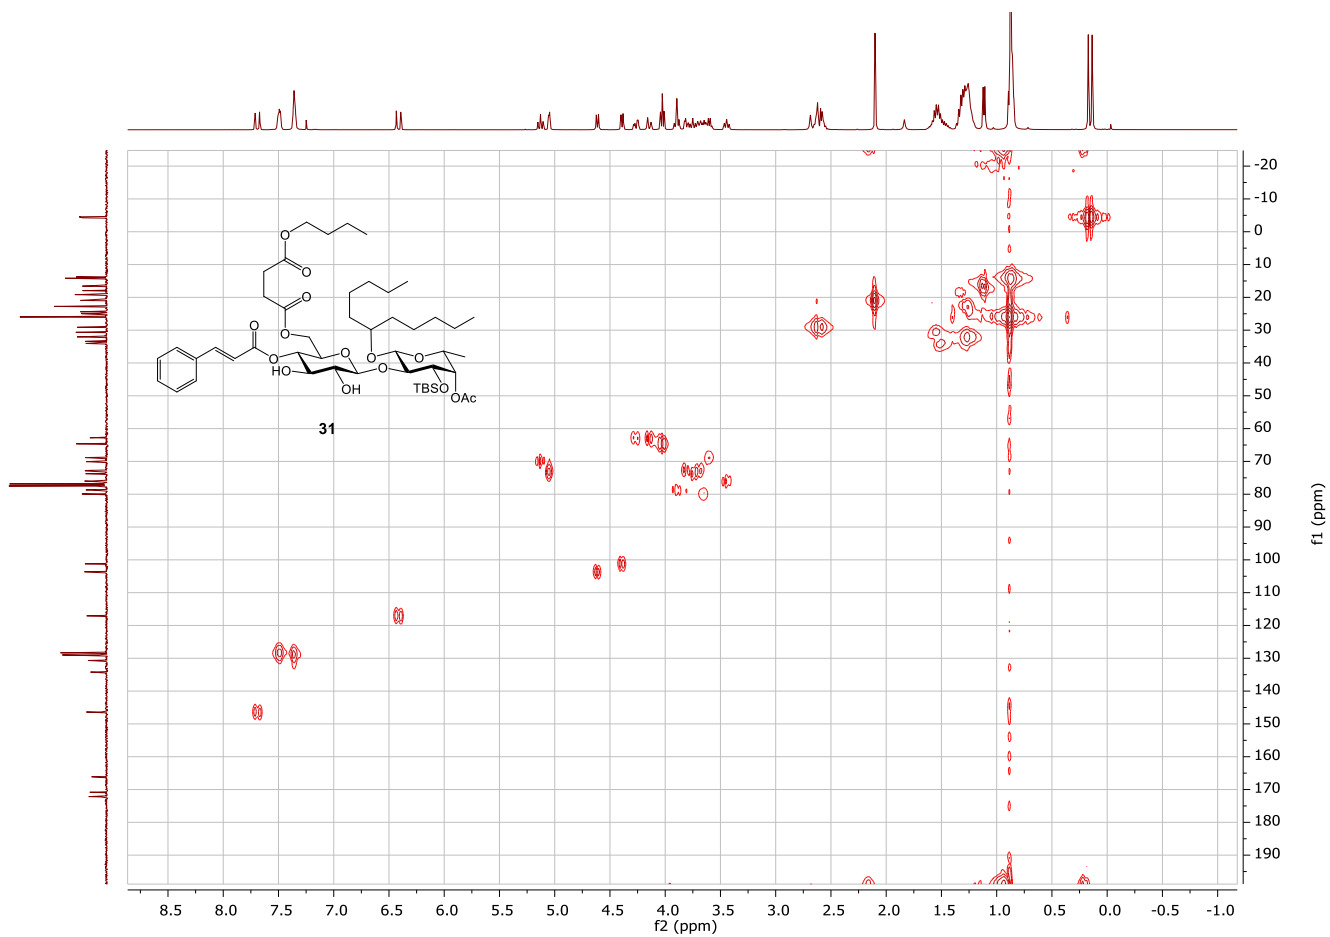

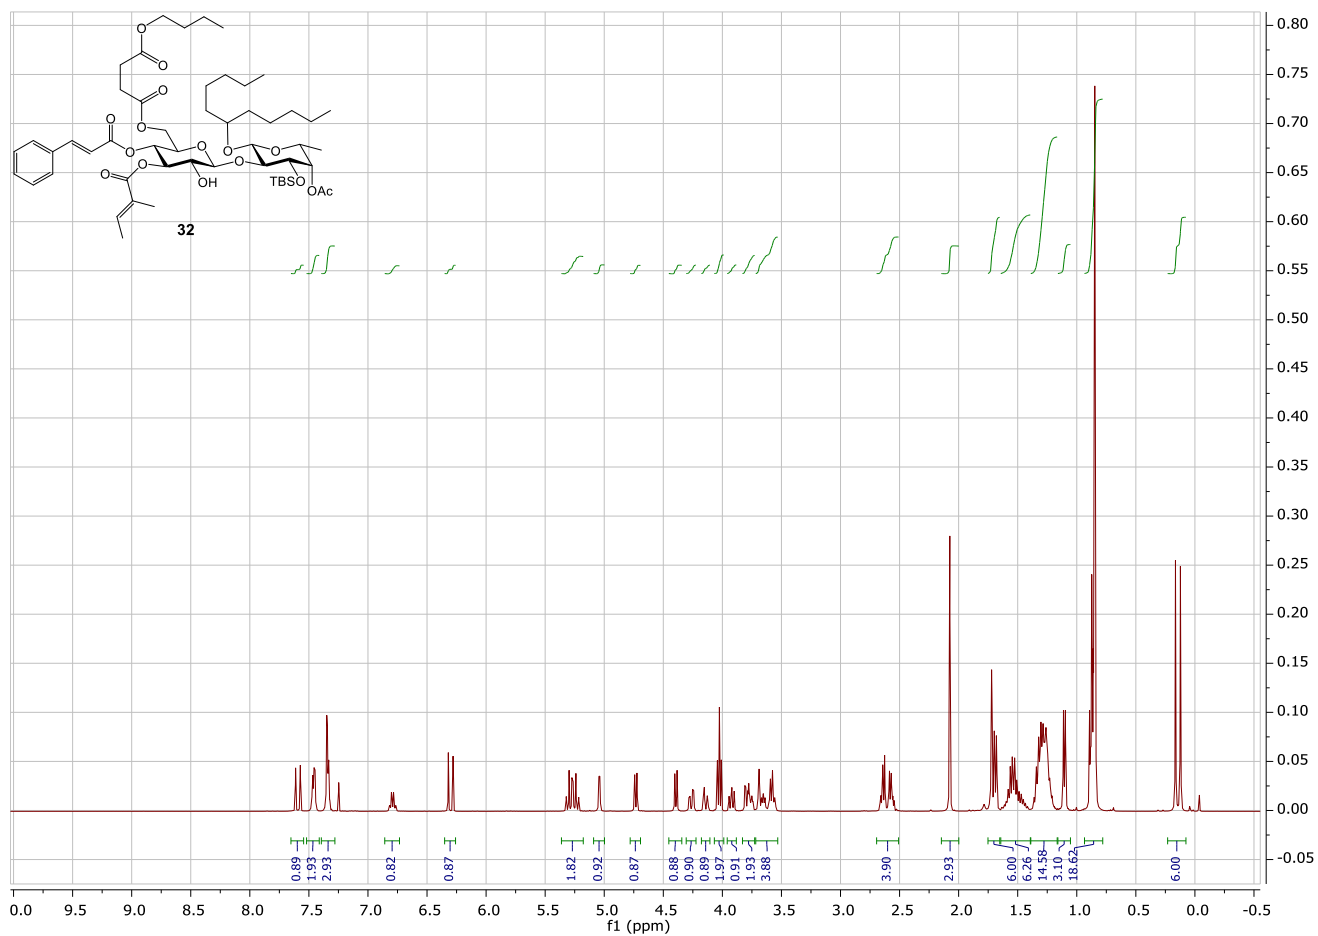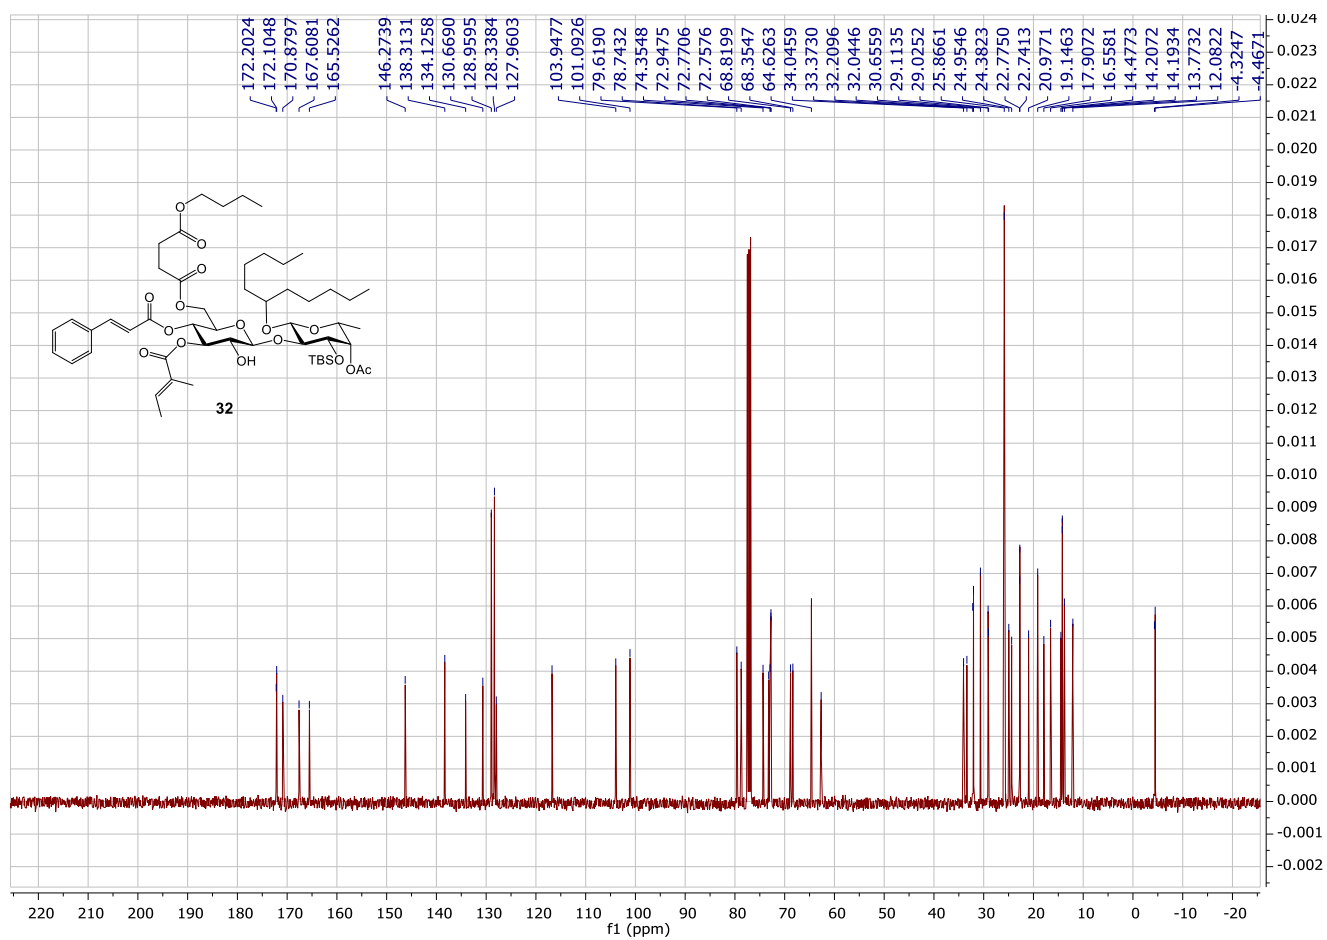

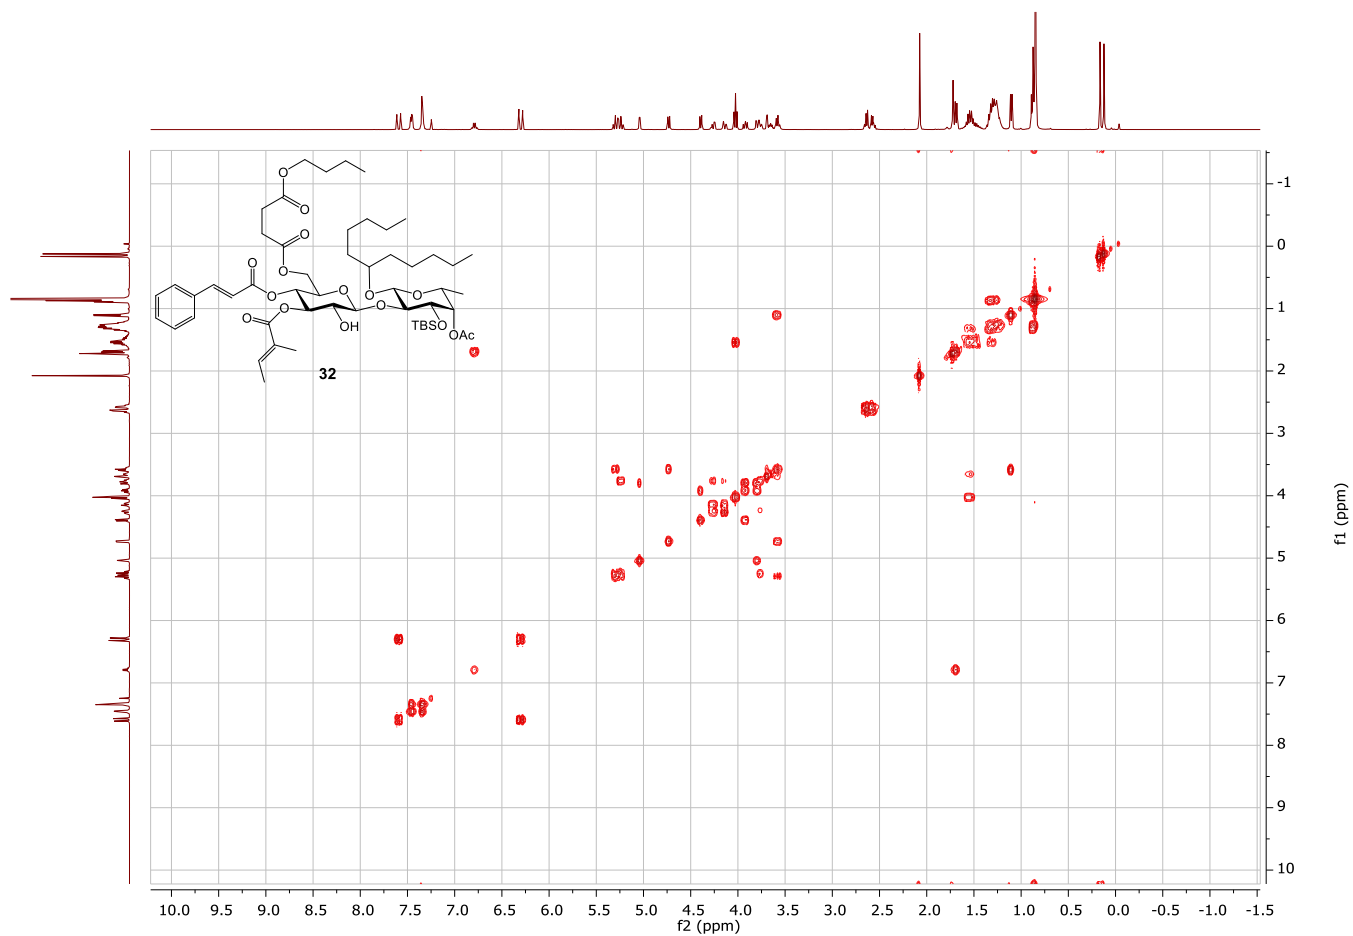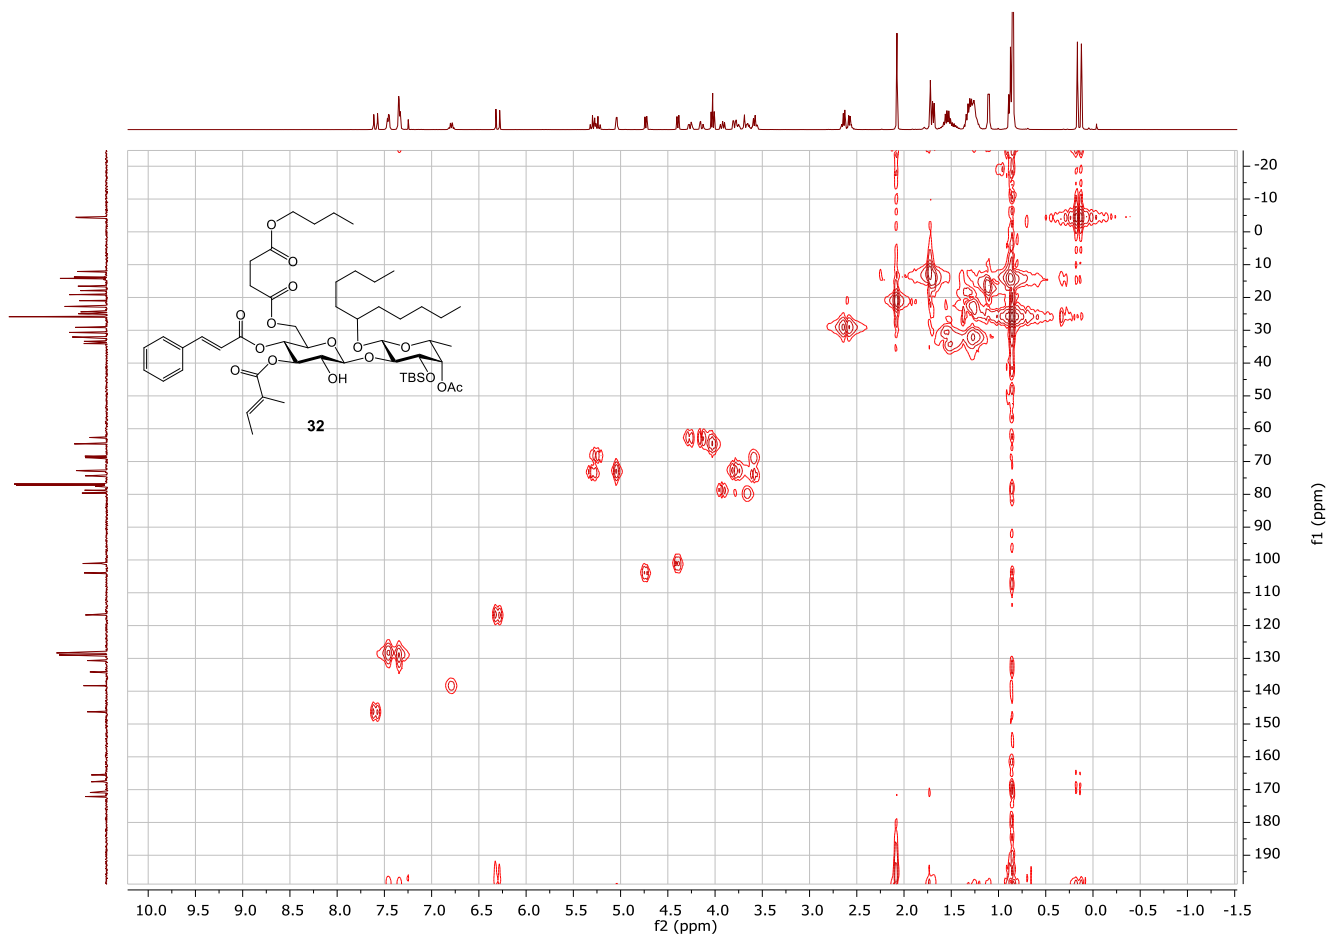

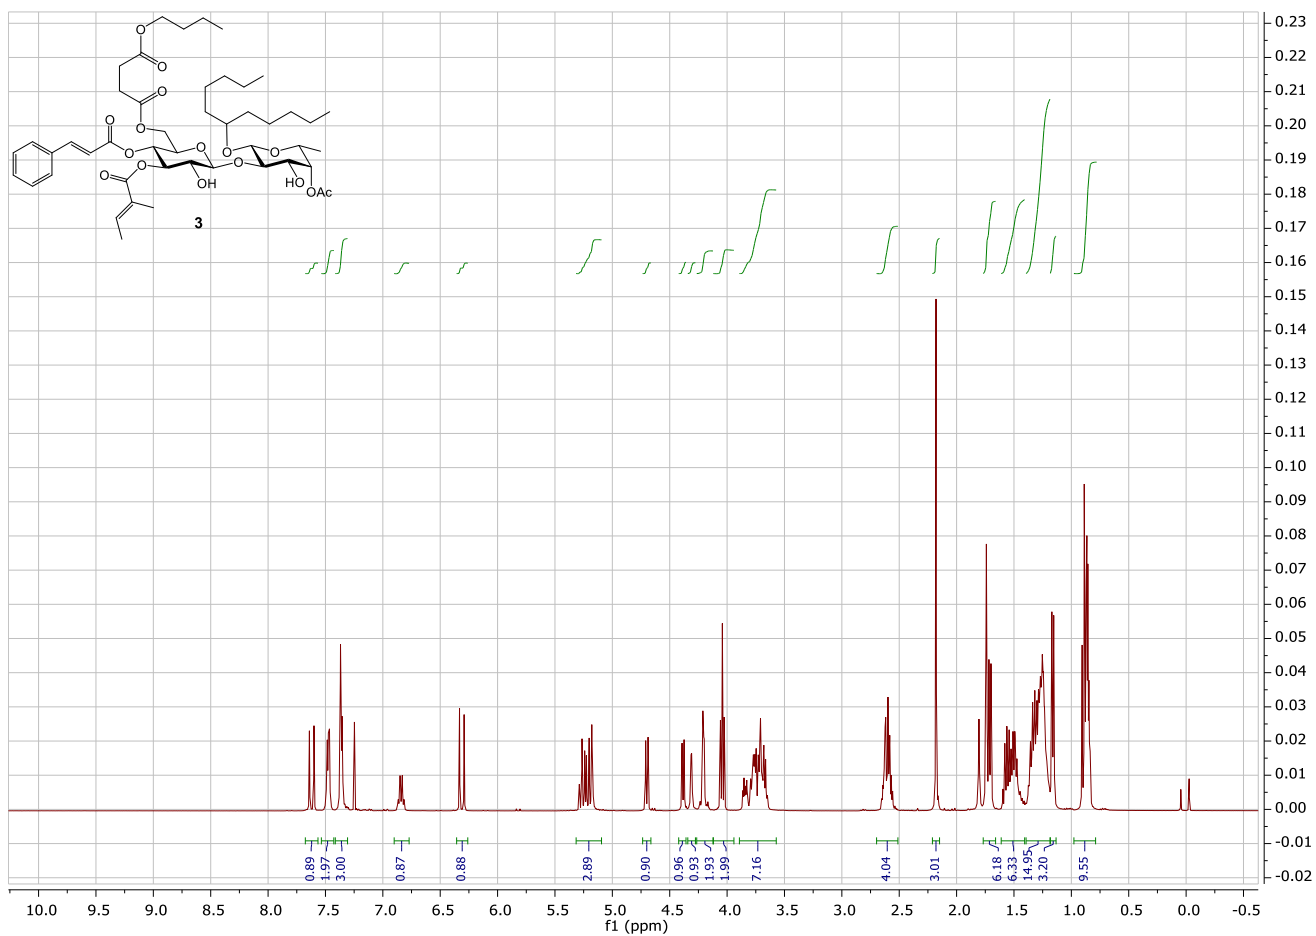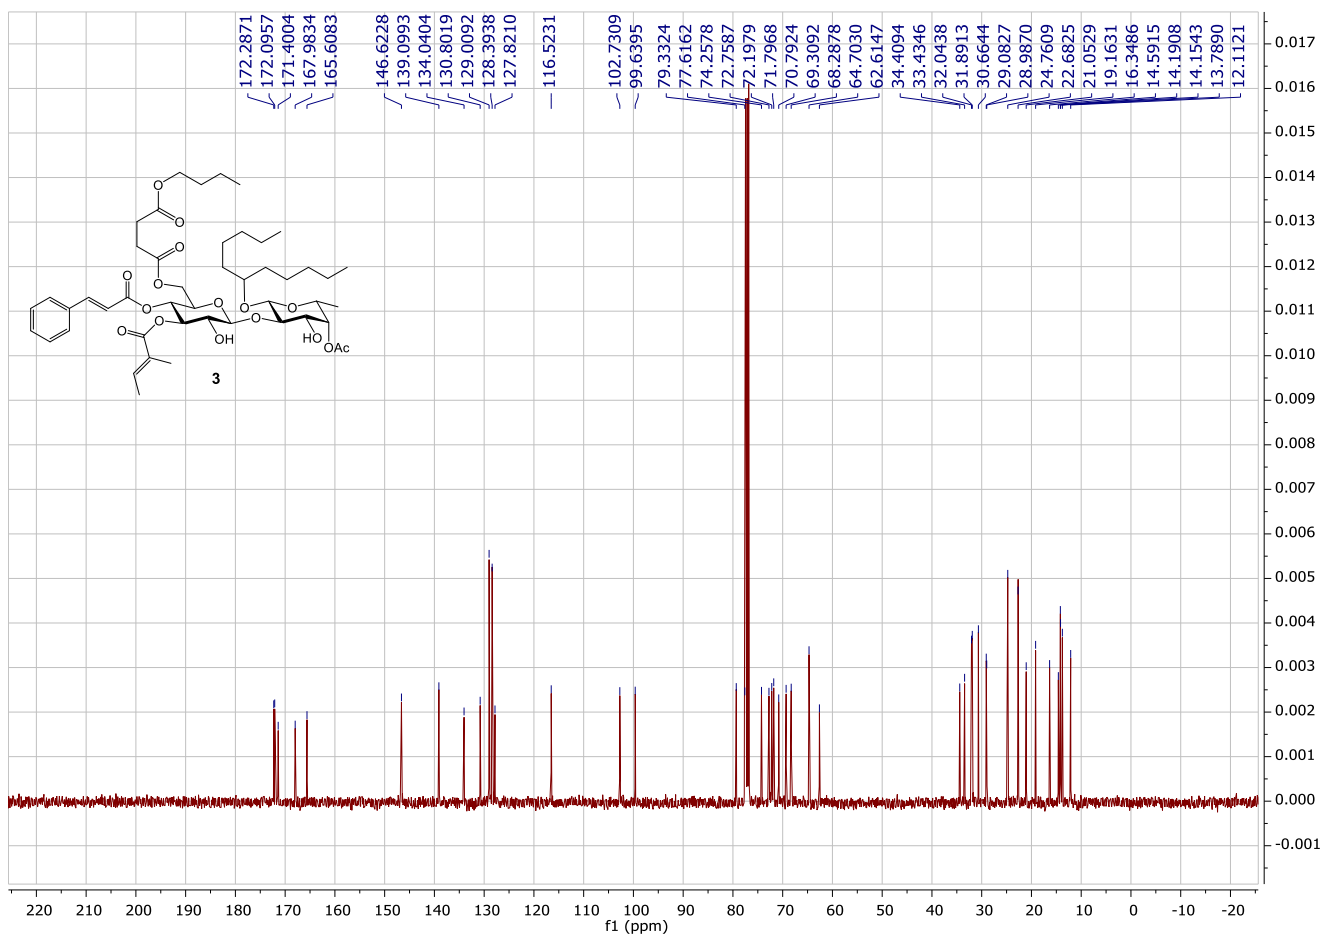

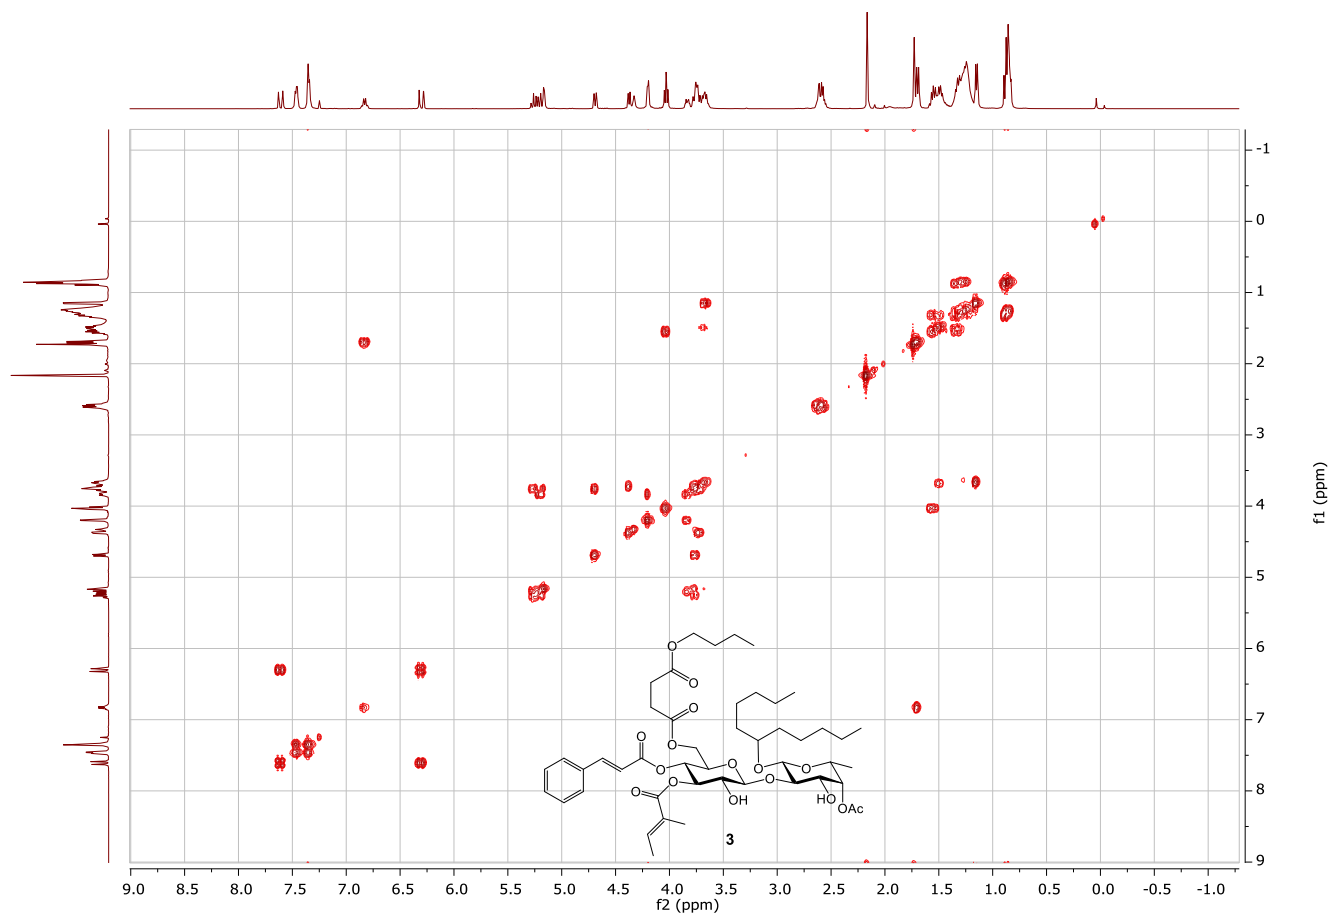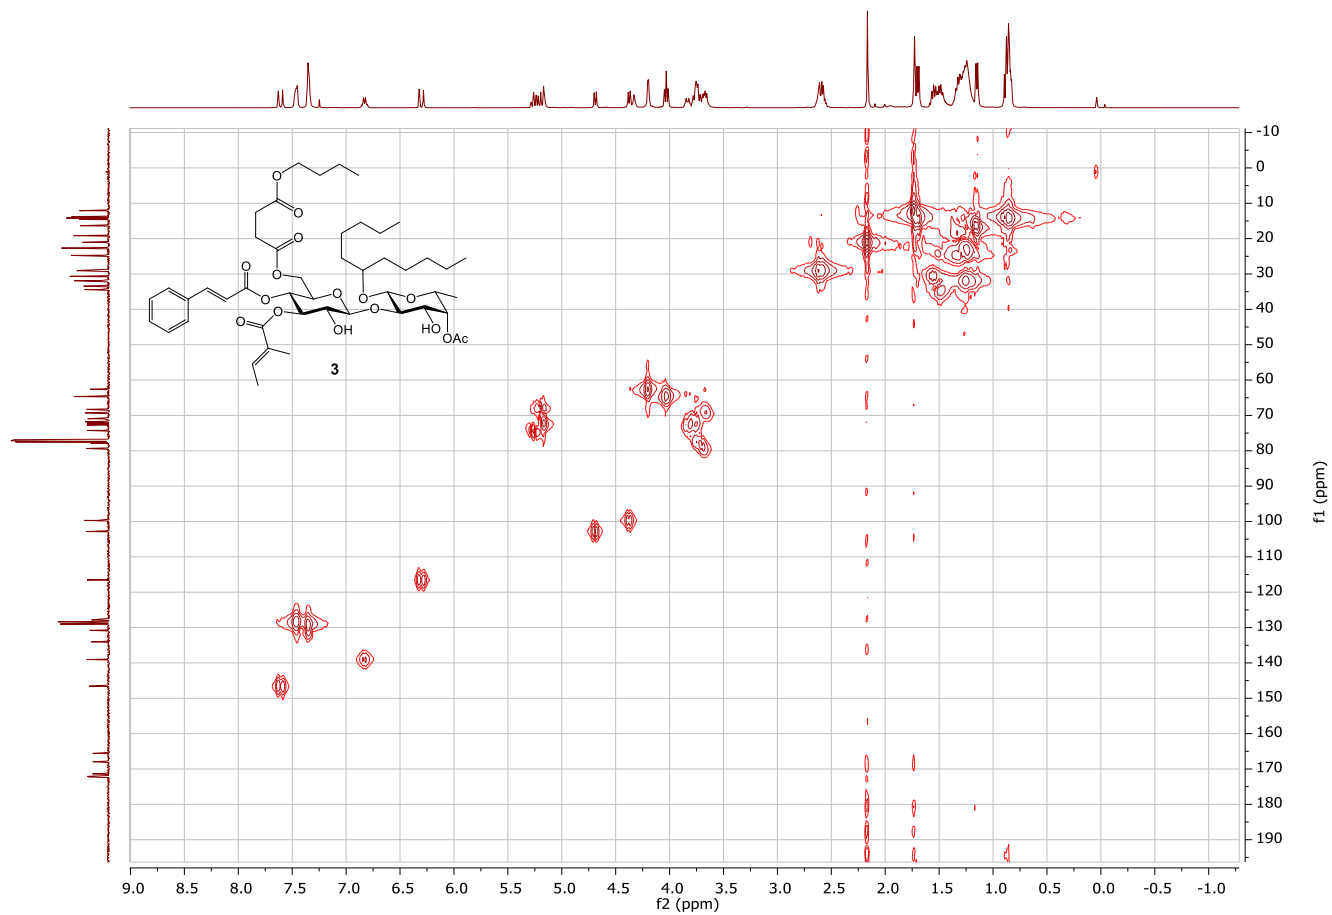



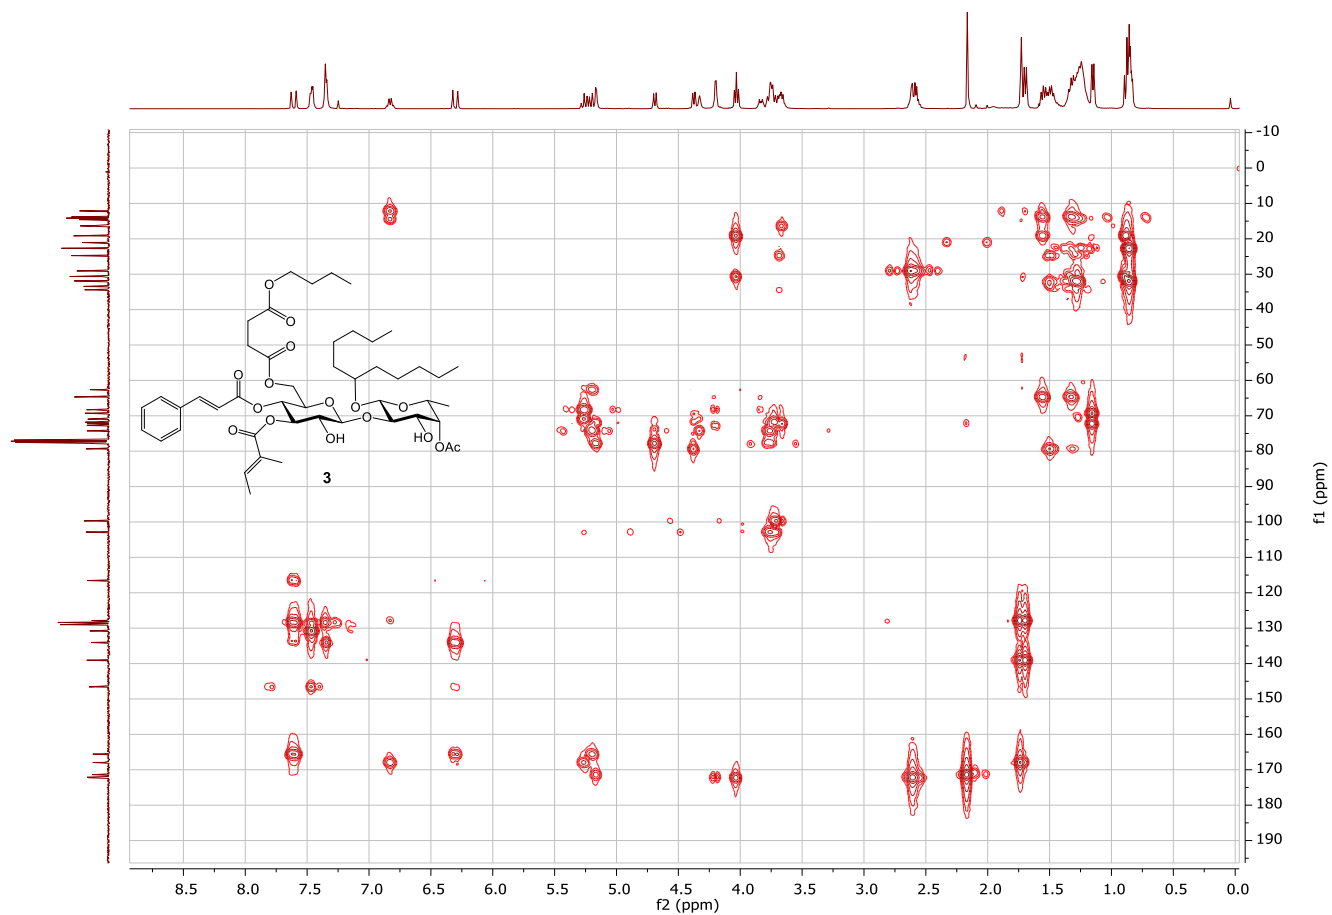

Supplement: s1 [file s1]
